# Supplementary material for: Mechanism and stereoselectivity of the Rh(ii)-catalyzed cyclopropanation of diazooxindole: a density functional theory study
Source: Royal Society of Chemistry journal article supplement (doi:10.1039/c5ra07981k), 2015-01-01
Supplement: c5ra07981k1.pdf [file c5ra07981k1.pdf]

## Supporting Information

### Mechanism and Stereoselectivity of the Rh(II)-catalyzed cyclopropanation of diazooxindole: A Density Functional Theory Study

Yun-Sheng Xue,<sup>a,b</sup> Yu-Ping Cai,<sup>a</sup> Zhao-Xu Chen <sup>\*,a</sup>

<sup>a</sup> Institute of Theoretical and Computational Chemistry, Key Laboratory of  
Mesoscopic Chemistry of MOE, School of Chemistry and Chemical Engineering,  
Nanjing University, Nanjing, 210093, P. R. China

<sup>b</sup> School of Pharmacy, Xuzhou Medical College, No. 209, Tongshan Road, Xuzhou,  
221004, P. R. China

E-mail: zxchen@nju.edu.cn (Z.-X. Chen)

### Contents

- 1. Table S1.** Energies and relative energies of the stationary points in the  
Rh<sub>2</sub>(OAc)<sub>4</sub>-catalyzed reaction obtained at different levels of theory.....S4
- 2. Table S2.** Calculated relative free energies with and without BSSE correction of  
the stationary points at the B3LYP-D3 level.....S5
- 3. Table S3.** Some donor-acceptor interactions in **TS11a** and **TS11b** and their  
second order perturbation stabilization energies, *E*(2).....S6

|                                                                                                                                                                                                                                             |     |
|---------------------------------------------------------------------------------------------------------------------------------------------------------------------------------------------------------------------------------------------|-----|
| 4. <b>Table S4.</b> Natural charge on different parts of species in the Rh <sub>2</sub> (OAc) <sub>4</sub> -catalyzed reaction.....                                                                                                         | S7  |
| 5. <b>Table S5.</b> Natural charge on different parts of species in Rh <sub>2</sub> (S-PTTL) <sub>4</sub> -catalyzed reaction.....                                                                                                          | S7  |
| 6. <b>Figure S1.</b> Energy profile for the uncatalyzed cyclopropanation of diazooxindole and styrene for the <i>Re</i> -face pathway.....                                                                                                  | S7  |
| 7. <b>Figure S2.</b> Comparison between the DFT and x-ray (in parentheses) structure of Rh <sub>2</sub> (OAc) <sub>4</sub> .....                                                                                                            | S8  |
| 8. <b>Figure S3.</b> Potential complexes formed between diazooxindole <b>1</b> and Rh <sub>2</sub> (OAc) <sub>4</sub> <b>3</b> ( <b>4</b> , <b>5</b> and <b>6</b> ) or between styrene <b>2</b> and <b>3</b> ( <b>7</b> and <b>8</b> )..... | S8  |
| 9. <b>Figure S4.</b> Calculated structures (top view) of the stationary points involved in the Rh <sub>2</sub> (OAc) <sub>4</sub> catalyzed cyclopropanation.....                                                                           | S9  |
| 10. <b>Figure S5.</b> Diagram of LUMO of diazooxindole <b>1</b> (left) and carbenoid complex <b>10</b> (right).....                                                                                                                         | S10 |
| 11. Analysis of other four attack models in Rh <sub>2</sub> (OAc) <sub>4</sub> -catalyzed reaction.....                                                                                                                                     | S10 |
| 12. <b>Figure S6.</b> Optimized structures (top view) of the stationary points involved in the Rh <sub>2</sub> (S-PTTL) <sub>4</sub> catalyzed cyclopropanation.....                                                                        | S12 |
| 13. <b>Table S6.</b> DFT-Computed Energies at the SMD-(D3)B3LYP/6-311+G** (Lanl2DZ) // B3LYP/6-31G** (Lanl2DZ) level of theory.....                                                                                                         | S13 |
| 14. Computed Molecular Cartesian Coordinates and Energies.....                                                                                                                                                                              | S14 |
| 14.1 Uncatalyzed reaction (Diazooxindole+Styrene).....                                                                                                                                                                                      | S14 |
| 14.2 Rh <sub>2</sub> (OAc) <sub>4</sub> -Model (Diazooxindole+Styrene+ Rh <sub>2</sub> (OAc) <sub>4</sub> ).....                                                                                                                            | S26 |

|            |                                                                                                   |     |
|------------|---------------------------------------------------------------------------------------------------|-----|
| 14.3       | $\text{Rh}_2(\text{S-PTTL})_4$ -Model (Diazoindole+Styrene+ $\text{Rh}_2(\text{S-PTTL})_4$ )..... | S47 |
| <b>15.</b> | Possible Complexes of Catalyst and Diazoindole.....                                               | S84 |

1. **Table S1.** Energies and relative energies of the stationary points in the Rh<sub>2</sub>(OAc)<sub>4</sub>-catalyzed reaction obtained at different levels of theory. The data reported here is BSSE uncorrected.

**B3LYP:**

| Comp. | SPE <sup>a</sup> | TCH <sup>a</sup> | TCG <sup>a</sup> | H <sup>a</sup> | G <sup>a</sup> | ΔH <sup>b</sup> | ΔG <sup>b</sup> | ΔG <sup>‡b</sup> |
|-------|------------------|------------------|------------------|----------------|----------------|-----------------|-----------------|------------------|
| 1     | -547.47317       | 0.130823         | 0.086594         | -547.342342    | -547.386571    |                 |                 |                  |
| 2     | -309.74303       | 0.141445         | 0.102245         | -309.6015836   | -309.6407836   |                 |                 |                  |
| 3     | -1133.4327       | 0.233105         | 0.158468         | -1133.199632   | -1133.274269   |                 |                 |                  |
| N2    | -109.55442       | 0.008904         | -0.012851        | -109.5455193   | -109.5672743   |                 |                 |                  |
| 4     | -1680.9018       | 0.366466         | 0.265346         | -1680.53533    | -1680.63645    | 4.2             | 15.3            | 0.0              |
| TS9   | -1680.8738       | 0.363761         | 0.262882         | -1680.510045   | -1680.610924   | 20.0            | 31.3            | 16.0             |
| 10    | -1571.3516       | 0.353361         | 0.257548         | -1570.998264   | -1571.094077   | -1.1            | -0.3            | 0.0              |
| TS11a | -1881.0872       | 0.497372         | 0.384651         | -1880.589785   | -1880.702506   | 5.2             | 20.0            | 20.3             |
| TS11b | -1881.0857       | 0.497321         | 0.38399          | -1880.588412   | -1880.701743   | 6.0             | 20.5            | 20.8             |
| TS11c | -1881.0828       | 0.49738          | 0.384069         | -1880.585396   | -1880.698707   | 7.9             | 22.4            | 22.7             |
| TS11d | -1881.0764       | 0.496503         | 0.38864          | -1880.579894   | -1880.687757   | 11.4            | 29.2            | 29.5             |
| 12a   | -747.72934       | 0.264402         | 0.208098         | -747.4649336   | -747.5212376   | -41.7           | -38.4           |                  |
| 12b   | -747.72737       | 0.264375         | 0.208383         | -747.4629912   | -747.5189832   | -40.5           | -37.0           |                  |

<sup>a</sup> in hartree; <sup>b</sup> in kcal/mol; ΔG: relative Gibbs free energy with respect to the free reactants; ΔG<sup>‡</sup>: free energy barrier.

**D3-B3LYP:**

| Comp. | SPE          | TCH      | TCG       | H            | G            | ΔH    | ΔG    | ΔG <sup>‡</sup> |
|-------|--------------|----------|-----------|--------------|--------------|-------|-------|-----------------|
| 1     | -547.4854134 | 0.130823 | 0.086594  | -547.3545904 | -547.3988194 |       |       |                 |
| 2     | -309.7520696 | 0.141445 | 0.102245  | -309.6106246 | -309.6498246 |       |       |                 |
| 3     | -1133.466258 | 0.233105 | 0.158468  | -1133.233153 | -1133.30779  |       |       |                 |
| N2    | -109.5544237 | 0.008904 | -0.012851 | -109.5455197 | -109.5672747 |       |       |                 |
| 4     | -1680.966521 | 0.366466 | 0.265346  | -1680.600055 | -1680.701175 | -7.7  | 3.4   | 0.0             |
| TS9   | -1680.939426 | 0.363761 | 0.262882  | -1680.575665 | -1680.676544 | 7.6   | 18.9  | 15.5            |
| 10    | -1571.409114 | 0.353361 | 0.257548  | -1571.055753 | -1571.151566 | -8.5  | -7.7  | 0.0             |
| TS11a | -1881.174697 | 0.497372 | 0.384651  | -1880.677325 | -1880.790046 | -15.4 | -0.6  | 7.1             |
| TS11b | -1881.171175 | 0.497321 | 0.38399   | -1880.673854 | -1880.787185 | -13.2 | 1.2   | 8.9             |
| TS11c | -1881.168369 | 0.49738  | 0.384069  | -1880.670989 | -1880.7843   | -11.4 | 3.0   | 10.7            |
| TS11d | -1881.165337 | 0.496503 | 0.38864   | -1880.668834 | -1880.776697 | -10.0 | 7.8   | 15.5            |
| 12a   | -747.7583842 | 0.264402 | 0.208098  | -747.493982  | -747.5502862 | -46.6 | -43.2 |                 |
| 12b   | -747.7555484 | 0.264375 | 0.208383  | -747.491173  | -747.5471654 | -44.9 | -41.3 |                 |

**M06:**

| Comp. | SPE         | TCH      | TCG      | H            | G            | ΔH | ΔG | ΔG <sup>‡</sup> |
|-------|-------------|----------|----------|--------------|--------------|----|----|-----------------|
| 1     | -547.100898 | 0.130823 | 0.086594 | -546.9700749 | -547.0143039 |    |    |                 |

|              |             |          |           |              |              |       |       |      |
|--------------|-------------|----------|-----------|--------------|--------------|-------|-------|------|
| <b>2</b>     | -309.480371 | 0.141445 | 0.102245  | -309.3389257 | -309.3781257 |       |       |      |
| <b>3</b>     | -1132.84886 | 0.233105 | 0.158468  | -1132.615754 | -1132.690391 |       |       |      |
| <b>N2</b>    | -109.485176 | 0.008904 | -0.012851 | -109.476272  | -109.498027  |       |       |      |
| <b>4</b>     | -1679.9657  | 0.366466 | 0.265346  | -1679.599235 | -1679.700355 | -8.4  | 2.7   | 0.0  |
| <b>TS9</b>   | -1679.93721 | 0.363761 | 0.262882  | -1679.573444 | -1679.674323 | 7.8   | 19.1  | 16.4 |
| <b>10</b>    | -1570.47509 | 0.353361 | 0.257548  | -1570.121731 | -1570.217544 | -7.6  | -6.8  | 0.0  |
| <b>TS11a</b> | -1879.96588 | 0.497372 | 0.384651  | -1879.46851  | -1879.581231 | -12.6 | 2.2   | 9.0  |
| <b>TS11b</b> | -1879.96093 | 0.497321 | 0.38399   | -1879.463607 | -1879.576938 | -9.5  | 4.9   | 11.7 |
| <b>TS11c</b> | -1879.95758 | 0.49738  | 0.384069  | -1879.4602   | -1879.573511 | -7.4  | 7.1   | 13.9 |
| <b>TS11d</b> | -1879.95399 | 0.496503 | 0.38864   | -1879.457482 | -1879.565345 | -5.6  | 12.2  | 19.6 |
| <b>12a</b>   | -747.178942 | 0.264402 | 0.208098  | -746.91454   | -746.970844  | -51.3 | -48.0 |      |
| <b>12b</b>   | -747.175568 | 0.264375 | 0.208383  | -746.9111928 | -746.9671848 | -49.2 | -45.7 |      |

**wB97XD:**

| Comp.        | SPE          | TCH      | TCG       | H            | G            | $\Delta H$ | $\Delta G$ | $\Delta G^\ddagger$ |
|--------------|--------------|----------|-----------|--------------|--------------|------------|------------|---------------------|
| <b>1</b>     | -547.2731901 | 0.130823 | 0.086594  | -547.1423671 | -547.1865961 |            |            |                     |
| <b>2</b>     | -309.6242484 | 0.141445 | 0.102245  | -309.4828034 | -309.5220034 |            |            |                     |
| <b>3</b>     | -1133.091044 | 0.233105 | 0.158468  | -1132.857939 | -1132.932576 |            |            |                     |
| <b>N2</b>    | -109.5123733 | 0.008904 | -0.012851 | -109.5034693 | -109.5252243 |            |            |                     |
| <b>4</b>     | -1680.379113 | 0.366466 | 0.265346  | -1680.012647 | -1680.113767 | -7.7       | 3.4        | 0.0                 |
| <b>TS9</b>   | -1680.34965  | 0.363761 | 0.262882  | -1679.985889 | -1680.086768 | 9.0        | 20.3       | 16.9                |
| <b>10</b>    | -1570.859079 | 0.353361 | 0.257548  | -1570.505718 | -1570.601531 | -5.6       | -4.8       | 0.0                 |
| <b>TS11a</b> | -1880.495771 | 0.497372 | 0.384651  | -1879.998399 | -1880.11112  | -11.8      | 3.0        | 7.8                 |
| <b>TS11b</b> | -1880.490597 | 0.497321 | 0.38399   | -1879.993276 | -1880.106607 | -8.6       | 5.9        | 10.7                |
| <b>TS11c</b> | -1880.488905 | 0.49738  | 0.384069  | -1879.991525 | -1880.104836 | -7.5       | 7.0        | 11.8                |
| <b>TS11d</b> | -1880.484263 | 0.496503 | 0.38864   | -1879.98776  | -1880.095623 | -5.1       | 12.8       | 17.6                |
| <b>12a</b>   | -747.476669  | 0.264402 | 0.208098  | -747.212267  | -747.268571  | -56.8      | -53.5      |                     |
| <b>12b</b>   | -747.4728874 | 0.264375 | 0.208383  | -747.2085124 | -747.2645044 | -54.5      | -50.9      |                     |

**2. Table S2.** Calculated relative free energies with and without BSSE correction of the stationary points at the B3LYP-D3 level.

| Comp.        | $\Delta G$ | $\Delta G_{CP}$ | $\Delta G^\ddagger$ | $\Delta G_{CP}^\ddagger$ | $\Delta \Delta G^\ddagger$ | $\Delta \Delta G_{CP}^\ddagger$ |
|--------------|------------|-----------------|---------------------|--------------------------|----------------------------|---------------------------------|
| <b>4</b>     | 3.4        | 6.5             |                     |                          |                            |                                 |
| <b>TS9</b>   | 18.9       | 22.3            | 15.5                | 15.8                     |                            |                                 |
| <b>10</b>    | -7.7       | -5.1            |                     |                          |                            |                                 |
| <b>TS11a</b> | -0.6       | 1.5             | 7.1                 | 6.6                      | 0.0                        | 0.0                             |
| <b>TS11b</b> | 1.2        | 3.1             | 8.9                 | 8.2                      | 1.8                        | 1.6                             |
| <b>TS11c</b> | 3.0        | 5.1             | 10.7                | 10.2                     | 3.6                        | 3.6                             |
| <b>TS11d</b> | 7.8        | 10.2            | 15.5                | 15.3                     | 8.4                        | 8.7                             |

\*  $\Delta G$ : relative Gibbs free energy with respect to the individual reactants;  $\Delta G^\ddagger$ : free energy barrier;  $\Delta \Delta G^\ddagger$ : relative free energy barrier with respect to the most stable TS; CP: counterpoise correction for the BSSE.

It can be seen that although the BSSE correction has some influence on the  $\Delta G$  values (with average 2.5 kcal/mol), only very little influence on the  $\Delta G^\ddagger$  and  $\Delta\Delta G^\ddagger$ , which are responsible for the reaction rate and stereoselectivity of the reaction. Accordingly, only the data without BSSE correction were given and discussed in the manuscript.

**3. Table S3.** Some donor-acceptor interactions in **TS11a** and **TS11b** and their second order perturbation stabilization energies,  $E(2)$  (kcal/mol)

| <b>TS11a</b> | <b>Donor NBO (i)</b>                 | <b>Acceptor NBO (j)</b>               | <b><math>E(2)</math> kcal/mol</b> |
|--------------|--------------------------------------|---------------------------------------|-----------------------------------|
|              | carbene to styrene                   |                                       |                                   |
|              | 1. $\sigma(\text{Rh2} - \text{C39})$ | 553. $\pi^*(\text{C46} - \text{C48})$ | 3.38                              |
|              | 28. $\pi(\text{C31} - \text{C36})$   | 563. $\pi^*(\text{C53} - \text{C56})$ | 0.11                              |
|              | 36. $\pi(\text{C34} - \text{C35})$   | 553. $\pi^*(\text{C46} - \text{C48})$ | 0.09                              |
|              | 36. $\pi(\text{C34} - \text{C35})$   | 558. $\pi^*(\text{C51} - \text{C52})$ | 0.27                              |
|              | 36. $\pi(\text{C34} - \text{C35})$   | 563. $\pi^*(\text{C53} - \text{C56})$ | 0.12                              |
|              | 45. $\pi(\text{C38} - \text{O40})$   | 553. $\pi^*(\text{C46} - \text{C48})$ | 0.06                              |
|              | 154. $\text{LP}^*\text{C39}$         | 553. $\pi^*(\text{C46} - \text{C48})$ | 16.09                             |
|              | styrene to carbene                   |                                       |                                   |
|              | 48. $\pi(\text{C46} - \text{C48})$   | 154. $\text{LP}^*\text{C39}$          | 35.83                             |
|              | 48. $\pi(\text{C46} - \text{C48})$   | 541. $\pi^*(\text{C34} - \text{C35})$ | 0.09                              |
|              | 48. $\pi(\text{C46} - \text{C48})$   | 550. $\pi^*(\text{C38} - \text{O40})$ | 1.73                              |
|              | 53. $\pi(\text{C51} - \text{C52})$   | 541. $\pi^*(\text{C34} - \text{C35})$ | 0.07                              |
| <b>TS11b</b> | <b>Donor NBO (i)</b>                 | <b>Acceptor NBO (j)</b>               | <b><math>E(2)</math> kcal/mol</b> |
|              | carbene to styrene                   |                                       |                                   |
|              | 1. $\sigma(\text{Rh2} - \text{C39})$ | 553. $\pi^*(\text{C46} - \text{C48})$ | 3.14                              |
|              | 36. $\pi(\text{C34} - \text{C35})$   | 553. $\pi^*(\text{C46} - \text{C48})$ | 0.22                              |
|              | 45. $\pi(\text{C38} - \text{O40})$   | 558. $\pi^*(\text{C51} - \text{C52})$ | 0.07                              |
|              | 45. $\pi(\text{C38} - \text{O40})$   | 563. $\pi^*(\text{C53} - \text{C56})$ | 0.5                               |
|              | 154. $\text{LP}^*\text{C39}$         | 553. $\pi^*(\text{C46} - \text{C48})$ | 15.23                             |
|              | styrene to carbene                   |                                       |                                   |
|              | 48. $\pi(\text{C46} - \text{C48})$   | 154. $\text{LP}^*\text{C39}$          | 33.15                             |
|              | 48. $\pi(\text{C46} - \text{C48})$   | 541. $\pi^*(\text{C34} - \text{C35})$ | 0.06                              |
|              | 48. $\pi(\text{C46} - \text{C48})$   | 550. $\pi^*(\text{C38} - \text{O40})$ | 1.28                              |
|              | 58. $\pi(\text{C53} - \text{C56})$   | 550. $\pi^*(\text{C38} - \text{O40})$ | 0.12                              |

4. **Table S4.** Natural charge on different parts of species in the Rh<sub>2</sub>(OAc)<sub>4</sub>-catalyzed reaction.

| Comp.         | Rh <sup>1</sup> | Rh <sup>2</sup> | carboxylate groups | N <sub>2</sub> | carbenoid ligand (carbene carbon) | styrene |
|---------------|-----------------|-----------------|--------------------|----------------|-----------------------------------|---------|
| <b>1</b>      |                 |                 |                    | 0.13           | -0.13 (-0.08)                     |         |
| <b>3</b>      | 0.71            | 0.71            | -1.42              |                |                                   |         |
| <b>4</b>      | 0.51            | 0.67            | -1.35              | 0.26           | -0.09 (-0.17)                     |         |
| <b>TS9</b>    | 0.47            | 0.57            | -1.33              | 0.22           | 0.07 (-0.06)                      |         |
| <b>10</b>     | 0.47            | 0.50            | -1.31              |                | 0.33 (0.04)                       |         |
| <b>TS11-a</b> | 0.48            | 0.51            | -1.37              |                | 0.09 (-0.05)                      | 0.29    |
| <b>TS11-b</b> | 0.48            | 0.51            | -1.36              |                | 0.09 (-0.04)                      | 0.28    |
| <b>TS11-c</b> | 0.48            | 0.50            | -1.39              |                | 0.02 (-0.06)                      | 0.38    |
| <b>TS11-d</b> | 0.49            | 0.51            | -1.38              |                | -0.01 (-0.07)                     | 0.38    |

5. **Table S5.** Natural charge on different parts of species in Rh<sub>2</sub>(S-PTTL)<sub>4</sub>-catalyzed reaction.

| Comp.         | Rh <sup>1</sup> | Rh <sup>2</sup> | carboxylate groups | N <sub>2</sub> | carbenoid ligand (carbene carbon) | styrene |
|---------------|-----------------|-----------------|--------------------|----------------|-----------------------------------|---------|
| <b>1</b>      |                 |                 |                    | 0.13           | -0.13 (-0.08)                     |         |
| <b>13</b>     | 0.73            | 0.74            | -1.47              |                |                                   |         |
| <b>14</b>     | 0.54            | 0.73            | -1.45              | 0.27           | -0.08 (-0.17)                     |         |
| <b>TS15</b>   | 0.47            | 0.65            | -1.44              | 0.22           | 0.09 (-0.06)                      |         |
| <b>16</b>     | 0.47            | 0.59            | -1.41              |                | 0.36 (0.05)                       |         |
| <b>TS17-a</b> | 0.48            | 0.61            | -1.49              |                | 0.10 (-0.05)                      | 0.30    |
| <b>TS17-b</b> | 0.48            | 0.61            | -1.49              |                | 0.10 (-0.05)                      | 0.30    |
| <b>TS17-c</b> | 0.48            | 0.62            | -1.48              |                | 0.10 (-0.03)                      | 0.28    |
| <b>TS17-d</b> | 0.48            | 0.61            | -1.48              |                | 0.11 (-0.04)                      | 0.28    |
| <b>TS17-e</b> | 0.49            | 0.60            | -1.51              |                | 0.04 (-0.07)                      | 0.38    |

6. **Figure S1.** Energy profile for the uncatalyzed cyclopropanation of diazooxindole and styrene for the *Re*-face pathway.

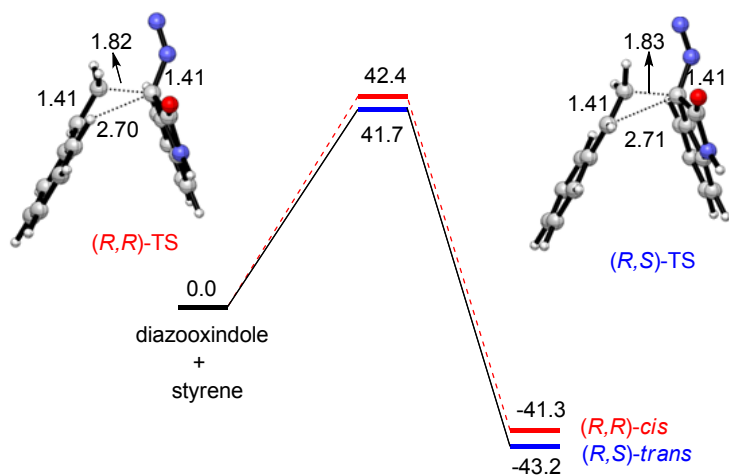

7. **Figure S2.** Comparison between the DFT and x-ray (in parentheses) structure of  $\text{Rh}_2(\text{OAc})_4$

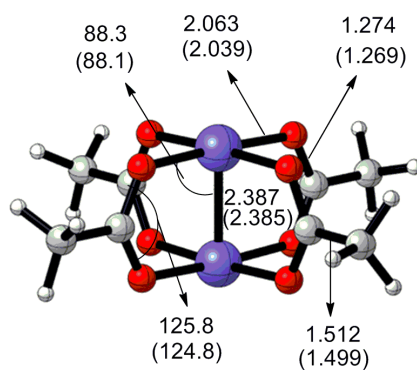

8. **Figure. S3.** Potential complexes formed between diazooxindole **1** and  $\text{Rh}_2(\text{OAc})_4$  **3** (**4**, **5** and **6**) or between styrene **2** and **3** (**7** and **8**). Values in parentheses are relative free energies (in kcal/mol) relative to isolated reactants.

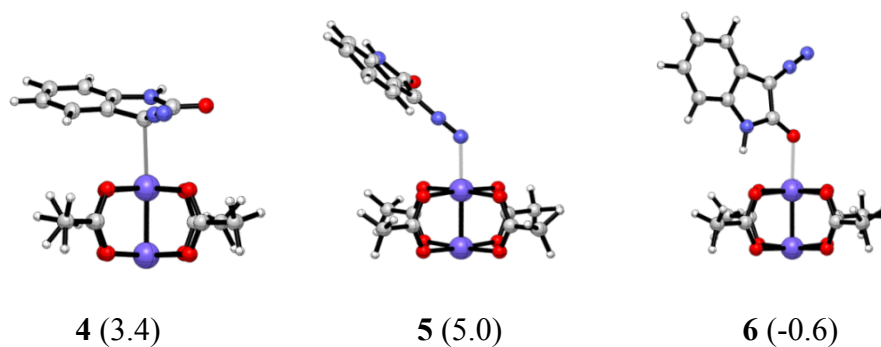



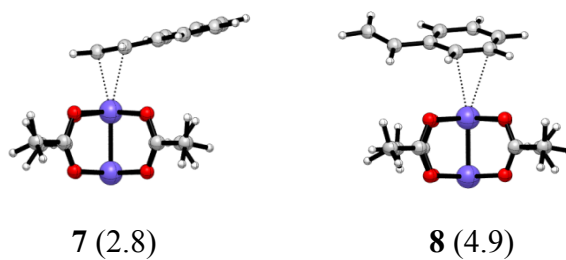

9. **Figure S4.** Calculated structures (top view) of the stationary points involved in the  $\text{Rh}_2(\text{OAc})_4$  catalyzed cyclopropanation.

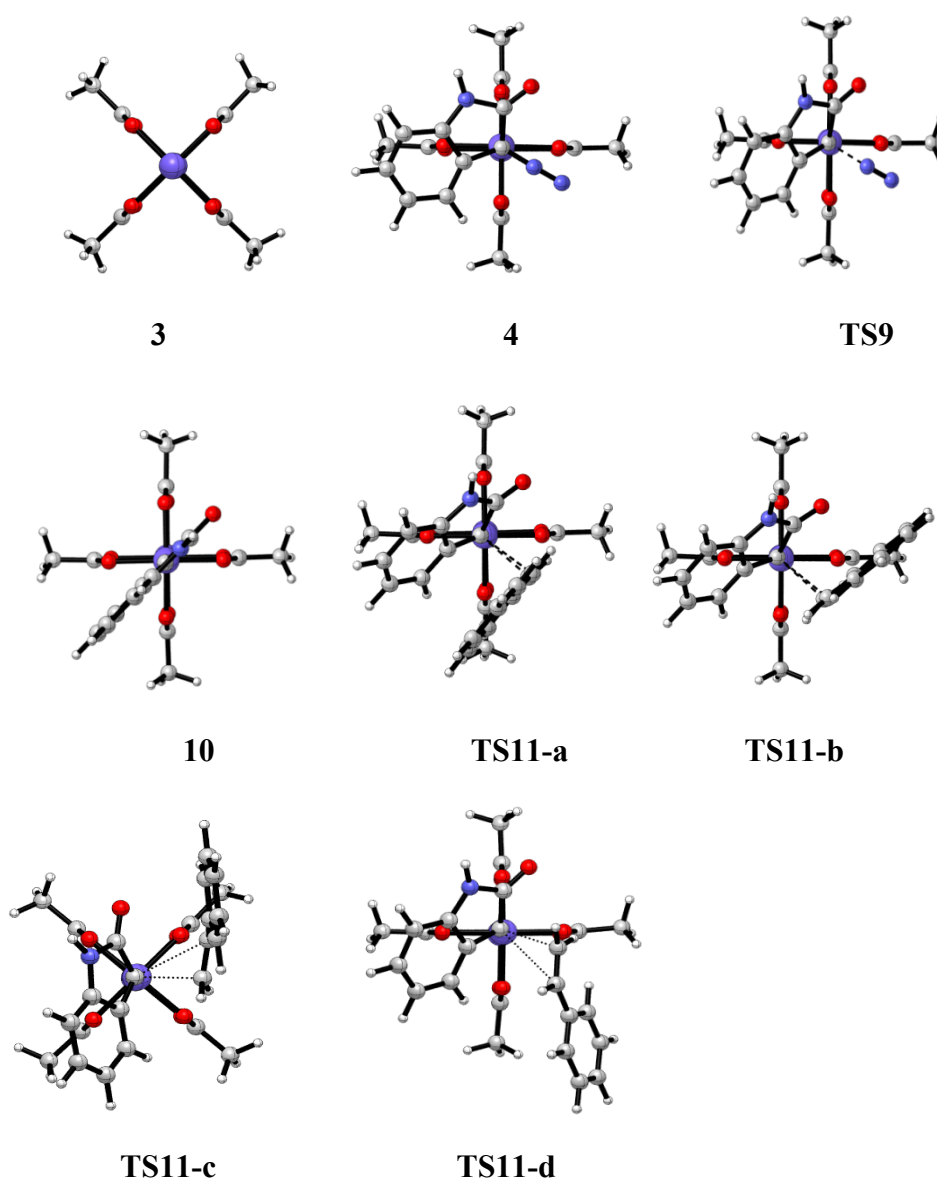

**10. Figure S5.** Diagram of LUMO of diazooxindole **1** (left) and carbenoid complex **10** (right)

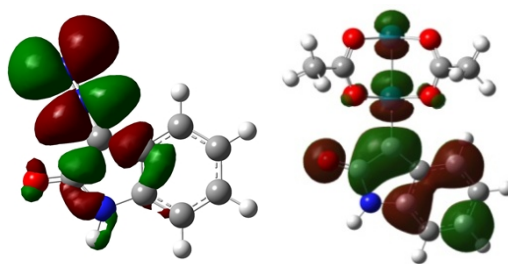

**11. Analysis of other four attack models in Rh<sub>2</sub>(OAc)<sub>4</sub>-catalyzed reaction**

All our efforts to locate the *endo* transition structures for **TS11-a**, **TS11-b** and **TS11-c** were unsuccessful; instead, the styrene rotated upon optimization around the approach vector (C1-C2 bond) to afford an *exo* orientation. This effect might be due to the steric repulsion with the catalyst. Regarding the *side-on-trans-exo model*, although a suspected TS was located, it was denied by following IRC analysis.

***End-on -trans-endo model***

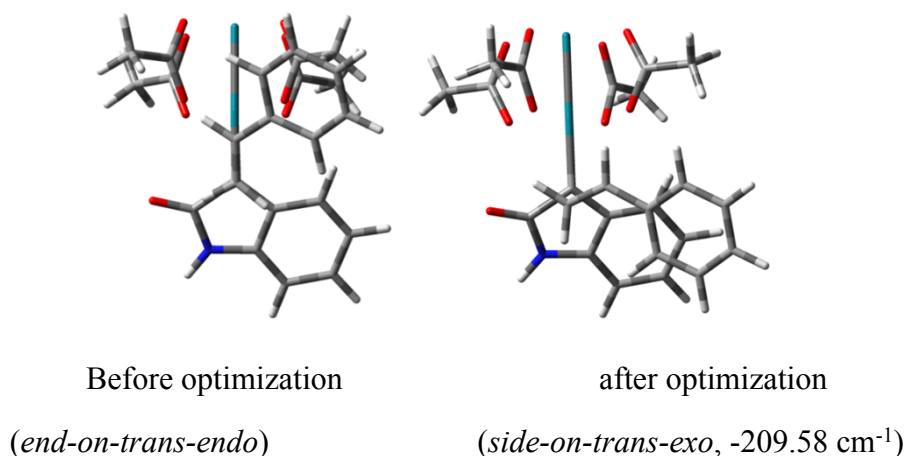

***End-on -cis-endo model***

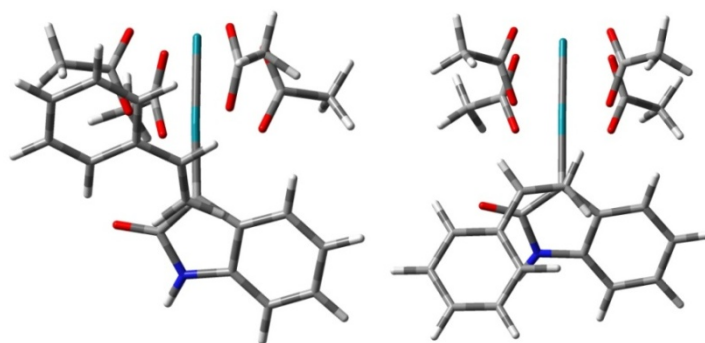

Before opt (*end-on-cis-endo*)    after opt (*side-on-cis-exo*, -192.50 cm<sup>-1</sup>)

***Side-on -cis-endo model***

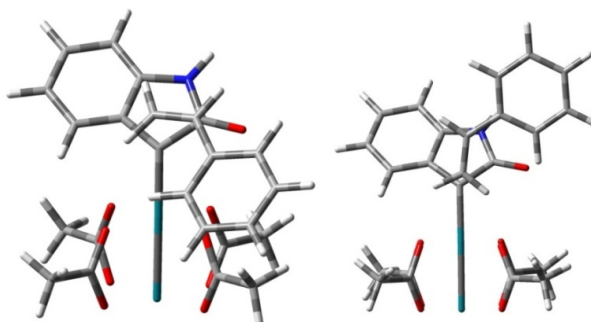

Before opt (*side-on-cis-endo*)

after opt (*end-on-cis-exo*, -152.30 cm<sup>-1</sup>)

***Side-on -trans-exo model***

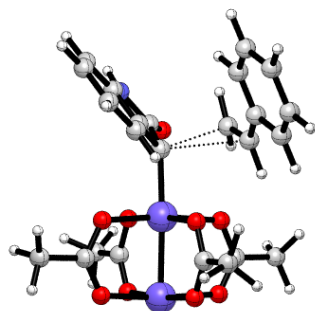

TS (side-view)

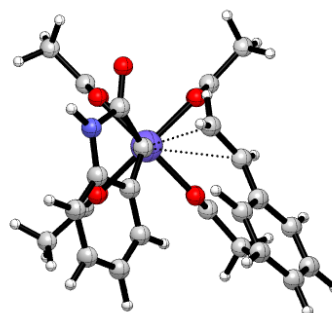

TS (top-view)

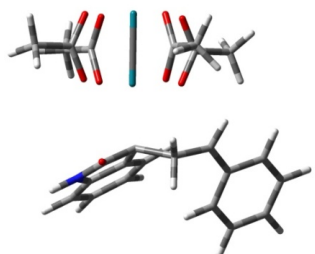

PC

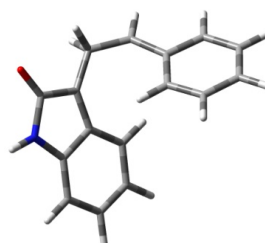

Product

**12. Figure S6.** Optimized structures (top view) of the stationary points involved in the  $\text{Rh}_2(\text{S-PTTL})_4$  catalyzed cyclopropanation.

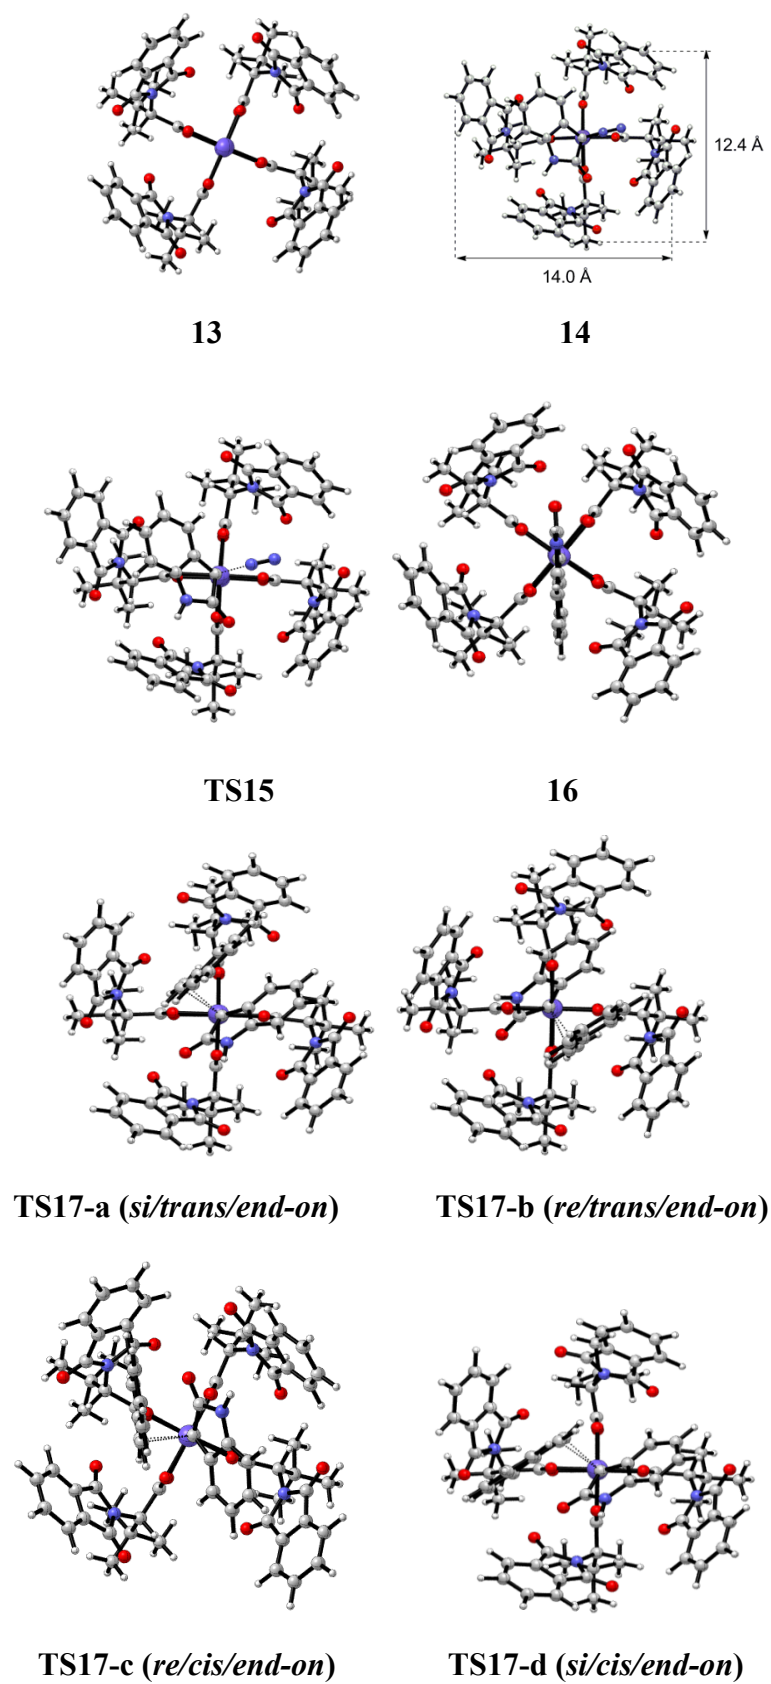

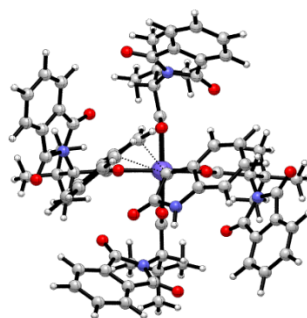

TS17-e (*si/cis/side-on*)

**13. Table S6.** DFT-Computed Energies at the SMD-(D3)B3LYP/6-311+G\*\*

(Lan12DZ)// B3LYP/6-31G\*\*(Lan12DZ) level of theory. The data reported here is BSSE uncorrected.

**Uncatalyzed Model**

| No.                            | SPE <sup>a</sup> | TCH <sup>a</sup> | TCG <sup>a</sup> | H <sup>a</sup> | G <sup>a</sup> | $\Delta H^b$ | $\Delta G^b$ |
|--------------------------------|------------------|------------------|------------------|----------------|----------------|--------------|--------------|
| diazo                          | -547.4854134     | 0.130823         | 0.086594         | -547.35459     | -547.3988      |              |              |
| styrene                        | -309.7520696     | 0.141445         | 0.102245         | -309.61062     | -309.6498      |              |              |
| N2                             | -109.5544237     | 0.008904         | -0.01285         | -109.54552     | -109.5673      |              |              |
| ( <i>S,R</i> )-TS              | -857.1910726     | 0.271968         | 0.208823         | -856.9191      | -856.9822      | 28.9         | 41.7         |
| ( <i>S,S</i> )-TS              | -857.1906483     | 0.272103         | 0.209533         | -856.91855     | -856.9811      | 29.3         | 42.4         |
| ( <i>R,S</i> )-TS              | -857.1910637     | 0.271971         | 0.208868         | -856.91909     | -856.9822      | 28.9         | 41.7         |
| ( <i>R,R</i> )-TS              | -857.1906428     | 0.272103         | 0.209533         | -856.91854     | -856.9811      | 29.3         | 42.4         |
| ( <i>S,R</i> )- <i>trans-P</i> | -747.7583842     | 0.264402         | 0.208098         | -747.49398     | -747.5503      | -46.6        | -43.2        |
| ( <i>S,S</i> )- <i>cis-P</i>   | -747.7555484     | 0.264375         | 0.208383         | -747.49117     | -747.5472      | -44.9        | -41.3        |
| ( <i>R,S</i> )- <i>trans-P</i> | -747.7583855     | 0.264402         | 0.208096         | -747.49398     | -747.5503      | -46.6        | -43.2        |
| ( <i>R,R</i> )- <i>cis-P</i>   | -747.7555556     | 0.26437          | 0.208362         | -747.49119     | -747.5472      | -44.9        | -41.3        |

<sup>a</sup> in hartree; <sup>b</sup> in kcal/mol.

**Rh<sub>2</sub>(OAc)<sub>4</sub> Model**

| No.    | SPE          | TCH      | TCG       | H            | G            | $\Delta H$ | $\Delta G$ |
|--------|--------------|----------|-----------|--------------|--------------|------------|------------|
| 1      | -547.4854134 | 0.130823 | 0.086594  | -547.3545904 | -547.3988194 |            |            |
| 2      | -309.7520696 | 0.141445 | 0.102245  | -309.6106246 | -309.6498246 |            |            |
| 3      | -1133.466258 | 0.233105 | 0.158468  | -1133.233153 | -1133.30779  |            |            |
| N2     | -109.5544237 | 0.008904 | -0.012851 | -109.5455197 | -109.5672747 |            |            |
| 4      | -1680.966521 | 0.366466 | 0.265346  | -1680.600055 | -1680.701175 | -7.7       | 3.4        |
| TS9    | -1680.939426 | 0.363761 | 0.262882  | -1680.575665 | -1680.676544 | 7.6        | 18.9       |
| 10     | -1571.409114 | 0.353361 | 0.257548  | -1571.055753 | -1571.151566 | -8.5       | -7.7       |
| TS11-a | -1881.174697 | 0.497372 | 0.384651  | -1880.677325 | -1880.790046 | -15.4      | -0.6       |

|               |              |          |          |              |              |       |     |
|---------------|--------------|----------|----------|--------------|--------------|-------|-----|
| <b>TS11-b</b> | -1881.171175 | 0.497321 | 0.38399  | -1880.673854 | -1880.787185 | -13.2 | 1.2 |
| <b>TS11-c</b> | -1881.168369 | 0.49738  | 0.384069 | -1880.670989 | -1880.7843   | -11.4 | 3.0 |
| <b>TS11-d</b> | -1881.165337 | 0.496503 | 0.38864  | -1880.668834 | -1880.776697 | -10.0 | 7.8 |

### *Rh<sub>2</sub>(S-PTTL)<sub>4</sub> Model*

| No.           | SPE          | TCH      | TCG       | H          | G          | ΔH    | ΔG    |
|---------------|--------------|----------|-----------|------------|------------|-------|-------|
| <b>1</b>      | -547.4854134 | 0.130823 | 0.086594  | -547.35459 | -547.39882 |       |       |
| <b>2</b>      | -309.7520696 | 0.141445 | 0.102245  | -309.61062 | -309.64982 |       |       |
| <b>13</b>     | -3810.967386 | 1.128865 | 0.940747  | -3809.8385 | -3810.0266 |       |       |
| <b>N2</b>     | -109.5544237 | 0.008904 | -0.012851 | -109.54552 | -109.56727 |       |       |
| <b>14</b>     | -4358.485108 | 1.261212 | 1.050698  | -4357.2239 | -4357.4344 | -19.3 | -5.6  |
| <b>TS15</b>   | -4358.45902  | 1.258354 | 1.046865  | -4357.2007 | -4357.4122 | -4.7  | 8.3   |
| <b>16</b>     | -4248.923085 | 1.249153 | 1.041267  | -4247.6739 | -4247.8818 | -16.5 | -14.8 |
| <b>TS17-a</b> | -4558.697398 | 1.391833 | 1.167976  | -4557.3056 | -4557.5294 | -29.7 | -13.4 |
| <b>TS17-b</b> | -4558.696281 | 1.391814 | 1.16782   | -4557.3045 | -4557.5285 | -29.0 | -12.8 |
| <b>TS17-c</b> | -4558.692872 | 1.391739 | 1.166864  | -4557.3011 | -4557.5260 | -26.9 | -11.3 |
| <b>TS17-d</b> | -4558.695065 | 1.392142 | 1.169178  | -4557.3029 | -4557.5259 | -28.1 | -11.2 |
| <b>TS17-e</b> | -4558.692001 | 1.39234  | 1.16889   | -4557.2997 | -4557.5231 | -26.0 | -9.5  |

## 14. Computed Molecular Cartesian Coordinates and Energies

### 11.1 Uncatalyzed reaction (Diazooxindole+Styrene)

Styrene:

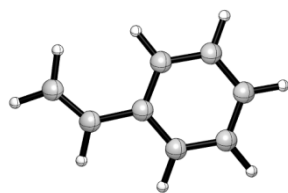

|                                              |                             |
|----------------------------------------------|-----------------------------|
| Zero-point correction=                       | 0.133730 (Hartree/Particle) |
| Thermal correction to Energy=                | 0.140501                    |
| Thermal correction to Enthalpy=              | 0.141445                    |
| Thermal correction to Gibbs Free Energy=     | 0.102245                    |
| Sum of electronic and zero-point Energies=   | -309.514529                 |
| Sum of electronic and thermal Energies=      | -309.507758                 |
| Sum of electronic and thermal Enthalpies=    | -309.506814                 |
| Sum of electronic and thermal Free Energies= | -309.546014                 |

---

| Center Number | Atomic Number | Atomic Type | Coordinates (Angstroms) |   |   |
|---------------|---------------|-------------|-------------------------|---|---|
|               |               |             | X                       | Y | Z |

|    |   |   |           |           |           |
|----|---|---|-----------|-----------|-----------|
| 1  | 6 | 0 | -1.954787 | -0.529189 | 0.000003  |
| 2  | 1 | 0 | -2.186223 | -1.594644 | 0.000009  |
| 3  | 6 | 0 | -2.977439 | 0.335025  | 0.000000  |
| 4  | 1 | 0 | -2.840465 | 1.413065  | -0.000005 |
| 5  | 1 | 0 | -4.004454 | -0.016959 | 0.000004  |
| 6  | 6 | 0 | -0.515243 | -0.220389 | -0.000002 |
| 7  | 6 | 0 | 0.406474  | -1.281406 | -0.000009 |
| 8  | 6 | 0 | -0.008781 | 1.092337  | 0.000003  |
| 9  | 6 | 0 | 1.780747  | -1.046218 | 0.000004  |
| 10 | 1 | 0 | 0.034889  | -2.303863 | -0.000011 |
| 11 | 6 | 0 | 1.362395  | 1.329552  | -0.000005 |
| 12 | 1 | 0 | -0.693815 | 1.935298  | 0.000001  |
| 13 | 6 | 0 | 2.265350  | 0.261853  | 0.000001  |
| 14 | 1 | 0 | 2.471854  | -1.885075 | 0.000016  |
| 15 | 1 | 0 | 1.730422  | 2.352349  | 0.000001  |
| 16 | 1 | 0 | 3.335503  | 0.450450  | 0.000003  |

### Diazooxindole

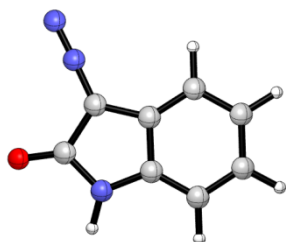

|                                              |                             |
|----------------------------------------------|-----------------------------|
| Zero-point correction=                       | 0.120954 (Hartree/Particle) |
| Thermal correction to Energy=                | 0.129879                    |
| Thermal correction to Enthalpy=              | 0.130823                    |
| Thermal correction to Gibbs Free Energy=     | 0.086594                    |
| Sum of electronic and zero-point Energies=   | -547.187186                 |
| Sum of electronic and thermal Energies=      | -547.178262                 |
| Sum of electronic and thermal Enthalpies=    | -547.177318                 |
| Sum of electronic and thermal Free Energies= | -547.221547                 |

| Center Number | Atomic Number | Atomic Type | Coordinates (Angstroms) |           |           |
|---------------|---------------|-------------|-------------------------|-----------|-----------|
|               |               |             | X                       | Y         | Z         |
| 1             | 6             | 0           | 2.595592                | 1.255839  | 0.000057  |
| 2             | 6             | 0           | 3.065842                | -0.060635 | 0.000166  |
| 3             | 6             | 0           | 2.181109                | -1.146200 | 0.000146  |
| 4             | 6             | 0           | 0.818651                | -0.876614 | -0.000046 |
| 5             | 6             | 0           | 0.333305                | 0.453382  | -0.000175 |
| 6             | 6             | 0           | 1.222432                | 1.524406  | -0.000087 |

|    |   |   |           |           |           |
|----|---|---|-----------|-----------|-----------|
| 7  | 7 | 0 | -0.263342 | -1.758640 | 0.000026  |
| 8  | 6 | 0 | -1.496978 | -1.108263 | -0.000363 |
| 9  | 6 | 0 | -1.115437 | 0.330585  | -0.000376 |
| 10 | 8 | 0 | -2.598233 | -1.627039 | -0.000108 |
| 11 | 1 | 0 | 3.301247  | 2.081148  | 0.000101  |
| 12 | 1 | 0 | 4.135334  | -0.250008 | 0.000305  |
| 13 | 1 | 0 | 2.549748  | -2.167993 | 0.000284  |
| 14 | 1 | 0 | 0.859982  | 2.548666  | -0.000165 |
| 15 | 1 | 0 | -0.203588 | -2.766485 | 0.000049  |
| 16 | 7 | 0 | -2.005020 | 1.281324  | -0.000282 |
| 17 | 7 | 0 | -2.800774 | 2.096744  | 0.000879  |

-----

**Si-trans-ts**

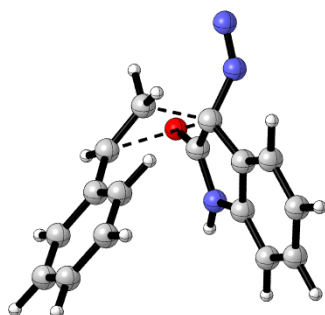

|                                              |                             |
|----------------------------------------------|-----------------------------|
| Zero-point correction=                       | 0.254636 (Hartree/Particle) |
| Thermal correction to Energy=                | 0.271024                    |
| Thermal correction to Enthalpy=              | 0.271968                    |
| Thermal correction to Gibbs Free Energy=     | 0.208823                    |
| Sum of electronic and zero-point Energies=   | -856.645983                 |
| Sum of electronic and thermal Energies=      | -856.629595                 |
| Sum of electronic and thermal Enthalpies=    | -856.628651                 |
| Sum of electronic and thermal Free Energies= | -856.691796                 |

-----

| Center<br>Number | Atomic<br>Number | Atomic<br>Type | Coordinates (Angstroms) |           |           |
|------------------|------------------|----------------|-------------------------|-----------|-----------|
| Z                |                  |                | X                       | Y         | Z         |
| 1                | 6                | 0              | 0.556284                | 3.058861  | -0.884621 |
| 2                | 6                | 0              | 0.316362                | 3.352093  | 0.460198  |
| 3                | 6                | 0              | 0.579582                | 2.417570  | 1.469344  |
| 4                | 6                | 0              | 1.088383                | 1.183766  | 1.085546  |
| 5                | 6                | 0              | 1.318182                | 0.868728  | -0.265093 |
| 6                | 6                | 0              | 1.056187                | 1.804785  | -1.256478 |
| 7                | 7                | 0              | 1.470126                | 0.098370  | 1.886822  |
| 8                | 6                | 0              | 1.989002                | -0.949039 | 1.152607  |
| 9                | 6                | 0              | 1.783138                | -0.549222 | -0.332752 |



|    |   |   |           |           |           |
|----|---|---|-----------|-----------|-----------|
| 10 | 8 | 0 | 2.451844  | -1.985317 | 1.574283  |
| 11 | 1 | 0 | 0.350867  | 3.805006  | -1.645924 |
| 12 | 1 | 0 | -0.079932 | 4.325639  | 0.734451  |
| 13 | 1 | 0 | 0.398160  | 2.655770  | 2.513146  |
| 14 | 1 | 0 | 1.244794  | 1.572763  | -2.301279 |
| 15 | 1 | 0 | 1.426393  | 0.069902  | 2.896143  |
| 16 | 7 | 0 | 2.957474  | -0.796650 | -1.080941 |
| 17 | 7 | 0 | 3.362916  | -1.521540 | -1.891006 |
| 18 | 6 | 0 | 0.513983  | -1.688011 | -0.999148 |
| 19 | 1 | 0 | 0.324133  | -1.201721 | -1.958231 |
| 20 | 1 | 0 | 1.187944  | -2.545313 | -1.116149 |
| 21 | 6 | 0 | -0.580042 | -1.858064 | -0.133371 |
| 22 | 1 | 0 | -0.447195 | -2.557778 | 0.690098  |
| 23 | 6 | 0 | -1.842277 | -1.165821 | -0.166260 |
| 24 | 6 | 0 | -2.813940 | -1.459907 | 0.823144  |
| 25 | 6 | 0 | -2.195231 | -0.209235 | -1.150972 |
| 26 | 6 | 0 | -4.058791 | -0.842294 | 0.827161  |
| 27 | 1 | 0 | -2.572374 | -2.192696 | 1.589953  |
| 28 | 6 | 0 | -3.440534 | 0.406626  | -1.141964 |
| 29 | 1 | 0 | -1.481970 | 0.053472  | -1.926087 |
| 30 | 6 | 0 | -4.383661 | 0.097907  | -0.155381 |
| 31 | 1 | 0 | -4.781330 | -1.094018 | 1.599598  |
| 32 | 1 | 0 | -3.681278 | 1.135962  | -1.911601 |
| 33 | 1 | 0 | -5.356341 | 0.581835  | -0.154279 |

---

### Si-trans-cyclopropane

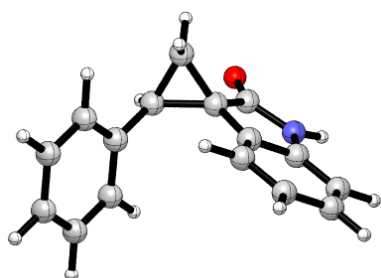

|                                              |                             |
|----------------------------------------------|-----------------------------|
| Zero-point correction=                       | 0.249702 (Hartree/Particle) |
| Thermal correction to Energy=                | 0.263458                    |
| Thermal correction to Enthalpy=              | 0.264402                    |
| Thermal correction to Gibbs Free Energy=     | 0.208098                    |
| Sum of electronic and zero-point Energies=   | -747.257533                 |
| Sum of electronic and thermal Energies=      | -747.243777                 |
| Sum of electronic and thermal Enthalpies=    | -747.242833                 |
| Sum of electronic and thermal Free Energies= | -747.299137                 |

---

| Center | Atomic | Atomic | Coordinates (Angstroms) |
|--------|--------|--------|-------------------------|
|--------|--------|--------|-------------------------|

| Number<br>Z | Number | Type | X         | Y         |           |
|-------------|--------|------|-----------|-----------|-----------|
| 1           | 6      | 0    | 1.269674  | 2.753044  | -0.676948 |
| 2           | 6      | 0    | 2.514213  | 2.787172  | -0.045811 |
| 3           | 6      | 0    | 3.111670  | 1.615386  | 0.436105  |
| 4           | 6      | 0    | 2.423100  | 0.421378  | 0.264870  |
| 5           | 6      | 0    | 1.164468  | 0.367723  | -0.370375 |
| 6           | 6      | 0    | 0.586984  | 1.539612  | -0.843069 |
| 7           | 7      | 0    | 2.799851  | -0.873530 | 0.647083  |
| 8           | 6      | 0    | 1.852926  | -1.820788 | 0.292997  |
| 9           | 6      | 0    | 0.739683  | -1.055484 | -0.381052 |
| 10          | 8      | 0    | 1.919534  | -3.021161 | 0.497723  |
| 11          | 1      | 0    | 0.823492  | 3.673443  | -1.042166 |
| 12          | 1      | 0    | 3.032436  | 3.734473  | 0.075393  |
| 13          | 1      | 0    | 4.081498  | 1.642150  | 0.925211  |
| 14          | 1      | 0    | -0.383830 | 1.520206  | -1.328962 |
| 15          | 1      | 0    | 3.658276  | -1.121857 | 1.118031  |
| 16          | 6      | 0    | -0.023426 | -1.756369 | -1.495063 |
| 17          | 1      | 0    | -0.342138 | -1.123660 | -2.319014 |
| 18          | 1      | 0    | 0.341053  | -2.741247 | -1.773715 |
| 19          | 6      | 0    | -0.689162 | -1.602127 | -0.172150 |
| 20          | 1      | 0    | -0.674828 | -2.497217 | 0.449717  |
| 21          | 6      | 0    | -1.850158 | -0.687121 | 0.061363  |
| 22          | 6      | 0    | -2.038701 | -0.108954 | 1.325929  |
| 23          | 6      | 0    | -2.786932 | -0.416876 | -0.944445 |
| 24          | 6      | 0    | -3.130115 | 0.720635  | 1.576050  |
| 25          | 1      | 0    | -1.317930 | -0.309922 | 2.114639  |
| 26          | 6      | 0    | -3.880401 | 0.416289  | -0.697265 |
| 27          | 1      | 0    | -2.666947 | -0.872500 | -1.923670 |
| 28          | 6      | 0    | -4.054573 | 0.988185  | 0.563025  |
| 29          | 1      | 0    | -3.258155 | 1.161687  | 2.561060  |
| 30          | 1      | 0    | -4.598307 | 0.612263  | -1.489491 |
| 31          | 1      | 0    | -4.905354 | 1.635958  | 0.756651  |

Si-cis-TS

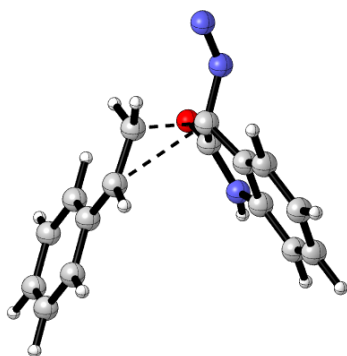

Zero-point correction= 0.254833 (Hartree/Particle)  
 Thermal correction to Energy= 0.271159  
 Thermal correction to Enthalpy= 0.272103  
 Thermal correction to Gibbs Free Energy= 0.209533  
 Sum of electronic and zero-point Energies= -856.646924  
 Sum of electronic and thermal Energies= -856.630598  
 Sum of electronic and thermal Enthalpies= -856.629653  
 Sum of electronic and thermal Free Energies= -856.692224

| Center<br>Number | Atomic<br>Number | Atomic<br>Type | Coordinates (Angstroms) |           |           |
|------------------|------------------|----------------|-------------------------|-----------|-----------|
|                  |                  |                | X                       | Y         | Z         |
| 1                | 6                | 0              | -3.278056               | -2.055444 | -0.806225 |
| 2                | 6                | 0              | -2.832817               | -2.773585 | 0.306181  |
| 3                | 6                | 0              | -1.953547               | -2.206507 | 1.237749  |
| 4                | 6                | 0              | -1.539101               | -0.899616 | 1.016485  |
| 5                | 6                | 0              | -1.969270               | -0.171012 | -0.105926 |
| 6                | 6                | 0              | -2.840454               | -0.741879 | -1.021860 |
| 7                | 7                | 0              | -0.699196               | -0.094064 | 1.798286  |
| 8                | 6                | 0              | -0.550081               | 1.176906  | 1.283276  |
| 9                | 6                | 0              | -1.268665               | 1.153296  | -0.088497 |
| 10               | 8                | 0              | 0.062656                | 2.101831  | 1.771930  |
| 11               | 1                | 0              | -3.964451               | -2.517271 | -1.509152 |
| 12               | 1                | 0              | -3.174859               | -3.793414 | 0.458263  |
| 13               | 1                | 0              | -1.615994               | -2.769114 | 2.103037  |
| 14               | 1                | 0              | -3.182174               | -0.180001 | -1.886844 |
| 15               | 1                | 0              | -0.248152               | -0.374970 | 2.658087  |
| 16               | 7                | 0              | -2.118261               | 2.272151  | -0.250473 |
| 17               | 7                | 0              | -2.305232               | 3.159804  | -0.973722 |
| 18               | 6                | 0              | 0.025729                | 1.314853  | -1.351151 |
| 19               | 1                | 0              | -0.641495               | 1.540276  | -2.191666 |
| 20               | 1                | 0              | 0.505989                | 2.224741  | -0.984226 |
| 21               | 6                | 0              | 0.825129                | 0.163007  | -1.474689 |
| 22               | 1                | 0              | 0.431646                | -0.649238 | -2.083164 |

|    |   |   |          |           |           |
|----|---|---|----------|-----------|-----------|
| 23 | 6 | 0 | 2.085111 | -0.100860 | -0.829722 |
| 24 | 6 | 0 | 2.741109 | -1.332080 | -1.083931 |
| 25 | 6 | 0 | 2.735117 | 0.810414  | 0.041778  |
| 26 | 6 | 0 | 3.971873 | -1.632167 | -0.513242 |
| 27 | 1 | 0 | 2.264988 | -2.049947 | -1.748314 |
| 28 | 6 | 0 | 3.964692 | 0.502389  | 0.611600  |
| 29 | 1 | 0 | 2.263589 | 1.757046  | 0.285072  |
| 30 | 6 | 0 | 4.595621 | -0.716910 | 0.340400  |
| 31 | 1 | 0 | 4.448922 | -2.584080 | -0.733420 |
| 32 | 1 | 0 | 4.437332 | 1.220750  | 1.276862  |
| 33 | 1 | 0 | 5.557888 | -0.949493 | 0.788030  |

---

### Si-cis-cyclopropane

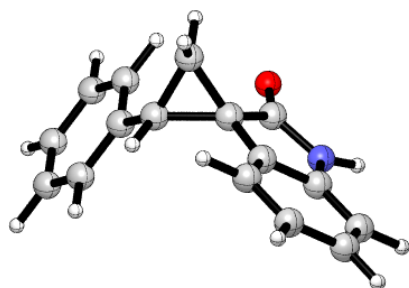

|                                              |                             |
|----------------------------------------------|-----------------------------|
| Zero-point correction=                       | 0.249711 (Hartree/Particle) |
| Thermal correction to Energy=                | 0.263430                    |
| Thermal correction to Enthalpy=              | 0.264375                    |
| Thermal correction to Gibbs Free Energy=     | 0.208383                    |
| Sum of electronic and zero-point Energies=   | -747.255163                 |
| Sum of electronic and thermal Energies=      | -747.241443                 |
| Sum of electronic and thermal Enthalpies=    | -747.240499                 |
| Sum of electronic and thermal Free Energies= | -747.296491                 |

---

| Center Number | Atomic Number | Atomic Type | Coordinates (Angstroms) |           |           |
|---------------|---------------|-------------|-------------------------|-----------|-----------|
|               |               |             | X                       | Y         | Z         |
| 1             | 6             | 0           | 3.864012                | -1.579005 | 0.131183  |
| 2             | 6             | 0           | 4.380129                | -0.669739 | -0.794175 |
| 3             | 6             | 0           | 3.658720                | 0.472117  | -1.166625 |
| 4             | 6             | 0           | 2.413278                | 0.668811  | -0.583391 |
| 5             | 6             | 0           | 1.876124                | -0.240344 | 0.350041  |
| 6             | 6             | 0           | 2.603525                | -1.367379 | 0.707776  |
| 7             | 7             | 0           | 1.502760                | 1.715568  | -0.768788 |
| 8             | 6             | 0           | 0.378274                | 1.587459  | 0.036088  |
| 9             | 6             | 0           | 0.536367                | 0.263274  | 0.744690  |
| 10            | 8             | 0           | -0.513065               | 2.412304  | 0.142338  |

|    |   |   |           |           |           |
|----|---|---|-----------|-----------|-----------|
| 11 | 1 | 0 | 4.441939  | -2.455885 | 0.407960  |
| 12 | 1 | 0 | 5.357754  | -0.845222 | -1.234508 |
| 13 | 1 | 0 | 4.063235  | 1.179237  | -1.885415 |
| 14 | 1 | 0 | 2.207455  | -2.078108 | 1.429645  |
| 15 | 1 | 0 | 1.664432  | 2.544327  | -1.323374 |
| 16 | 6 | 0 | -0.134620 | 0.061621  | 2.086114  |
| 17 | 1 | 0 | 0.428541  | -0.468720 | 2.849923  |
| 18 | 1 | 0 | -0.705356 | 0.913756  | 2.445419  |
| 19 | 6 | 0 | -0.671636 | -0.711487 | 0.930222  |
| 20 | 1 | 0 | -0.317995 | -1.739787 | 0.878653  |
| 21 | 6 | 0 | -2.014366 | -0.544656 | 0.298946  |
| 22 | 6 | 0 | -2.449232 | -1.546520 | -0.583806 |
| 23 | 6 | 0 | -2.874455 | 0.532170  | 0.560376  |
| 24 | 6 | 0 | -3.702365 | -1.479154 | -1.190185 |
| 25 | 1 | 0 | -1.796088 | -2.391191 | -0.792729 |
| 26 | 6 | 0 | -4.127817 | 0.600330  | -0.047568 |
| 27 | 1 | 0 | -2.559191 | 1.331645  | 1.219541  |
| 28 | 6 | 0 | -4.548690 | -0.402140 | -0.922929 |
| 29 | 1 | 0 | -4.017250 | -2.269074 | -1.867148 |
| 30 | 1 | 0 | -4.778193 | 1.444488  | 0.165840  |
| 31 | 1 | 0 | -5.527584 | -0.345025 | -1.391532 |

---

### Re-trans-ts

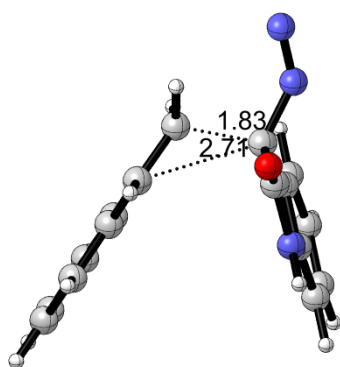

|                                              |                             |
|----------------------------------------------|-----------------------------|
| Zero-point correction=                       | 0.254643 (Hartree/Particle) |
| Thermal correction to Energy=                | 0.271027                    |
| Thermal correction to Enthalpy=              | 0.271971                    |
| Thermal correction to Gibbs Free Energy=     | 0.208868                    |
| Sum of electronic and zero-point Energies=   | -856.645976                 |
| Sum of electronic and thermal Energies=      | -856.629592                 |
| Sum of electronic and thermal Enthalpies=    | -856.628648                 |
| Sum of electronic and thermal Free Energies= | -856.691751                 |

---

| Center<br>Number<br>Z | Atomic<br>Number | Atomic<br>Type | Coordinates (Angstroms) |           |           |
|-----------------------|------------------|----------------|-------------------------|-----------|-----------|
|                       |                  |                | X                       | Y         | Z         |
| 1                     | 6                | 0              | -0.563363               | 3.060845  | -0.882610 |
| 2                     | 6                | 0              | -0.319450               | 3.352485  | 0.461843  |
| 3                     | 6                | 0              | -0.578064               | 2.416151  | 1.470500  |
| 4                     | 6                | 0              | -1.086456               | 1.182203  | 1.086612  |
| 5                     | 6                | 0              | -1.320405               | 0.868842  | -0.263711 |
| 6                     | 6                | 0              | -1.062818               | 1.806637  | -1.254621 |
| 7                     | 7                | 0              | -1.463977               | 0.095099  | 1.887542  |
| 8                     | 6                | 0              | -1.983845               | -0.951966 | 1.153535  |
| 9                     | 6                | 0              | -1.783508               | -0.549653 | -0.331917 |
| 10                    | 8                | 0              | -2.443997               | -1.989414 | 1.575252  |
| 11                    | 1                | 0              | -0.361442               | 3.808354  | -1.643512 |
| 12                    | 1                | 0              | 0.076417                | 4.326177  | 0.736194  |
| 13                    | 1                | 0              | -0.393443               | 2.653078  | 2.514031  |
| 14                    | 1                | 0              | -1.254469               | 1.575812  | -2.299135 |
| 15                    | 1                | 0              | -1.416724               | 0.065151  | 2.896662  |
| 16                    | 7                | 0              | -2.959650               | -0.798487 | -1.076547 |
| 17                    | 7                | 0              | -3.366755               | -1.524667 | -1.884637 |
| 18                    | 6                | 0              | 0.580742                | -1.857818 | -0.140206 |
| 19                    | 1                | 0              | 0.448406                | -2.561077 | 0.680315  |
| 20                    | 6                | 0              | -0.513494               | -1.684386 | -1.004907 |
| 21                    | 1                | 0              | -0.323949               | -1.192536 | -1.961182 |
| 22                    | 1                | 0              | -1.187130               | -2.541370 | -1.126630 |
| 23                    | 6                | 0              | 1.842664                | -1.164796 | -0.170435 |
| 24                    | 6                | 0              | 2.814824                | -1.463011 | 0.817232  |
| 25                    | 6                | 0              | 2.194716                | -0.203354 | -1.150727 |
| 26                    | 6                | 0              | 4.059378                | -0.844807 | 0.823680  |
| 27                    | 1                | 0              | 2.573915                | -2.199520 | 1.580676  |
| 28                    | 6                | 0              | 3.439711                | 0.413099  | -1.139274 |
| 29                    | 1                | 0              | 1.480981                | 0.062793  | -1.924235 |
| 30                    | 6                | 0              | 4.383393                | 0.100166  | -0.154547 |
| 31                    | 1                | 0              | 4.782334                | -1.099786 | 1.594658  |
| 32                    | 1                | 0              | 3.679770                | 1.146220  | -1.905519 |
| 33                    | 1                | 0              | 5.355830                | 0.584576  | -0.151539 |

-----  
**Re-trans-cyclopropane**

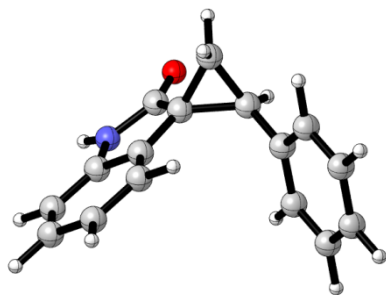

Zero-point correction= 0.249701 (Hartree/Particle)  
 Thermal correction to Energy= 0.263458  
 Thermal correction to Enthalpy= 0.264402  
 Thermal correction to Gibbs Free Energy= 0.208096  
 Sum of electronic and zero-point Energies= -747.257534  
 Sum of electronic and thermal Energies= -747.243777  
 Sum of electronic and thermal Enthalpies= -747.242833  
 Sum of electronic and thermal Free Energies= -747.299139

---

| Center<br>Number | Atomic<br>Number | Atomic<br>Type | Coordinates (Angstroms) |           |           |
|------------------|------------------|----------------|-------------------------|-----------|-----------|
|                  |                  |                | X                       | Y         | Z         |
| 1                | 6                | 0              | -1.270303               | 2.752808  | -0.677476 |
| 2                | 6                | 0              | -2.514801               | 2.786841  | -0.046253 |
| 3                | 6                | 0              | -3.111978               | 1.615029  | 0.435952  |
| 4                | 6                | 0              | -2.423177               | 0.421125  | 0.264893  |
| 5                | 6                | 0              | -1.164605               | 0.367568  | -0.370437 |
| 6                | 6                | 0              | -0.587393               | 1.539459  | -0.843406 |
| 7                | 7                | 0              | -2.799680               | -0.873773 | 0.647428  |
| 8                | 6                | 0              | -1.852769               | -1.820952 | 0.293258  |
| 9                | 6                | 0              | -0.739586               | -1.055617 | -0.380891 |
| 10               | 8                | 0              | -1.919208               | -3.021362 | 0.497986  |
| 11               | 1                | 0              | -0.824277               | 3.673190  | -1.042919 |
| 12               | 1                | 0              | -3.033191               | 3.734068  | 0.074789  |
| 13               | 1                | 0              | -4.081780               | 1.641649  | 0.925117  |
| 14               | 1                | 0              | 0.383388                | 1.520205  | -1.329376 |
| 15               | 1                | 0              | -3.658383               | -1.122265 | 1.117797  |
| 16               | 6                | 0              | 0.689357                | -1.601839 | -0.172101 |
| 17               | 1                | 0              | 0.675239                | -2.497122 | 0.449520  |
| 18               | 6                | 0              | 0.023601                | -1.756123 | -1.495024 |
| 19               | 1                | 0              | 0.342124                | -1.122964 | -2.318716 |
| 20               | 1                | 0              | -0.340440               | -2.741035 | -1.774101 |
| 21               | 6                | 0              | 1.850265                | -0.686771 | 0.061484  |
| 22               | 6                | 0              | 2.038160                | -0.107595 | 1.325673  |
| 23               | 6                | 0              | 2.787713                | -0.417568 | -0.943990 |

|    |   |   |          |           |           |
|----|---|---|----------|-----------|-----------|
| 24 | 6 | 0 | 3.129651 | 0.721914  | 1.575771  |
| 25 | 1 | 0 | 1.316861 | -0.307706 | 2.114116  |
| 26 | 6 | 0 | 3.881257 | 0.415484  | -0.696833 |
| 27 | 1 | 0 | 2.668120 | -0.873929 | -1.922924 |
| 28 | 6 | 0 | 4.054813 | 0.988363  | 0.563109  |
| 29 | 1 | 0 | 3.257174 | 1.163771  | 2.560487  |
| 30 | 1 | 0 | 4.599694 | 0.610634  | -1.488779 |
| 31 | 1 | 0 | 4.905656 | 1.636053  | 0.756734  |

Re-cis-TS

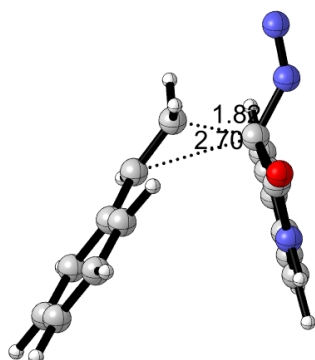

|                                              |                             |
|----------------------------------------------|-----------------------------|
| Zero-point correction=                       | 0.254833 (Hartree/Particle) |
| Thermal correction to Energy=                | 0.271159                    |
| Thermal correction to Enthalpy=              | 0.272103                    |
| Thermal correction to Gibbs Free Energy=     | 0.209533                    |
| Sum of electronic and zero-point Energies=   | -856.646924                 |
| Sum of electronic and thermal Energies=      | -856.630598                 |
| Sum of electronic and thermal Enthalpies=    | -856.629654                 |
| Sum of electronic and thermal Free Energies= | -856.692223                 |

| Center Number | Atomic Number | Atomic Type | Coordinates (Angstroms) |           |           |
|---------------|---------------|-------------|-------------------------|-----------|-----------|
|               |               |             | X                       | Y         | Z         |
| 1             | 6             | 0           | 3.278150                | -2.055300 | -0.806793 |
| 2             | 6             | 0           | 2.833597                | -2.773328 | 0.305961  |
| 3             | 6             | 0           | 1.954723                | -2.206233 | 1.237891  |
| 4             | 6             | 0           | 1.539925                | -0.899459 | 1.016603  |
| 5             | 6             | 0           | 1.969346                | -0.170995 | -0.106185 |
| 6             | 6             | 0           | 2.840212                | -0.741848 | -1.022429 |
| 7             | 7             | 0           | 0.700388                | -0.093874 | 1.798767  |
| 8             | 6             | 0           | 0.550696                | 1.176943  | 1.283551  |
| 9             | 6             | 0           | 1.268626                | 1.153259  | -0.088563 |
| 10            | 8             | 0           | -0.062043               | 2.101815  | 1.772315  |
| 11            | 1             | 0           | 3.964274                | -2.517125 | -1.509985 |



|    |   |   |           |           |           |
|----|---|---|-----------|-----------|-----------|
| 12 | 1 | 0 | 3.175896  | -3.793071 | 0.458046  |
| 13 | 1 | 0 | 1.617742  | -2.768732 | 2.103472  |
| 14 | 1 | 0 | 3.181400  | -0.180058 | -1.887680 |
| 15 | 1 | 0 | 0.249552  | -0.374825 | 2.658663  |
| 16 | 7 | 0 | 2.118030  | 2.272234  | -0.251073 |
| 17 | 7 | 0 | 2.304392  | 3.159672  | -0.974767 |
| 18 | 6 | 0 | -0.825624 | 0.163130  | -1.474367 |
| 19 | 1 | 0 | -0.432203 | -0.648943 | -2.083107 |
| 20 | 6 | 0 | -0.026274 | 1.314990  | -1.350659 |
| 21 | 1 | 0 | -0.506596 | 2.224660  | -0.983272 |
| 22 | 1 | 0 | 0.640678  | 1.540916  | -2.191266 |
| 23 | 6 | 0 | -2.085610 | -0.100898 | -0.829469 |
| 24 | 6 | 0 | -2.741529 | -1.332113 | -1.083913 |
| 25 | 6 | 0 | -2.735701 | 0.810180  | 0.042172  |
| 26 | 6 | 0 | -3.972288 | -1.632382 | -0.513311 |
| 27 | 1 | 0 | -2.265345 | -2.049833 | -1.748411 |
| 28 | 6 | 0 | -3.965270 | 0.501972  | 0.611908  |
| 29 | 1 | 0 | -2.264250 | 1.756805  | 0.285642  |
| 30 | 6 | 0 | -4.596117 | -0.717317 | 0.340477  |
| 31 | 1 | 0 | -4.449270 | -2.584286 | -0.733673 |
| 32 | 1 | 0 | -4.437978 | 1.220189  | 1.277278  |
| 33 | 1 | 0 | -5.558382 | -0.950038 | 0.788039  |

---

**Re-cis-cyclopropane**

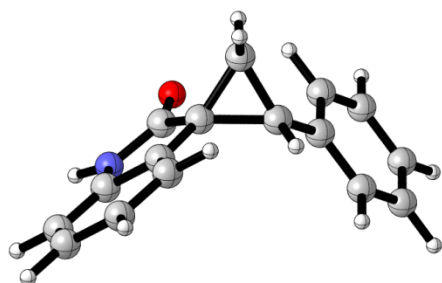

|                                              |                             |
|----------------------------------------------|-----------------------------|
| Zero-point correction=                       | 0.249703 (Hartree/Particle) |
| Thermal correction to Energy=                | 0.263425                    |
| Thermal correction to Enthalpy=              | 0.264370                    |
| Thermal correction to Gibbs Free Energy=     | 0.208362                    |
| Sum of electronic and zero-point Energies=   | -747.255170                 |
| Sum of electronic and thermal Energies=      | -747.241448                 |
| Sum of electronic and thermal Enthalpies=    | -747.240504                 |
| Sum of electronic and thermal Free Energies= | -747.296511                 |

---

| Center<br>Number | Atomic<br>Number | Atomic<br>Type | Coordinates (Angstroms) |   |  |
|------------------|------------------|----------------|-------------------------|---|--|
| Z                |                  |                | X                       | Y |  |

---

|    |   |   |           |           |           |
|----|---|---|-----------|-----------|-----------|
| 1  | 6 | 0 | -3.865294 | -1.577175 | 0.132529  |
| 2  | 6 | 0 | -4.380627 | -0.668229 | -0.793564 |
| 3  | 6 | 0 | -3.658247 | 0.472720  | -1.166957 |
| 4  | 6 | 0 | -2.412569 | 0.668853  | -0.583977 |
| 5  | 6 | 0 | -1.876283 | -0.240016 | 0.350217  |
| 6  | 6 | 0 | -2.604615 | -1.366117 | 0.708966  |
| 7  | 7 | 0 | -1.501412 | 1.714861  | -0.770050 |
| 8  | 6 | 0 | -0.376836 | 1.586586  | 0.035260  |
| 9  | 6 | 0 | -0.536407 | 0.262900  | 0.744644  |
| 10 | 8 | 0 | 0.515374  | 2.410321  | 0.140644  |
| 11 | 1 | 0 | -4.443976 | -2.453345 | 0.409983  |
| 12 | 1 | 0 | -5.358421 | -0.843207 | -1.233735 |
| 13 | 1 | 0 | -4.062293 | 1.179570  | -1.886284 |
| 14 | 1 | 0 | -2.209062 | -2.076605 | 1.431348  |
| 15 | 1 | 0 | -1.662873 | 2.542548  | -1.326281 |
| 16 | 6 | 0 | 0.671656  | -0.711558 | 0.931400  |
| 17 | 1 | 0 | 0.318256  | -1.740004 | 0.880841  |
| 18 | 6 | 0 | 0.134369  | 0.062461  | 2.086479  |
| 19 | 1 | 0 | 0.704509  | 0.914957  | 2.445808  |
| 20 | 1 | 0 | -0.429247 | -0.467640 | 2.850134  |
| 21 | 6 | 0 | 2.014228  | -0.544964 | 0.299637  |
| 22 | 6 | 0 | 2.446509  | -1.544326 | -0.587247 |
| 23 | 6 | 0 | 2.876516  | 0.529164  | 0.564551  |
| 24 | 6 | 0 | 3.699281  | -1.476986 | -1.194312 |
| 25 | 1 | 0 | 1.791561  | -2.386941 | -0.798798 |
| 26 | 6 | 0 | 4.129573  | 0.597333  | -0.044064 |
| 27 | 1 | 0 | 2.563501  | 1.326424  | 1.227479  |
| 28 | 6 | 0 | 4.547822  | -0.402540 | -0.923590 |
| 29 | 1 | 0 | 4.012236  | -2.264872 | -1.874533 |
| 30 | 1 | 0 | 4.781767  | 1.439376  | 0.172137  |
| 31 | 1 | 0 | 5.526468  | -0.345481 | -1.392720 |

---

## 14.2 Rh<sub>2</sub>(OAc)<sub>4</sub>-Model (Diazoindole+Styrene+ Rh<sub>2</sub>(OAc)<sub>4</sub>)

Rh<sub>2</sub>(OAc)<sub>4</sub>:

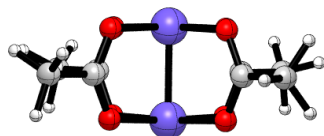

Zero-point correction=

0.211342 (Hartree/Particle)

Thermal correction to Energy=

0.232160

|                                              |              |
|----------------------------------------------|--------------|
| Thermal correction to Enthalpy=              | 0.233105     |
| Thermal correction to Gibbs Free Energy=     | 0.158468     |
| Sum of electronic and zero-point Energies=   | -1132.901655 |
| Sum of electronic and thermal Energies=      | -1132.880836 |
| Sum of electronic and thermal Enthalpies=    | -1132.879892 |
| Sum of electronic and thermal Free Energies= | -1132.954529 |

| Center<br>Number | Atomic<br>Number | Atomic<br>Type | Coordinates (Angstroms) |           |           |
|------------------|------------------|----------------|-------------------------|-----------|-----------|
|                  |                  |                | X                       | Y         | Z         |
| 1                | 45               | 0              | 0.000874                | -0.003333 | -1.191816 |
| 2                | 45               | 0              | 0.002379                | -0.001670 | 1.194897  |
| 3                | 8                | 0              | 1.483524                | -1.436657 | -1.133532 |
| 4                | 8                | 0              | 1.476389                | -1.444783 | 1.134464  |
| 5                | 8                | 0              | -1.434482               | -1.484363 | -1.128349 |
| 6                | 8                | 0              | -1.436094               | -1.479781 | 1.139650  |
| 7                | 8                | 0              | -1.483703               | 1.429415  | -1.131365 |
| 8                | 8                | 0              | -1.480329               | 1.433344  | 1.136628  |
| 9                | 8                | 0              | 1.438297                | 1.476657  | -1.135356 |
| 10               | 8                | 0              | 1.442126                | 1.476021  | 1.132776  |
| 11               | 6                | 0              | -1.900990               | 1.831998  | 0.003039  |
| 12               | 6                | 0              | 1.899639                | -1.840693 | 0.000739  |
| 13               | 6                | 0              | -1.838404               | -1.898722 | 0.006701  |
| 14               | 6                | 0              | 1.840211                | 1.895869  | -0.002032 |
| 15               | 6                | 0              | -2.895392               | -2.979448 | -0.001906 |
| 16               | 1                | 0              | -3.802636               | -2.593895 | -0.478948 |
| 17               | 1                | 0              | -2.546146               | -3.827038 | -0.599617 |
| 18               | 1                | 0              | -3.122871               | -3.304604 | 1.014167  |
| 19               | 6                | 0              | 3.011748                | -2.864449 | -0.006177 |
| 20               | 1                | 0              | 3.951963                | -2.366242 | -0.269141 |
| 21               | 1                | 0              | 3.115434                | -3.325565 | 0.977254  |
| 22               | 1                | 0              | 2.814873                | -3.623615 | -0.767749 |
| 23               | 6                | 0              | 2.858863                | 3.012700  | -0.001925 |
| 24               | 1                | 0              | 2.330942                | 3.972447  | 0.048014  |
| 25               | 1                | 0              | 3.505823                | 2.935113  | 0.874552  |
| 26               | 1                | 0              | 3.447700                | 2.991007  | -0.921043 |
| 27               | 6                | 0              | -2.993328               | 2.877123  | -0.007218 |
| 28               | 1                | 0              | -2.635601               | 3.770961  | -0.528619 |
| 29               | 1                | 0              | -3.855380               | 2.496756  | -0.564407 |
| 30               | 1                | 0              | -3.290420               | 3.134711  | 1.010232  |

**Catalyst-Diazooxindole-Complex:**  
**Complex coordination via C**

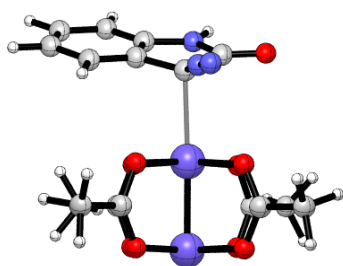

Zero-point correction= 0.332893 (Hartree/Particle)  
 Thermal correction to Energy= 0.365522  
 Thermal correction to Enthalpy= 0.366466  
 Thermal correction to Gibbs Free Energy= 0.265346  
 Sum of electronic and zero-point Energies= -1680.087099  
 Sum of electronic and thermal Energies= -1680.054471  
 Sum of electronic and thermal Enthalpies= -1680.053526  
 Sum of electronic and thermal Free Energies= -1680.154646

| Center<br>Number | Atomic<br>Number | Atomic<br>Type | Coordinates (Angstroms) |           |           |
|------------------|------------------|----------------|-------------------------|-----------|-----------|
| Z                |                  |                | X                       | Y         |           |
| 1                | 45               | 0              | -2.211781               | 0.850072  | -0.384767 |
| 2                | 45               | 0              | -0.121598               | -0.252205 | 0.114208  |
| 3                | 8                | 0              | -1.140805               | 2.298524  | -1.397580 |
| 4                | 8                | 0              | 0.823050                | 1.248412  | -0.963848 |
| 5                | 8                | 0              | -2.330264               | -0.276880 | -2.110528 |
| 6                | 8                | 0              | -0.368549               | -1.316837 | -1.643078 |
| 7                | 8                | 0              | -3.173935               | -0.659824 | 0.652343  |
| 8                | 8                | 0              | -1.208525               | -1.673353 | 1.153447  |
| 9                | 8                | 0              | -1.976618               | 1.910785  | 1.381128  |
| 10               | 8                | 0              | -0.008254               | 0.885967  | 1.849120  |
| 11               | 6                | 0              | -2.480261               | -1.579247 | 1.185825  |
| 12               | 6                | 0              | 0.122123                | 2.179010  | -1.477174 |
| 13               | 6                | 0              | -1.399511               | -1.106023 | -2.360141 |
| 14               | 6                | 0              | -0.949738               | 1.711662  | 2.097415  |
| 15               | 6                | 0              | -1.504565               | -1.904326 | -3.641290 |
| 16               | 1                | 0              | -2.531578               | -1.901163 | -4.010520 |
| 17               | 1                | 0              | -0.855331               | -1.449797 | -4.398819 |
| 18               | 1                | 0              | -1.157795               | -2.926901 | -3.472812 |
| 19               | 6                | 0              | 0.862070                | 3.225876  | -2.281781 |
| 20               | 1                | 0              | 0.370664                | 4.196216  | -2.179948 |
| 21               | 1                | 0              | 1.904725                | 3.284010  | -1.963540 |
| 22               | 1                | 0              | 0.835157                | 2.942946  | -3.340813 |
| 23               | 6                | 0              | -0.806178               | 2.547548  | 3.351086  |
| 24               | 1                | 0              | -0.367796               | 1.952150  | 4.155935  |

|    |   |   |           |           |           |
|----|---|---|-----------|-----------|-----------|
| 25 | 1 | 0 | -0.130354 | 3.385796  | 3.144182  |
| 26 | 1 | 0 | -1.775229 | 2.947174  | 3.654892  |
| 27 | 6 | 0 | -3.218157 | -2.681912 | 1.912159  |
| 28 | 1 | 0 | -4.260685 | -2.403832 | 2.074188  |
| 29 | 1 | 0 | -3.177343 | -3.595330 | 1.308023  |
| 30 | 1 | 0 | -2.725990 | -2.894761 | 2.865126  |
| 31 | 6 | 0 | 4.363484  | 1.723390  | 0.909226  |
| 32 | 6 | 0 | 5.040877  | 1.440288  | -0.280688 |
| 33 | 6 | 0 | 4.730206  | 0.305426  | -1.040404 |
| 34 | 6 | 0 | 3.730659  | -0.536445 | -0.569548 |
| 35 | 6 | 0 | 3.038999  | -0.253203 | 0.626543  |
| 36 | 6 | 0 | 3.345895  | 0.879670  | 1.370041  |
| 37 | 7 | 0 | 3.251659  | -1.732522 | -1.112023 |
| 38 | 6 | 0 | 2.283136  | -2.340744 | -0.327637 |
| 39 | 6 | 0 | 2.023449  | -1.314518 | 0.761461  |
| 40 | 8 | 0 | 1.794329  | -3.439934 | -0.479947 |
| 41 | 1 | 0 | 4.621865  | 2.610722  | 1.479450  |
| 42 | 1 | 0 | 5.824571  | 2.108805  | -0.625761 |
| 43 | 1 | 0 | 5.261474  | 0.085859  | -1.962004 |
| 44 | 1 | 0 | 2.791520  | 1.113748  | 2.273043  |
| 45 | 1 | 0 | 3.586578  | -2.171744 | -1.957393 |
| 46 | 7 | 0 | 1.614633  | -1.779874 | 1.941955  |
| 47 | 7 | 0 | 1.192174  | -2.170672 | 2.911913  |

---

### Complex coordination via N

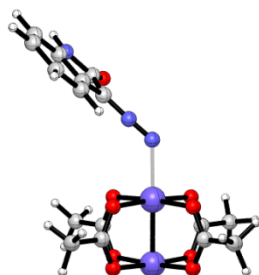

|                                              |                             |
|----------------------------------------------|-----------------------------|
| Zero-point correction=                       | 0.333472 (Hartree/Particle) |
| Thermal correction to Energy=                | 0.365011                    |
| Thermal correction to Enthalpy=              | 0.365955                    |
| Thermal correction to Gibbs Free Energy=     | 0.265496                    |
| Sum of electronic and zero-point Energies=   | -1680.091960                |
| Sum of electronic and thermal Energies=      | -1680.060421                |
| Sum of electronic and thermal Enthalpies=    | -1680.059477                |
| Sum of electronic and thermal Free Energies= | -1680.159936                |

---

| Center | Atomic | Atomic | Coordinates (Angstroms) |
|--------|--------|--------|-------------------------|
|--------|--------|--------|-------------------------|

| Number<br>Z | Number | Type | X         | Y         |           |
|-------------|--------|------|-----------|-----------|-----------|
| 1           | 45     | 0    | -2.786631 | -0.291084 | 0.726501  |
| 2           | 45     | 0    | -0.705766 | 0.097306  | -0.423266 |
| 3           | 8      | 0    | -1.849613 | -1.806216 | 1.779460  |
| 4           | 8      | 0    | 0.114592  | -1.443364 | 0.702840  |
| 5           | 8      | 0    | -2.182530 | 1.076029  | 2.152360  |
| 6           | 8      | 0    | -0.213874 | 1.431634  | 1.082394  |
| 7           | 8      | 0    | -3.614294 | 1.240513  | -0.381984 |
| 8           | 8      | 0    | -1.655138 | 1.612640  | -1.463609 |
| 9           | 8      | 0    | -3.285911 | -1.635856 | -0.762960 |
| 10          | 8      | 0    | -1.326389 | -1.273198 | -1.848018 |
| 11          | 6      | 0    | -2.884426 | 1.848815  | -1.226420 |
| 12          | 6      | 0    | -0.624751 | -2.046832 | 1.549534  |
| 13          | 6      | 0    | -1.048863 | 1.635263  | 2.024050  |
| 14          | 6      | 0    | -2.462136 | -1.834589 | -1.709575 |
| 15          | 6      | 0    | -0.650309 | 2.654989  | 3.067723  |
| 16          | 1      | 0    | 0.389607  | 2.496187  | 3.365781  |
| 17          | 1      | 0    | -0.718433 | 3.657409  | 2.630231  |
| 18          | 1      | 0    | -1.310477 | 2.594928  | 3.934370  |
| 19          | 6      | 0    | -3.536899 | 2.937102  | -2.049647 |
| 20          | 1      | 0    | -2.826068 | 3.745214  | -2.237263 |
| 21          | 1      | 0    | -3.835453 | 2.518255  | -3.017820 |
| 22          | 1      | 0    | -4.426784 | 3.315150  | -1.543049 |
| 23          | 6      | 0    | 0.030871  | -3.156816 | 2.342539  |
| 24          | 1      | 0    | 0.355935  | -3.948341 | 1.658955  |
| 25          | 1      | 0    | 0.922835  | -2.770504 | 2.845627  |
| 26          | 1      | 0    | -0.664394 | -3.567273 | 3.076059  |
| 27          | 6      | 0    | -2.847711 | -2.845963 | -2.767012 |
| 28          | 1      | 0    | -2.636225 | -2.443283 | -3.761383 |
| 29          | 1      | 0    | -2.238632 | -3.747930 | -2.638720 |
| 30          | 1      | 0    | -3.902752 | -3.109537 | -2.678274 |
| 31          | 6      | 0    | 5.721863  | -2.370373 | -0.183549 |
| 32          | 6      | 0    | 6.872404  | -1.666391 | 0.187264  |
| 33          | 6      | 0    | 6.877181  | -0.267572 | 0.264098  |
| 34          | 6      | 0    | 5.700629  | 0.403772  | -0.042655 |
| 35          | 6      | 0    | 4.533084  | -0.300847 | -0.419988 |
| 36          | 6      | 0    | 4.537904  | -1.691517 | -0.490409 |
| 37          | 7      | 0    | 5.434189  | 1.775482  | -0.049033 |
| 38          | 6      | 0    | 4.125740  | 2.073371  | -0.420766 |
| 39          | 6      | 0    | 3.527561  | 0.721014  | -0.663662 |
| 40          | 8      | 0    | 3.624803  | 3.175843  | -0.522653 |
| 41          | 1      | 0    | 5.745455  | -3.454647 | -0.233783 |

|    |   |   |          |           |           |
|----|---|---|----------|-----------|-----------|
| 42 | 1 | 0 | 7.782740 | -2.210549 | 0.421555  |
| 43 | 1 | 0 | 7.773629 | 0.273453  | 0.552647  |
| 44 | 1 | 0 | 3.641383 | -2.235507 | -0.773877 |
| 45 | 1 | 0 | 6.093883 | 2.505887  | 0.176326  |
| 46 | 7 | 0 | 2.310474 | 0.566171  | -1.069614 |
| 47 | 7 | 0 | 1.238996 | 0.446392  | -1.466320 |

-----

**Complex coordination via O**

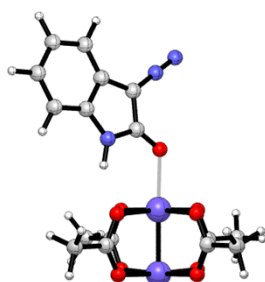

|                                              |                             |
|----------------------------------------------|-----------------------------|
| Zero-point correction=                       | 0.334178 (Hartree/Particle) |
| Thermal correction to Energy=                | 0.366373                    |
| Thermal correction to Enthalpy=              | 0.367317                    |
| Thermal correction to Gibbs Free Energy=     | 0.265953                    |
| Sum of electronic and zero-point Energies=   | -1680.106896                |
| Sum of electronic and thermal Energies=      | -1680.074701                |
| Sum of electronic and thermal Enthalpies=    | -1680.073757                |
| Sum of electronic and thermal Free Energies= | -1680.175121                |

-----

| Center Number | Atomic Number | Atomic Type | Coordinates (Angstroms) |           |           |
|---------------|---------------|-------------|-------------------------|-----------|-----------|
|               |               |             | X                       | Y         | Z         |
| 1             | 45            | 0           | 2.738019                | -0.672843 | -0.179097 |
| 2             | 45            | 0           | 0.567107                | 0.345747  | 0.097493  |
| 3             | 8             | 0           | 2.999366                | -0.511835 | 1.865372  |
| 4             | 8             | 0           | 0.945733                | 0.418507  | 2.132934  |
| 5             | 8             | 0           | 1.839924                | -2.527190 | 0.084086  |
| 6             | 8             | 0           | -0.210621               | -1.599319 | 0.316302  |
| 7             | 8             | 0           | 2.355583                | -0.773979 | -2.211456 |
| 8             | 8             | 0           | 0.317342                | 0.191980  | -1.954278 |
| 9             | 8             | 0           | 3.515247                | 1.220708  | -0.425364 |
| 10            | 8             | 0           | 1.475055                | 2.173813  | -0.141151 |
| 11            | 6             | 0           | 1.255074                | -0.315589 | -2.651815 |
| 12            | 6             | 0           | 2.062134                | -0.015248 | 2.566391  |
| 13            | 6             | 0           | 0.591396                | -2.596914 | 0.258236  |
| 14            | 6             | 0           | 2.731812                | 2.218807  | -0.341112 |
| 15            | 6             | 0           | -6.941880               | -0.750154 | -0.086358 |

|    |   |   |           |           |           |
|----|---|---|-----------|-----------|-----------|
| 16 | 6 | 0 | -6.230682 | -1.954765 | -0.058453 |
| 17 | 6 | 0 | -4.833948 | -1.970840 | 0.035956  |
| 18 | 6 | 0 | -4.172595 | -0.750713 | 0.100801  |
| 19 | 6 | 0 | -4.885069 | 0.472050  | 0.073298  |
| 20 | 6 | 0 | -6.274238 | 0.477345  | -0.020474 |
| 21 | 7 | 0 | -2.802833 | -0.488180 | 0.196334  |
| 22 | 6 | 0 | -2.538066 | 0.856694  | 0.229512  |
| 23 | 6 | 0 | -3.860452 | 1.501536  | 0.156157  |
| 24 | 8 | 0 | -1.429812 | 1.407639  | 0.305566  |
| 25 | 1 | 0 | -8.025034 | -0.765161 | -0.160697 |
| 26 | 1 | 0 | -6.768272 | -2.896956 | -0.111297 |
| 27 | 1 | 0 | -4.284084 | -2.907015 | 0.056679  |
| 28 | 1 | 0 | -6.829591 | 1.410757  | -0.043369 |
| 29 | 1 | 0 | -2.041422 | -1.169107 | 0.234518  |
| 30 | 7 | 0 | -4.007511 | 2.798850  | 0.156570  |
| 31 | 7 | 0 | -4.123171 | 3.930373  | 0.158637  |
| 32 | 6 | 0 | -0.025955 | -3.971248 | 0.404924  |
| 33 | 1 | 0 | -0.641745 | -4.007897 | 1.309125  |
| 34 | 1 | 0 | -0.679418 | -4.169777 | -0.452217 |
| 35 | 1 | 0 | 0.750426  | -4.735934 | 0.450985  |
| 36 | 6 | 0 | 1.046323  | -0.346108 | -4.150818 |
| 37 | 1 | 0 | -0.010162 | -0.495876 | -4.385016 |
| 38 | 1 | 0 | 1.351816  | 0.620165  | -4.569343 |
| 39 | 1 | 0 | 1.657502  | -1.128618 | -4.604693 |
| 40 | 6 | 0 | 2.284275  | 0.077749  | 4.061077  |
| 41 | 1 | 0 | 2.240762  | 1.127445  | 4.369548  |
| 42 | 1 | 0 | 1.480075  | -0.449663 | 4.583938  |
| 43 | 1 | 0 | 3.250310  | -0.349037 | 4.334439  |
| 44 | 6 | 0 | 3.352685  | 3.593376  | -0.458923 |
| 45 | 1 | 0 | 2.626373  | 4.306611  | -0.853911 |
| 46 | 1 | 0 | 3.657845  | 3.929929  | 0.539002  |
| 47 | 1 | 0 | 4.241125  | 3.553679  | -1.092751 |

-----

**Cata- Styrene Complex: coordination via phenyl ring**

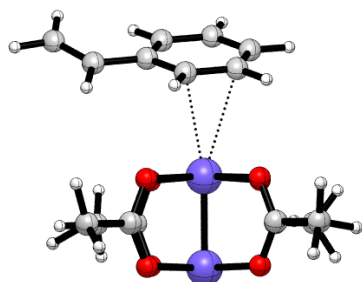

Zero-point correction=

0.346264 (Hartree/Particle)



|                                              |              |
|----------------------------------------------|--------------|
| Thermal correction to Energy=                | 0.376769     |
| Thermal correction to Enthalpy=              | 0.377714     |
| Thermal correction to Gibbs Free Energy=     | 0.278858     |
| Sum of electronic and zero-point Energies=   | -1442.419080 |
| Sum of electronic and thermal Energies=      | -1442.388575 |
| Sum of electronic and thermal Enthalpies=    | -1442.387631 |
| Sum of electronic and thermal Free Energies= | -1442.486486 |

---

| Center<br>Number | Atomic<br>Number | Atomic<br>Type | Coordinates (Angstroms) |           |           |
|------------------|------------------|----------------|-------------------------|-----------|-----------|
|                  |                  |                | X                       | Y         | Z         |
| 1                | 45               | 0              | 1.999189                | 0.491838  | 0.557051  |
| 2                | 45               | 0              | -0.143321               | -0.212383 | -0.277523 |
| 3                | 8                | 0              | 2.843717                | -0.212755 | -1.195417 |
| 4                | 8                | 0              | 0.825627                | -0.882090 | -1.984387 |
| 5                | 8                | 0              | 1.687319                | 2.329060  | -0.334464 |
| 6                | 8                | 0              | -0.331376               | 1.675090  | -1.132889 |
| 7                | 8                | 0              | 1.054190                | 1.160849  | 2.263819  |
| 8                | 8                | 0              | -0.969599               | 0.494623  | 1.483733  |
| 9                | 8                | 0              | 2.222045                | -1.369376 | 1.414055  |
| 10               | 8                | 0              | 0.202266                | -2.043229 | 0.629561  |
| 11               | 6                | 0              | -0.207749               | 1.021633  | 2.356298  |
| 12               | 6                | 0              | 2.089281                | -0.743636 | -2.070154 |
| 13               | 6                | 0              | 0.608851                | 2.520810  | -0.978889 |
| 14               | 6                | 0              | 1.285780                | -2.219830 | 1.273664  |
| 15               | 6                | 0              | 0.432480                | 3.882766  | -1.614285 |
| 16               | 1                | 0              | 0.429293                | 4.648899  | -0.831883 |
| 17               | 1                | 0              | 1.282723                | 4.090622  | -2.271346 |
| 18               | 1                | 0              | -0.498096               | 3.930455  | -2.181625 |
| 19               | 6                | 0              | 2.759318                | -1.287194 | -3.312945 |
| 20               | 1                | 0              | 3.185247                | -2.271240 | -3.084535 |
| 21               | 1                | 0              | 2.036434                | -1.397054 | -4.123347 |
| 22               | 1                | 0              | 3.578713                | -0.630279 | -3.614708 |
| 23               | 6                | 0              | 1.461444                | -3.556339 | 1.960676  |
| 24               | 1                | 0              | 0.991231                | -3.509843 | 2.950061  |
| 25               | 1                | 0              | 0.968430                | -4.344805 | 1.387685  |
| 26               | 1                | 0              | 2.521845                | -3.780258 | 2.092457  |
| 27               | 6                | 0              | -0.866619               | 1.560421  | 3.606852  |
| 28               | 1                | 0              | -0.185389               | 1.481289  | 4.456924  |
| 29               | 1                | 0              | -1.101076               | 2.620586  | 3.454853  |
| 30               | 1                | 0              | -1.798125               | 1.027063  | 3.806294  |
| 31               | 6                | 0              | -3.944556               | 1.447954  | -0.514571 |
| 32               | 1                | 0              | -3.216285               | 2.101843  | -0.992395 |

|    |   |   |           |           |           |
|----|---|---|-----------|-----------|-----------|
| 33 | 6 | 0 | -5.032727 | 1.994273  | 0.043162  |
| 34 | 1 | 0 | -5.812158 | 1.401393  | 0.515045  |
| 35 | 1 | 0 | -5.184727 | 3.069478  | 0.035228  |
| 36 | 6 | 0 | -3.607723 | 0.016248  | -0.571938 |
| 37 | 6 | 0 | -2.625219 | -0.414909 | -1.493172 |
| 38 | 6 | 0 | -4.210489 | -0.948705 | 0.246561  |
| 39 | 6 | 0 | -2.275875 | -1.768293 | -1.595950 |
| 40 | 1 | 0 | -2.188001 | 0.310179  | -2.173089 |
| 41 | 6 | 0 | -3.862620 | -2.297196 | 0.142610  |
| 42 | 1 | 0 | -4.948479 | -0.644137 | 0.983040  |
| 43 | 6 | 0 | -2.895993 | -2.714110 | -0.772256 |
| 44 | 1 | 0 | -1.528788 | -2.073839 | -2.321632 |
| 45 | 1 | 0 | -4.345563 | -3.024523 | 0.790167  |
| 46 | 1 | 0 | -2.620325 | -3.762056 | -0.842004 |

**Cata- Styrene Complex: coordination via double bond**

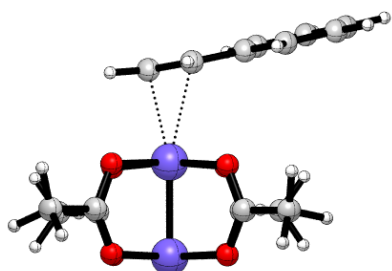

|                                              |                             |
|----------------------------------------------|-----------------------------|
| Zero-point correction=                       | 0.347570 (Hartree/Particle) |
| Thermal correction to Energy=                | 0.377183                    |
| Thermal correction to Enthalpy=              | 0.378127                    |
| Thermal correction to Gibbs Free Energy=     | 0.284225                    |
| Sum of electronic and zero-point Energies=   | -1442.427489                |
| Sum of electronic and thermal Energies=      | -1442.397876                |
| Sum of electronic and thermal Enthalpies=    | -1442.396931                |
| Sum of electronic and thermal Free Energies= | -1442.490834                |

| Center Number | Atomic Number | Atomic Type | Coordinates (Angstroms) |           |           |
|---------------|---------------|-------------|-------------------------|-----------|-----------|
|               |               |             | X                       | Y         | Z         |
| 1             | 45            | 0           | 1.831057                | -0.047633 | 1.087449  |
| 2             | 45            | 0           | 0.100239                | 0.019877  | -0.602733 |
| 3             | 8             | 0           | 0.913427                | -1.707502 | 1.900588  |
| 4             | 8             | 0           | -0.713207               | -1.663458 | 0.321008  |
| 5             | 8             | 0           | 2.917440                | -1.265834 | -0.187046 |

|    |   |   |           |           |           |
|----|---|---|-----------|-----------|-----------|
| 6  | 8 | 0 | 1.290041  | -1.217487 | -1.769547 |
| 7  | 8 | 0 | 2.691821  | 1.614697  | 0.215256  |
| 8  | 8 | 0 | 1.086002  | 1.685137  | -1.384374 |
| 9  | 8 | 0 | 0.641241  | 1.167781  | 2.264569  |
| 10 | 8 | 0 | -0.968495 | 1.257978  | 0.666786  |
| 11 | 6 | 0 | 2.142344  | 2.112788  | -0.814730 |
| 12 | 6 | 0 | -0.144493 | -2.146988 | 1.353208  |
| 13 | 6 | 0 | 2.424463  | -1.580817 | -1.314211 |
| 14 | 6 | 0 | -0.478762 | 1.553512  | 1.805847  |
| 15 | 6 | 0 | 3.272992  | -2.462654 | -2.205541 |
| 16 | 1 | 0 | 4.169631  | -1.910797 | -2.507984 |
| 17 | 1 | 0 | 3.603193  | -3.341755 | -1.644263 |
| 18 | 1 | 0 | 2.716642  | -2.768734 | -3.092749 |
| 19 | 6 | 0 | -0.805892 | -3.342377 | 2.005151  |
| 20 | 1 | 0 | -1.374158 | -3.000562 | 2.877964  |
| 21 | 1 | 0 | -1.489666 | -3.832669 | 1.310099  |
| 22 | 1 | 0 | -0.045307 | -4.044671 | 2.355298  |
| 23 | 6 | 0 | -1.303069 | 2.475447  | 2.678421  |
| 24 | 1 | 0 | -1.058179 | 3.514666  | 2.428569  |
| 25 | 1 | 0 | -2.367853 | 2.320384  | 2.491267  |
| 26 | 1 | 0 | -1.067029 | 2.310933  | 3.731718  |
| 27 | 6 | 0 | 2.782162  | 3.350490  | -1.406146 |
| 28 | 1 | 0 | 2.357237  | 4.236281  | -0.919473 |
| 29 | 1 | 0 | 3.858366  | 3.343755  | -1.221462 |
| 30 | 1 | 0 | 2.574868  | 3.414422  | -2.476719 |
| 31 | 6 | 0 | -2.082457 | -0.425147 | -2.027484 |
| 32 | 1 | 0 | -1.875928 | -1.478560 | -2.206537 |
| 33 | 6 | 0 | -1.251517 | 0.485089  | -2.605979 |
| 34 | 1 | 0 | -1.411855 | 1.555498  | -2.526980 |
| 35 | 1 | 0 | -0.470055 | 0.163426  | -3.285502 |
| 36 | 6 | 0 | -3.287461 | -0.161961 | -1.229948 |
| 37 | 6 | 0 | -4.017744 | -1.257420 | -0.737150 |
| 38 | 6 | 0 | -3.757870 | 1.134944  | -0.952314 |
| 39 | 6 | 0 | -5.182025 | -1.068743 | 0.005506  |
| 40 | 1 | 0 | -3.660729 | -2.263657 | -0.940070 |
| 41 | 6 | 0 | -4.919683 | 1.323897  | -0.210638 |
| 42 | 1 | 0 | -3.208483 | 1.998433  | -1.312659 |
| 43 | 6 | 0 | -5.637100 | 0.223780  | 0.271428  |
| 44 | 1 | 0 | -5.733054 | -1.928998 | 0.375869  |
| 45 | 1 | 0 | -5.270038 | 2.332432  | -0.007427 |
| 46 | 1 | 0 | -6.545430 | 0.375614  | 0.848424  |

-----  
**Transition state for loss of N2 (TS-9)**

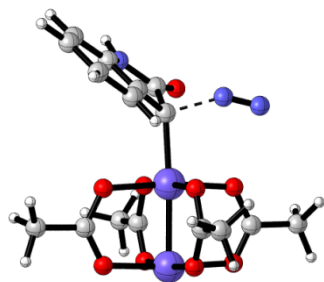

|                                              |                             |
|----------------------------------------------|-----------------------------|
| Zero-point correction=                       | 0.330112 (Hartree/Particle) |
| Thermal correction to Energy=                | 0.362817                    |
| Thermal correction to Enthalpy=              | 0.363761                    |
| Thermal correction to Gibbs Free Energy=     | 0.262882                    |
| Sum of electronic and zero-point Energies=   | -1680.064708                |
| Sum of electronic and thermal Energies=      | -1680.032003                |
| Sum of electronic and thermal Enthalpies=    | -1680.031058                |
| Sum of electronic and thermal Free Energies= | -1680.131938                |

---

| Center<br>Number | Atomic<br>Number | Atomic<br>Type | Coordinates (Angstroms) |           |           |
|------------------|------------------|----------------|-------------------------|-----------|-----------|
|                  |                  |                | X                       | Y         | Z         |
| 1                | 45               | 0              | 2.287797                | -0.747153 | -0.397487 |
| 2                | 45               | 0              | 0.090855                | 0.219948  | 0.107350  |
| 3                | 8                | 0              | 1.327397                | -2.154130 | -1.573703 |
| 4                | 8                | 0              | -0.711808               | -1.267548 | -1.111102 |
| 5                | 8                | 0              | 2.400193                | 0.536583  | -2.016740 |
| 6                | 8                | 0              | 0.349669                | 1.408233  | -1.571020 |
| 7                | 8                | 0              | 3.120219                | 0.718223  | 0.809337  |
| 8                | 8                | 0              | 1.085289                | 1.601415  | 1.282636  |
| 9                | 8                | 0              | 2.026930                | -1.961365 | 1.271181  |
| 10               | 8                | 0              | 0.004912                | -1.050610 | 1.760481  |
| 11               | 6                | 0              | 2.361050                | 1.560029  | 1.370179  |
| 12               | 6                | 0              | 0.066547                | -2.105698 | -1.678694 |
| 13               | 6                | 0              | 1.426864                | 1.314584  | -2.249063 |
| 14               | 6                | 0              | 0.978967                | -1.854933 | 1.969047  |
| 15               | 6                | 0              | 1.523888                | 2.217151  | -3.461326 |
| 16               | 1                | 0              | 1.168766                | 3.219598  | -3.208087 |
| 17               | 1                | 0              | 2.550844                | 2.254607  | -3.828462 |
| 18               | 1                | 0              | 0.874953                | 1.824221  | -4.252496 |
| 19               | 6                | 0              | -0.598911               | -3.123180 | -2.582529 |
| 20               | 1                | 0              | -0.884830               | -2.633835 | -3.520791 |
| 21               | 1                | 0              | 0.087151                | -3.942413 | -2.803958 |
| 22               | 1                | 0              | -1.511459               | -3.501680 | -2.114393 |
| 23               | 6                | 0              | 0.836517                | -2.778259 | 3.161905  |

|    |   |   |           |           |           |
|----|---|---|-----------|-----------|-----------|
| 24 | 1 | 0 | 0.445502  | -2.226988 | 4.021508  |
| 25 | 1 | 0 | 0.119551  | -3.571266 | 2.919121  |
| 26 | 1 | 0 | 1.797595  | -3.233079 | 3.406998  |
| 27 | 6 | 0 | 3.001370  | 2.638361  | 2.217409  |
| 28 | 1 | 0 | 2.506551  | 2.688976  | 3.191792  |
| 29 | 1 | 0 | 4.067141  | 2.442351  | 2.343681  |
| 30 | 1 | 0 | 2.863147  | 3.608568  | 1.727613  |
| 31 | 6 | 0 | -4.343913 | -1.892604 | 0.774037  |
| 32 | 6 | 0 | -5.283155 | -1.377604 | -0.128113 |
| 33 | 6 | 0 | -5.095512 | -0.142446 | -0.761991 |
| 34 | 6 | 0 | -3.948044 | 0.573478  | -0.445594 |
| 35 | 6 | 0 | -2.988715 | 0.068691  | 0.464433  |
| 36 | 6 | 0 | -3.178393 | -1.179152 | 1.060948  |
| 37 | 7 | 0 | -3.520488 | 1.812296  | -0.930356 |
| 38 | 6 | 0 | -2.335176 | 2.216556  | -0.324445 |
| 39 | 6 | 0 | -1.840026 | 0.975570  | 0.459945  |
| 40 | 8 | 0 | -1.823886 | 3.310138  | -0.409582 |
| 41 | 1 | 0 | -4.518136 | -2.857130 | 1.241031  |
| 42 | 1 | 0 | -6.178465 | -1.951275 | -0.352384 |
| 43 | 1 | 0 | -5.825279 | 0.238662  | -1.470155 |
| 44 | 1 | 0 | -2.421060 | -1.571559 | 1.730944  |
| 45 | 1 | 0 | -4.065312 | 2.438965  | -1.506303 |
| 46 | 7 | 0 | -1.677507 | 1.719140  | 2.088190  |
| 47 | 7 | 0 | -1.065930 | 1.998093  | 2.973839  |

-----

Carbenoid complex (10)

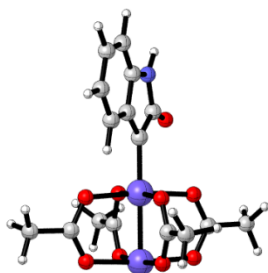

|                                              |                             |
|----------------------------------------------|-----------------------------|
| Zero-point correction=                       | 0.322674 (Hartree/Particle) |
| Thermal correction to Energy=                | 0.352417                    |
| Thermal correction to Enthalpy=              | 0.353361                    |
| Thermal correction to Gibbs Free Energy=     | 0.257548                    |
| Sum of electronic and zero-point Energies=   | -1570.580363                |
| Sum of electronic and thermal Energies=      | -1570.550621                |
| Sum of electronic and thermal Enthalpies=    | -1570.549676                |
| Sum of electronic and thermal Free Energies= | -1570.645489                |

-----

| Center | Atomic | Atomic | Coordinates (Angstroms) |
|--------|--------|--------|-------------------------|
|--------|--------|--------|-------------------------|

| Number<br>Z | Number | Type | X         | Y         |           |
|-------------|--------|------|-----------|-----------|-----------|
| 1           | 45     | 0    | -2.341864 | -0.529558 | 0.000424  |
| 2           | 45     | 0    | 0.018663  | 0.182000  | -0.000154 |
| 3           | 8      | 0    | -1.823616 | -1.908483 | 1.467967  |
| 4           | 8      | 0    | 0.357509  | -1.270850 | 1.451209  |
| 5           | 8      | 0    | -2.692091 | 0.900581  | 1.456286  |
| 6           | 8      | 0    | -0.510887 | 1.538860  | 1.471728  |
| 7           | 8      | 0    | -2.692934 | 0.900978  | -1.454874 |
| 8           | 8      | 0    | -0.511635 | 1.538904  | -1.471724 |
| 9           | 8      | 0    | -1.824438 | -1.908163 | -1.467710 |
| 10          | 8      | 0    | 0.356761  | -1.270764 | -1.451761 |
| 11          | 6      | 0    | -1.727165 | 1.611567  | -1.859760 |
| 12          | 6      | 0    | -0.626675 | -1.978854 | 1.864569  |
| 13          | 6      | 0    | -1.726201 | 1.611431  | 1.860441  |
| 14          | 6      | 0    | -0.627669 | -1.978613 | -1.864815 |
| 15          | 6      | 0    | -2.016631 | 2.670245  | 2.903527  |
| 16          | 1      | 0    | -1.872036 | 3.660958  | 2.459240  |
| 17          | 1      | 0    | -3.041488 | 2.576840  | 3.266004  |
| 18          | 1      | 0    | -1.310231 | 2.576789  | 3.733668  |
| 19          | 6      | 0    | -0.307175 | -2.975470 | 2.960305  |
| 20          | 1      | 0    | -0.255450 | -2.445263 | 3.918405  |
| 21          | 1      | 0    | -1.087831 | -3.735791 | 3.020367  |
| 22          | 1      | 0    | 0.667196  | -3.437888 | 2.782793  |
| 23          | 6      | 0    | -0.308490 | -2.975276 | -2.960603 |
| 24          | 1      | 0    | -0.250514 | -2.444189 | -3.917842 |
| 25          | 1      | 0    | 0.663224  | -3.442090 | -2.779857 |
| 26          | 1      | 0    | -1.092065 | -3.732255 | -3.024417 |
| 27          | 6      | 0    | -2.017587 | 2.669319  | -2.903937 |
| 28          | 1      | 0    | -1.320518 | 2.565021  | -3.740761 |
| 29          | 1      | 0    | -3.046700 | 2.584402  | -3.256245 |
| 30          | 1      | 0    | -1.858167 | 3.660330  | -2.465591 |
| 31          | 6      | 0    | 4.576695  | -1.918383 | -0.000201 |
| 32          | 6      | 0    | 5.676874  | -1.038155 | 0.000005  |
| 33          | 6      | 0    | 5.530421  | 0.353628  | 0.000030  |
| 34          | 6      | 0    | 4.235084  | 0.857577  | -0.000151 |
| 35          | 6      | 0    | 3.093709  | -0.015407 | -0.000332 |
| 36          | 6      | 0    | 3.283813  | -1.416782 | -0.000364 |
| 37          | 7      | 0    | 3.795705  | 2.163730  | -0.000184 |
| 38          | 6      | 0    | 2.386142  | 2.208383  | -0.000327 |
| 39          | 6      | 0    | 1.909121  | 0.750937  | -0.000404 |
| 40          | 8      | 0    | 1.735852  | 3.228423  | -0.000382 |
| 41          | 1      | 0    | 4.750717  | -2.989597 | -0.000226 |

|    |   |   |          |           |           |
|----|---|---|----------|-----------|-----------|
| 42 | 1 | 0 | 6.681720 | -1.452884 | 0.000144  |
| 43 | 1 | 0 | 6.398224 | 1.005980  | 0.000187  |
| 44 | 1 | 0 | 2.413609 | -2.061950 | -0.000514 |
| 45 | 1 | 0 | 4.372674 | 2.992841  | 0.000006  |

---

**End-on transition state leading to *trans* cyclopropane (TS-11a)**

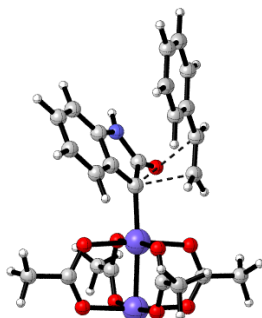

|                                              |                             |
|----------------------------------------------|-----------------------------|
| Zero-point correction=                       | 0.458701 (Hartree/Particle) |
| Thermal correction to Energy=                | 0.496428                    |
| Thermal correction to Enthalpy=              | 0.497372                    |
| Thermal correction to Gibbs Free Energy=     | 0.384651                    |
| Sum of electronic and zero-point Energies=   | -1880.086983                |
| Sum of electronic and thermal Energies=      | -1880.049256                |
| Sum of electronic and thermal Enthalpies=    | -1880.048312                |
| Sum of electronic and thermal Free Energies= | -1880.161032                |

---

| Center<br>Number | Atomic<br>Number | Atomic<br>Type | Coordinates (Angstroms) |           |           |
|------------------|------------------|----------------|-------------------------|-----------|-----------|
|                  |                  |                | X                       | Y         | Z         |
| 1                | 45               | 0              | -3.217948               | 0.056797  | 0.524467  |
| 2                | 45               | 0              | -0.838567               | -0.081734 | -0.120341 |
| 3                | 8                | 0              | -2.985818               | 2.111515  | 0.672082  |
| 4                | 8                | 0              | -0.801663               | 1.994356  | 0.056441  |
| 5                | 8                | 0              | -3.675690               | 0.253536  | -1.483283 |
| 6                | 8                | 0              | -1.485566               | 0.123305  | -2.081875 |
| 7                | 8                | 0              | -3.314607               | -2.004263 | 0.321590  |
| 8                | 8                | 0              | -1.114958               | -2.140625 | -0.224376 |
| 9                | 8                | 0              | -2.580381               | -0.152360 | 2.499581  |
| 10               | 8                | 0              | -0.386908               | -0.241579 | 1.911450  |
| 11               | 6                | 0              | -2.270798               | -2.640700 | -0.001414 |
| 12               | 6                | 0              | -1.862089               | 2.621699  | 0.395823  |
| 13               | 6                | 0              | -2.733298               | 0.232331  | -2.329489 |
| 14               | 6                | 0              | -1.348553               | -0.242769 | 2.759042  |
| 15               | 6                | 0              | -3.104036               | 0.330408  | -3.795349 |

|    |   |   |           |           |           |
|----|---|---|-----------|-----------|-----------|
| 16 | 1 | 0 | -4.166004 | 0.554446  | -3.907430 |
| 17 | 1 | 0 | -2.499608 | 1.102254  | -4.280911 |
| 18 | 1 | 0 | -2.875877 | -0.621855 | -4.286510 |
| 19 | 6 | 0 | -1.755083 | 4.133071  | 0.436924  |
| 20 | 1 | 0 | -0.753464 | 4.437945  | 0.748894  |
| 21 | 1 | 0 | -1.929450 | 4.526664  | -0.571547 |
| 22 | 1 | 0 | -2.511809 | 4.548159  | 1.105552  |
| 23 | 6 | 0 | -0.943629 | -0.376857 | 4.214105  |
| 24 | 1 | 0 | -0.472052 | -1.352692 | 4.373679  |
| 25 | 1 | 0 | -0.205092 | 0.390749  | 4.466366  |
| 26 | 1 | 0 | -1.815664 | -0.282750 | 4.862781  |
| 27 | 6 | 0 | -2.375924 | -4.145262 | -0.144223 |
| 28 | 1 | 0 | -1.676041 | -4.630192 | 0.544389  |
| 29 | 1 | 0 | -3.393065 | -4.478891 | 0.066383  |
| 30 | 1 | 0 | -2.090226 | -4.435335 | -1.160512 |
| 31 | 6 | 0 | 3.082172  | 2.864788  | 0.687186  |
| 32 | 6 | 0 | 3.928974  | 3.046107  | -0.418085 |
| 33 | 6 | 0 | 3.863737  | 2.221179  | -1.546658 |
| 34 | 6 | 0 | 2.922421  | 1.197691  | -1.538401 |
| 35 | 6 | 0 | 2.045307  | 0.996170  | -0.432917 |
| 36 | 6 | 0 | 2.134995  | 1.844301  | 0.683945  |
| 37 | 7 | 0 | 2.636543  | 0.254113  | -2.511500 |
| 38 | 6 | 0 | 1.553353  | -0.555265 | -2.128775 |
| 39 | 6 | 0 | 1.122516  | -0.064249 | -0.734059 |
| 40 | 8 | 0 | 1.092402  | -1.445814 | -2.808882 |
| 41 | 1 | 0 | 3.164781  | 3.530484  | 1.540974  |
| 42 | 1 | 0 | 4.656494  | 3.853612  | -0.402963 |
| 43 | 1 | 0 | 4.525121  | 2.379853  | -2.393278 |
| 44 | 1 | 0 | 1.458866  | 1.691242  | 1.517713  |
| 45 | 1 | 0 | 3.069082  | 0.187050  | -3.422047 |
| 46 | 6 | 0 | 3.115765  | -2.082405 | -0.127024 |
| 47 | 1 | 0 | 3.186665  | -2.682054 | -1.033532 |
| 48 | 6 | 0 | 1.872554  | -1.910940 | 0.416762  |
| 49 | 1 | 0 | 1.712228  | -1.407050 | 1.363607  |
| 50 | 1 | 0 | 1.029588  | -2.476593 | 0.037417  |
| 51 | 6 | 0 | 4.366394  | -1.504314 | 0.332960  |
| 52 | 6 | 0 | 5.536922  | -1.717439 | -0.427264 |
| 53 | 6 | 0 | 4.469320  | -0.732320 | 1.510996  |
| 54 | 6 | 0 | 6.757979  | -1.181138 | -0.032252 |
| 55 | 1 | 0 | 5.473550  | -2.313582 | -1.334463 |
| 56 | 6 | 0 | 5.690373  | -0.193687 | 1.902154  |
| 57 | 1 | 0 | 3.589944  | -0.563692 | 2.123123  |
| 58 | 6 | 0 | 6.838225  | -0.414254 | 1.134058  |
| 59 | 1 | 0 | 7.647520  | -1.359114 | -0.630188 |



|    |   |   |          |          |          |
|----|---|---|----------|----------|----------|
| 60 | 1 | 0 | 5.750947 | 0.398268 | 2.811149 |
| 61 | 1 | 0 | 7.790863 | 0.004993 | 1.446096 |

-----

**End-on transition state leading to *cis* cyclopropane (TS-11b)**

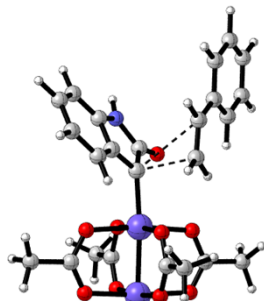

|                                              |                             |
|----------------------------------------------|-----------------------------|
| Zero-point correction=                       | 0.458626 (Hartree/Particle) |
| Thermal correction to Energy=                | 0.496376                    |
| Thermal correction to Enthalpy=              | 0.497321                    |
| Thermal correction to Gibbs Free Energy=     | 0.383990                    |
| Sum of electronic and zero-point Energies=   | -1880.086876                |
| Sum of electronic and thermal Energies=      | -1880.049126                |
| Sum of electronic and thermal Enthalpies=    | -1880.048182                |
| Sum of electronic and thermal Free Energies= | -1880.161512                |

-----

| Center Number | Atomic Number | Atomic Type | Coordinates (Angstroms) |           |           |
|---------------|---------------|-------------|-------------------------|-----------|-----------|
|               |               |             | X                       | Y         | Z         |
| 1             | 45            | 0           | 3.090547                | -0.766999 | -0.033105 |
| 2             | 45            | 0           | 0.743985                | 0.004542  | 0.000618  |
| 3             | 8             | 0           | 3.667800                | 1.192449  | 0.315269  |
| 4             | 8             | 0           | 1.512307                | 1.910684  | 0.344485  |
| 5             | 8             | 0           | 2.939405                | -1.086583 | 2.005844  |
| 6             | 8             | 0           | 0.785387                | -0.359763 | 2.044054  |
| 7             | 8             | 0           | 2.368901                | -2.683013 | -0.365581 |
| 8             | 8             | 0           | 0.210932                | -1.976688 | -0.360568 |
| 9             | 8             | 0           | 3.066017                | -0.390030 | -2.083507 |
| 10            | 8             | 0           | 0.912186                | 0.332803  | -2.049390 |
| 11            | 6             | 0           | 1.121672                | -2.870297 | -0.448270 |
| 12            | 6             | 0           | 2.775762                | 2.080965  | 0.433535  |
| 13            | 6             | 0           | 1.844991                | -0.822610 | 2.585672  |
| 14            | 6             | 0           | 2.023449                | 0.065973  | -2.629836 |
| 15            | 6             | 0           | 1.765133                | -1.064503 | 4.079412  |
| 16            | 1             | 0           | 1.636398                | -0.107011 | 4.595784  |
| 17            | 1             | 0           | 0.888947                | -1.679670 | 4.305202  |
| 18            | 1             | 0           | 2.673027                | -1.553162 | 4.436351  |

|    |   |   |           |           |           |
|----|---|---|-----------|-----------|-----------|
| 19 | 6 | 0 | 3.236124  | 3.491043  | 0.744798  |
| 20 | 1 | 0 | 3.266330  | 3.620484  | 1.833220  |
| 21 | 1 | 0 | 4.241668  | 3.655270  | 0.351924  |
| 22 | 1 | 0 | 2.535925  | 4.222555  | 0.335406  |
| 23 | 6 | 0 | 2.062398  | 0.315783  | -4.124526 |
| 24 | 1 | 0 | 1.397529  | -0.394539 | -4.628545 |
| 25 | 1 | 0 | 1.695547  | 1.322911  | -4.344777 |
| 26 | 1 | 0 | 3.077666  | 0.193707  | -4.504644 |
| 27 | 6 | 0 | 0.635379  | -4.289196 | -0.664407 |
| 28 | 1 | 0 | -0.034367 | -4.325652 | -1.529389 |
| 29 | 1 | 0 | 1.479932  | -4.962744 | -0.817079 |
| 30 | 1 | 0 | 0.061406  | -4.611669 | 0.211049  |
| 31 | 6 | 0 | -1.456655 | 4.412203  | -0.829871 |
| 32 | 6 | 0 | -2.466462 | 4.745545  | 0.086357  |
| 33 | 6 | 0 | -3.016638 | 3.799530  | 0.960244  |
| 34 | 6 | 0 | -2.529825 | 2.499722  | 0.884952  |
| 35 | 6 | 0 | -1.503684 | 2.136773  | -0.033822 |
| 36 | 6 | 0 | -0.964375 | 3.110012  | -0.888512 |
| 37 | 7 | 0 | -2.888883 | 1.378459  | 1.617630  |
| 38 | 6 | 0 | -2.131346 | 0.263578  | 1.237707  |
| 39 | 6 | 0 | -1.158783 | 0.749012  | 0.154497  |
| 40 | 8 | 0 | -2.259035 | -0.846517 | 1.712506  |
| 41 | 1 | 0 | -1.055348 | 5.177194  | -1.487562 |
| 42 | 1 | 0 | -2.832438 | 5.768324  | 0.125399  |
| 43 | 1 | 0 | -3.793420 | 4.077205  | 1.666704  |
| 44 | 1 | 0 | -0.177636 | 2.831275  | -1.580666 |
| 45 | 1 | 0 | -3.608795 | 1.330431  | 2.324711  |
| 46 | 6 | 0 | -3.465140 | -0.104906 | -1.493650 |
| 47 | 1 | 0 | -3.800030 | 0.832271  | -1.938827 |
| 48 | 6 | 0 | -2.136550 | -0.413279 | -1.594890 |
| 49 | 1 | 0 | -1.730629 | -1.354924 | -1.243477 |
| 50 | 1 | 0 | -1.489873 | 0.159791  | -2.249285 |
| 51 | 6 | 0 | -4.509539 | -0.878729 | -0.845138 |
| 52 | 6 | 0 | -5.837061 | -0.399135 | -0.895720 |
| 53 | 6 | 0 | -4.262698 | -2.098786 | -0.176181 |
| 54 | 6 | 0 | -6.879738 | -1.109844 | -0.311804 |
| 55 | 1 | 0 | -6.039588 | 0.538977  | -1.407495 |
| 56 | 6 | 0 | -5.308416 | -2.803428 | 0.411506  |
| 57 | 1 | 0 | -3.250605 | -2.479019 | -0.103531 |
| 58 | 6 | 0 | -6.617615 | -2.316865 | 0.344535  |
| 59 | 1 | 0 | -7.895188 | -0.727068 | -0.366296 |
| 60 | 1 | 0 | -5.101829 | -3.736664 | 0.927675  |
| 61 | 1 | 0 | -7.429868 | -2.875054 | 0.802215  |

Side -on transition state leading to *trans* cyclopropane (TS-11c)

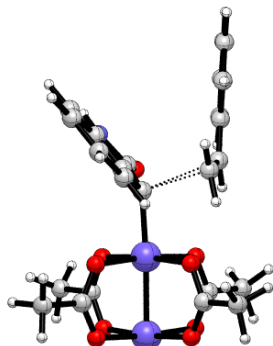

|                                              |                             |
|----------------------------------------------|-----------------------------|
| Zero-point correction=                       | 0.458654 (Hartree/Particle) |
| Thermal correction to Energy=                | 0.496436                    |
| Thermal correction to Enthalpy=              | 0.497380                    |
| Thermal correction to Gibbs Free Energy=     | 0.384069                    |
| Sum of electronic and zero-point Energies=   | -1880.083183                |
| Sum of electronic and thermal Energies=      | -1880.045402                |
| Sum of electronic and thermal Enthalpies=    | -1880.044457                |
| Sum of electronic and thermal Free Energies= | -1880.157768                |

---

| Center<br>Number | Atomic<br>Number | Atomic<br>Type | Coordinates (Angstroms) |           |           |
|------------------|------------------|----------------|-------------------------|-----------|-----------|
|                  |                  |                | X                       | Y         | Z         |
| 1                | 45               | 0              | 3.064829                | -0.759933 | -0.033235 |
| 2                | 45               | 0              | 0.715578                | 0.007902  | 0.008436  |
| 3                | 8                | 0              | 3.631572                | 1.207880  | 0.291430  |
| 4                | 8                | 0              | 1.473362                | 1.920403  | 0.323049  |
| 5                | 8                | 0              | 2.920556                | -1.055636 | 2.010348  |
| 6                | 8                | 0              | 0.768829                | -0.322445 | 2.054636  |
| 7                | 8                | 0              | 2.336165                | -2.680213 | -0.344398 |
| 8                | 8                | 0              | 0.175806                | -1.976926 | -0.339098 |
| 9                | 8                | 0              | 3.033895                | -0.409693 | -2.088939 |
| 10               | 8                | 0              | 0.874869                | 0.295372  | -2.055279 |
| 11               | 6                | 0              | 1.089165                | -2.868686 | -0.421869 |
| 12               | 6                | 0              | 2.736593                | 2.095010  | 0.402809  |
| 13               | 6                | 0              | 1.831608                | -0.779344 | 2.594626  |
| 14               | 6                | 0              | 1.985732                | 0.026756  | -2.637898 |
| 15               | 6                | 0              | 1.764509                | -0.995102 | 4.093193  |
| 16               | 1                | 0              | 0.872975                | -1.578465 | 4.341446  |
| 17               | 1                | 0              | 2.662440                | -1.504570 | 4.446381  |
| 18               | 1                | 0              | 1.673558                | -0.025408 | 4.594969  |
| 19               | 6                | 0              | 3.194132                | 3.510842  | 0.692405  |
| 20               | 1                | 0              | 3.211857                | 3.661547  | 1.778372  |

|    |   |   |           |           |           |
|----|---|---|-----------|-----------|-----------|
| 21 | 1 | 0 | 4.203609  | 3.668256  | 0.307002  |
| 22 | 1 | 0 | 2.497817  | 4.233783  | 0.261506  |
| 23 | 6 | 0 | 2.016309  | 0.257786  | -4.136005 |
| 24 | 1 | 0 | 1.297386  | -0.409246 | -4.624212 |
| 25 | 1 | 0 | 1.713750  | 1.285922  | -4.359001 |
| 26 | 1 | 0 | 3.015801  | 0.069294  | -4.530339 |
| 27 | 6 | 0 | 0.606251  | -4.291707 | -0.623782 |
| 28 | 1 | 0 | -0.080552 | -4.336173 | -1.474975 |
| 29 | 1 | 0 | 1.451153  | -4.961456 | -0.790581 |
| 30 | 1 | 0 | 0.053149  | -4.614916 | 0.264959  |
| 31 | 6 | 0 | -1.500107 | 4.363991  | -0.980981 |
| 32 | 6 | 0 | -2.404997 | 4.766678  | 0.012279  |
| 33 | 6 | 0 | -2.897353 | 3.870227  | 0.969542  |
| 34 | 6 | 0 | -2.465416 | 2.551395  | 0.895643  |
| 35 | 6 | 0 | -1.549411 | 2.119513  | -0.101826 |
| 36 | 6 | 0 | -1.059900 | 3.042051  | -1.036137 |
| 37 | 7 | 0 | -2.777197 | 1.472027  | 1.712357  |
| 38 | 6 | 0 | -2.119905 | 0.308574  | 1.299776  |
| 39 | 6 | 0 | -1.219603 | 0.723548  | 0.117959  |
| 40 | 8 | 0 | -2.255527 | -0.774297 | 1.832688  |
| 41 | 1 | 0 | -1.135510 | 5.089785  | -1.701618 |
| 42 | 1 | 0 | -2.730648 | 5.803028  | 0.048522  |
| 43 | 1 | 0 | -3.588545 | 4.199934  | 1.739846  |
| 44 | 1 | 0 | -0.350223 | 2.711249  | -1.787133 |
| 45 | 1 | 0 | -3.411555 | 1.482160  | 2.498488  |
| 46 | 6 | 0 | -2.804509 | -1.220325 | -1.071593 |
| 47 | 1 | 0 | -2.138805 | -2.028531 | -0.780025 |
| 48 | 6 | 0 | -2.216203 | -0.133192 | -1.668682 |
| 49 | 1 | 0 | -2.814827 | 0.716409  | -1.983423 |
| 50 | 1 | 0 | -1.233759 | -0.216690 | -2.118096 |
| 51 | 6 | 0 | -4.195399 | -1.358097 | -0.686852 |
| 52 | 6 | 0 | -4.549180 | -2.396200 | 0.201368  |
| 53 | 6 | 0 | -5.215116 | -0.505407 | -1.165747 |
| 54 | 6 | 0 | -5.870299 | -2.571881 | 0.602885  |
| 55 | 1 | 0 | -3.768590 | -3.045327 | 0.585968  |
| 56 | 6 | 0 | -6.533361 | -0.685614 | -0.765767 |
| 57 | 1 | 0 | -4.971205 | 0.285301  | -1.868839 |
| 58 | 6 | 0 | -6.865392 | -1.718517 | 0.120226  |
| 59 | 1 | 0 | -6.124862 | -3.371718 | 1.292348  |
| 60 | 1 | 0 | -7.309121 | -0.028015 | -1.148192 |
| 61 | 1 | 0 | -7.898374 | -1.858284 | 0.427178  |

-----  
**Side-on transition state leading to *trans* cyclopropane (TS-11d)**

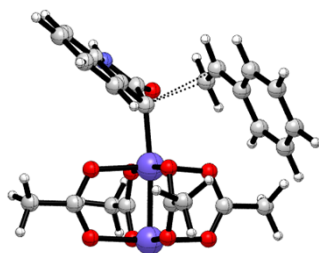

Zero-point correction= 0.458879 (Hartree/Particle)  
 Thermal correction to Energy= 0.495559  
 Thermal correction to Enthalpy= 0.496503  
 Thermal correction to Gibbs Free Energy= 0.388640  
 Sum of electronic and zero-point Energies= -1880.076673  
 Sum of electronic and thermal Energies= -1880.039994  
 Sum of electronic and thermal Enthalpies= -1880.039050  
 Sum of electronic and thermal Free Energies= -1880.146912

| Center<br>Number | Atomic<br>Number | Atomic<br>Type | Coordinates (Angstroms) |           |           |
|------------------|------------------|----------------|-------------------------|-----------|-----------|
|                  |                  |                | X                       | Y         | Z         |
| 1                | 45               | 0              | -2.254363               | -1.370994 | 0.747162  |
| 2                | 45               | 0              | -0.551477               | 0.144551  | -0.209189 |
| 3                | 8                | 0              | -2.671677               | 0.089786  | 2.153481  |
| 4                | 8                | 0              | -1.101473               | 1.484355  | 1.285414  |
| 5                | 8                | 0              | -3.632685               | -0.532731 | -0.552006 |
| 6                | 8                | 0              | -2.080550               | 0.901485  | -1.389915 |
| 7                | 8                | 0              | -1.752980               | -2.743624 | -0.729315 |
| 8                | 8                | 0              | -0.200773               | -1.353031 | -1.627589 |
| 9                | 8                | 0              | -0.759710               | -2.101930 | 1.995454  |
| 10               | 8                | 0              | 0.815502                | -0.721794 | 1.112560  |
| 11               | 6                | 0              | -0.894626               | -2.430317 | -1.599471 |
| 12               | 6                | 0              | -2.021382               | 1.174665  | 2.115847  |
| 13               | 6                | 0              | -3.255519               | 0.411673  | -1.308251 |
| 14               | 6                | 0              | 0.405562                | -1.616378 | 1.930413  |
| 15               | 6                | 0              | -4.301662               | 1.056594  | -2.194546 |
| 16               | 1                | 0              | -3.858868               | 1.345202  | -3.150644 |
| 17               | 1                | 0              | -5.142841               | 0.377223  | -2.345075 |
| 18               | 1                | 0              | -4.669765               | 1.965828  | -1.704457 |
| 19               | 6                | 0              | -2.370098               | 2.237644  | 3.138185  |
| 20               | 1                | 0              | -2.974967               | 3.013361  | 2.654422  |
| 21               | 1                | 0              | -2.942182               | 1.802920  | 3.959669  |
| 22               | 1                | 0              | -1.459235               | 2.712417  | 3.512303  |
| 23               | 6                | 0              | 1.430053                | -2.122273 | 2.926519  |

|    |   |   |           |           |           |
|----|---|---|-----------|-----------|-----------|
| 24 | 1 | 0 | 2.365790  | -2.360663 | 2.413755  |
| 25 | 1 | 0 | 1.641392  | -1.331869 | 3.656090  |
| 26 | 1 | 0 | 1.048837  | -2.999678 | 3.451539  |
| 27 | 6 | 0 | -0.663130 | -3.401426 | -2.739567 |
| 28 | 1 | 0 | 0.405414  | -3.505894 | -2.948859 |
| 29 | 1 | 0 | -1.101812 | -4.373005 | -2.506307 |
| 30 | 1 | 0 | -1.137192 | -3.003108 | -3.644022 |
| 31 | 6 | 0 | 2.592394  | 3.339324  | 1.927871  |
| 32 | 6 | 0 | 2.427832  | 4.644951  | 1.440822  |
| 33 | 6 | 0 | 1.768553  | 4.899291  | 0.233010  |
| 34 | 6 | 0 | 1.294045  | 3.805617  | -0.483086 |
| 35 | 6 | 0 | 1.458792  | 2.473874  | -0.017452 |
| 36 | 6 | 0 | 2.098139  | 2.251809  | 1.209311  |
| 37 | 7 | 0 | 0.599276  | 3.780963  | -1.687240 |
| 38 | 6 | 0 | 0.338892  | 2.469307  | -2.094879 |
| 39 | 6 | 0 | 0.788468  | 1.559065  | -0.928995 |
| 40 | 8 | 0 | -0.133417 | 2.166620  | -3.170528 |
| 41 | 1 | 0 | 3.100755  | 3.179719  | 2.874239  |
| 42 | 1 | 0 | 2.813293  | 5.482788  | 2.016048  |
| 43 | 1 | 0 | 1.633448  | 5.915166  | -0.127122 |
| 44 | 1 | 0 | 2.198015  | 1.236343  | 1.576455  |
| 45 | 1 | 0 | 0.427583  | 4.573681  | -2.289852 |
| 46 | 6 | 0 | 3.376962  | 0.208009  | -1.407116 |
| 47 | 1 | 0 | 4.089172  | 1.024191  | -1.283578 |
| 48 | 6 | 0 | 2.245108  | 0.474260  | -2.145185 |
| 49 | 1 | 0 | 1.539621  | -0.300889 | -2.419432 |
| 50 | 1 | 0 | 2.293066  | 1.329311  | -2.809139 |
| 51 | 6 | 0 | 3.763314  | -1.027559 | -0.765498 |
| 52 | 6 | 0 | 5.008318  | -1.084313 | -0.099550 |
| 53 | 6 | 0 | 2.973834  | -2.199271 | -0.818145 |
| 54 | 6 | 0 | 5.456088  | -2.265712 | 0.482851  |
| 55 | 1 | 0 | 5.624494  | -0.189535 | -0.053661 |
| 56 | 6 | 0 | 3.425228  | -3.376992 | -0.236151 |
| 57 | 1 | 0 | 2.001630  | -2.162438 | -1.295207 |
| 58 | 6 | 0 | 4.666831  | -3.417428 | 0.412764  |
| 59 | 1 | 0 | 6.418049  | -2.292737 | 0.986744  |
| 60 | 1 | 0 | 2.809443  | -4.270993 | -0.282522 |
| 61 | 1 | 0 | 5.014874  | -4.343678 | 0.861850  |

---

### 14.3 Rh<sub>2</sub>(S-PTTL)<sub>4</sub>-Model (Diazooxindole+Styrene+ Rh<sub>2</sub>(S-PTTL)<sub>4</sub>)

#### Rh<sub>2</sub>(S-PTTL)<sub>4</sub> (13)

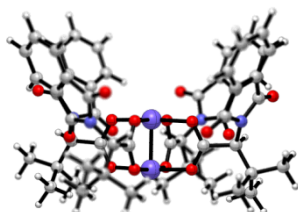

|                                              |                             |
|----------------------------------------------|-----------------------------|
| Zero-point correction=                       | 1.053671 (Hartree/Particle) |
| Thermal correction to Energy=                | 1.127920                    |
| Thermal correction to Enthalpy=              | 1.128865                    |
| Thermal correction to Gibbs Free Energy=     | 0.940747                    |
| Sum of electronic and zero-point Energies=   | -3808.583069                |
| Sum of electronic and thermal Energies=      | -3808.508819                |
| Sum of electronic and thermal Enthalpies=    | -3808.507875                |
| Sum of electronic and thermal Free Energies= | -3808.695993                |

| Center<br>Number<br>Z | Atomic<br>Number | Atomic<br>Type | Coordinates (Angstroms) |           |           |
|-----------------------|------------------|----------------|-------------------------|-----------|-----------|
|                       |                  |                | X                       | Y         | Z         |
| 1                     | 45               | 0              | -0.025471               | -0.132914 | 0.185449  |
| 2                     | 45               | 0              | -0.096019               | -0.195755 | -2.199157 |
| 3                     | 7                | 0              | 4.081812                | -2.416981 | 0.138223  |
| 4                     | 8                | 0              | 2.388484                | -3.975519 | -0.258601 |
| 5                     | 8                | 0              | 5.685928                | -1.131744 | 1.244380  |
| 6                     | 6                | 0              | 3.275025                | -3.530799 | 0.443360  |
| 7                     | 6                | 0              | 3.734704                | -4.012565 | 1.777861  |
| 8                     | 6                | 0              | 3.309504                | -5.096615 | 2.532221  |
| 9                     | 1                | 0              | 2.523182                | -5.752968 | 2.172702  |
| 10                    | 6                | 0              | 3.931569                | -5.301574 | 3.771249  |
| 11                    | 1                | 0              | 3.626309                | -6.139300 | 4.391825  |
| 12                    | 6                | 0              | 4.940443                | -4.441695 | 4.225754  |
| 13                    | 1                | 0              | 5.402662                | -4.626753 | 5.191328  |
| 14                    | 6                | 0              | 5.358874                | -3.347391 | 3.456752  |
| 15                    | 1                | 0              | 6.136515                | -2.672609 | 3.800909  |
| 16                    | 6                | 0              | 4.737827                | -3.154661 | 2.231052  |
| 17                    | 6                | 0              | 4.941759                | -2.094049 | 1.202824  |
| 18                    | 7                | 0              | 2.561292                | 3.727571  | -0.028057 |
| 19                    | 8                | 0              | 3.786174                | 1.854746  | -0.679754 |
| 20                    | 8                | 0              | 1.623993                | 5.395738  | 1.308834  |
| 21                    | 6                | 0              | 3.551293                | 2.739077  | 0.122824  |

|    |   |   |           |           |           |
|----|---|---|-----------|-----------|-----------|
| 22 | 6 | 0 | 4.202433  | 3.001412  | 1.435286  |
| 23 | 6 | 0 | 5.239864  | 2.328621  | 2.066287  |
| 24 | 1 | 0 | 5.701428  | 1.455740  | 1.614276  |
| 25 | 6 | 0 | 5.637360  | 2.807462  | 3.322643  |
| 26 | 1 | 0 | 6.444478  | 2.309498  | 3.852459  |
| 27 | 6 | 0 | 5.008151  | 3.912237  | 3.912116  |
| 28 | 1 | 0 | 5.340670  | 4.256712  | 4.887409  |
| 29 | 6 | 0 | 3.950570  | 4.571464  | 3.270390  |
| 30 | 1 | 0 | 3.446243  | 5.418395  | 3.725253  |
| 31 | 6 | 0 | 3.564263  | 4.093733  | 2.026508  |
| 32 | 6 | 0 | 2.463417  | 4.535376  | 1.122099  |
| 33 | 7 | 0 | -3.767517 | 2.590600  | 0.198293  |
| 34 | 8 | 0 | -1.852882 | 3.723426  | -0.504593 |
| 35 | 8 | 0 | -5.437503 | 1.726675  | 1.580903  |
| 36 | 6 | 0 | -2.714768 | 3.515838  | 0.329092  |
| 37 | 6 | 0 | -2.881037 | 4.145300  | 1.667725  |
| 38 | 6 | 0 | -2.119167 | 5.121716  | 2.294668  |
| 39 | 1 | 0 | -1.239310 | 5.541979  | 1.816224  |
| 40 | 6 | 0 | -2.518648 | 5.514293  | 3.579791  |
| 41 | 1 | 0 | -1.949274 | 6.274333  | 4.107183  |
| 42 | 6 | 0 | -3.635695 | 4.938872  | 4.200485  |
| 43 | 1 | 0 | -3.917700 | 5.265570  | 5.197515  |
| 44 | 6 | 0 | -4.386519 | 3.942243  | 3.561951  |
| 45 | 1 | 0 | -5.244214 | 3.479664  | 4.040359  |
| 46 | 6 | 0 | -3.985906 | 3.560671  | 2.289699  |
| 47 | 6 | 0 | -4.532558 | 2.514447  | 1.378121  |
| 48 | 7 | 0 | -2.941269 | -3.733964 | 0.267708  |
| 49 | 8 | 0 | -3.927325 | -1.760389 | -0.485296 |
| 50 | 8 | 0 | -2.263364 | -5.470989 | 1.670483  |
| 51 | 6 | 0 | -3.801507 | -2.626509 | 0.361132  |
| 52 | 6 | 0 | -4.487554 | -2.743188 | 1.677714  |
| 53 | 6 | 0 | -5.430281 | -1.913672 | 2.270139  |
| 54 | 1 | 0 | -5.771037 | -1.005621 | 1.781809  |
| 55 | 6 | 0 | -5.895926 | -2.282940 | 3.539810  |
| 56 | 1 | 0 | -6.632037 | -1.659828 | 4.039635  |
| 57 | 6 | 0 | -5.424321 | -3.437032 | 4.179746  |
| 58 | 1 | 0 | -5.806469 | -3.694025 | 5.163756  |
| 59 | 6 | 0 | -4.460596 | -4.256991 | 3.576964  |
| 60 | 1 | 0 | -4.076969 | -5.144877 | 4.069870  |
| 61 | 6 | 0 | -4.005640 | -3.885143 | 2.320220  |
| 62 | 6 | 0 | -2.969735 | -4.508396 | 1.447816  |
| 63 | 8 | 0 | 1.871920  | -0.918255 | 0.094200  |
| 64 | 8 | 0 | 1.822758  | -0.962952 | -2.166074 |
| 65 | 8 | 0 | 0.775932  | 1.749248  | 0.046840  |



|     |   |   |           |           |           |
|-----|---|---|-----------|-----------|-----------|
| 66  | 8 | 0 | 0.693535  | 1.714860  | -2.212922 |
| 67  | 8 | 0 | -1.904380 | 0.691474  | 0.154129  |
| 68  | 8 | 0 | -1.990460 | 0.623667  | -2.104853 |
| 69  | 8 | 0 | -0.866681 | -2.007227 | 0.208501  |
| 70  | 8 | 0 | -0.915641 | -2.091038 | -2.050831 |
| 71  | 6 | 0 | 2.396306  | -1.125269 | -1.045939 |
| 72  | 6 | 0 | 3.884831  | -1.523271 | -1.006083 |
| 73  | 1 | 0 | 4.386655  | -0.593968 | -0.707214 |
| 74  | 6 | 0 | 4.573932  | -1.995382 | -2.331168 |
| 75  | 6 | 0 | 6.027011  | -2.393563 | -1.991277 |
| 76  | 1 | 0 | 6.570488  | -2.619677 | -2.915665 |
| 77  | 1 | 0 | 6.067380  | -3.286422 | -1.358005 |
| 78  | 1 | 0 | 6.557929  | -1.586317 | -1.474099 |
| 79  | 6 | 0 | 3.869111  | -3.190309 | -3.000562 |
| 80  | 1 | 0 | 2.837619  | -2.948639 | -3.267639 |
| 81  | 1 | 0 | 3.851016  | -4.069493 | -2.350474 |
| 82  | 1 | 0 | 4.406868  | -3.460089 | -3.917886 |
| 83  | 6 | 0 | 4.626638  | -0.801176 | -3.310704 |
| 84  | 1 | 0 | 3.628763  | -0.498584 | -3.633263 |
| 85  | 1 | 0 | 5.204540  | -1.082181 | -4.199280 |
| 86  | 1 | 0 | 5.114889  | 0.067439  | -2.852779 |
| 87  | 6 | 0 | 0.961567  | 2.264218  | -1.101856 |
| 88  | 6 | 0 | 1.515935  | 3.702708  | -1.058322 |
| 89  | 1 | 0 | 0.694243  | 4.283556  | -0.621045 |
| 90  | 6 | 0 | 1.900143  | 4.407422  | -2.399486 |
| 91  | 6 | 0 | 2.965249  | 3.646561  | -3.211139 |
| 92  | 1 | 0 | 3.902057  | 3.543728  | -2.655698 |
| 93  | 1 | 0 | 3.181284  | 4.199684  | -4.133577 |
| 94  | 1 | 0 | 2.623850  | 2.645379  | -3.483703 |
| 95  | 6 | 0 | 2.440585  | 5.811972  | -2.052150 |
| 96  | 1 | 0 | 3.389704  | 5.758405  | -1.507972 |
| 97  | 1 | 0 | 1.730965  | 6.378972  | -1.438893 |
| 98  | 1 | 0 | 2.618932  | 6.375703  | -2.974946 |
| 99  | 6 | 0 | 0.619429  | 4.583112  | -3.245353 |
| 100 | 1 | 0 | -0.158762 | 5.113362  | -2.683510 |
| 101 | 1 | 0 | 0.210855  | 3.622485  | -3.564950 |
| 102 | 1 | 0 | 0.849393  | 5.173726  | -4.140086 |
| 103 | 6 | 0 | -2.463824 | 0.917637  | -0.966472 |
| 104 | 6 | 0 | -3.855888 | 1.571526  | -0.854678 |
| 105 | 1 | 0 | -4.480116 | 0.784723  | -0.414801 |
| 106 | 6 | 0 | -4.579184 | 2.039918  | -2.159757 |
| 107 | 6 | 0 | -4.890041 | 0.796558  | -3.022445 |
| 108 | 1 | 0 | -5.463001 | 0.052137  | -2.456822 |
| 109 | 1 | 0 | -3.978274 | 0.317670  | -3.384140 |

|     |   |   |           |           |           |
|-----|---|---|-----------|-----------|-----------|
| 110 | 1 | 0 | -5.490111 | 1.094661  | -3.890224 |
| 111 | 6 | 0 | -5.921321 | 2.683161  | -1.746414 |
| 112 | 1 | 0 | -6.518449 | 2.009103  | -1.121634 |
| 113 | 1 | 0 | -6.505309 | 2.922406  | -2.642386 |
| 114 | 1 | 0 | -5.771162 | 3.615156  | -1.190750 |
| 115 | 6 | 0 | -3.767970 | 3.058320  | -2.982729 |
| 116 | 1 | 0 | -2.813247 | 2.640606  | -3.310156 |
| 117 | 1 | 0 | -3.559634 | 3.968192  | -2.412612 |
| 118 | 1 | 0 | -4.342199 | 3.343617  | -3.872878 |
| 119 | 6 | 0 | -1.174915 | -2.552165 | -0.898759 |
| 120 | 6 | 0 | -1.900462 | -3.908980 | -0.753413 |
| 121 | 1 | 0 | -1.167366 | -4.565174 | -0.267444 |
| 122 | 6 | 0 | -2.372573 | -4.647728 | -2.047980 |
| 123 | 6 | 0 | -1.125614 | -5.020143 | -2.880300 |
| 124 | 1 | 0 | -0.605246 | -4.134257 | -3.250094 |
| 125 | 1 | 0 | -1.427524 | -5.624624 | -3.743454 |
| 126 | 1 | 0 | -0.415926 | -5.614304 | -2.291045 |
| 127 | 6 | 0 | -3.069472 | -5.957210 | -1.617066 |
| 128 | 1 | 0 | -4.005033 | -5.761865 | -1.081742 |
| 129 | 1 | 0 | -2.429389 | -6.564445 | -0.967370 |
| 130 | 1 | 0 | -3.315185 | -6.550627 | -2.505048 |
| 131 | 6 | 0 | -3.350353 | -3.821393 | -2.904552 |
| 132 | 1 | 0 | -2.893315 | -2.893868 | -3.255243 |
| 133 | 1 | 0 | -4.255783 | -3.561888 | -2.348053 |
| 134 | 1 | 0 | -3.651908 | -4.410841 | -3.779180 |

---

### Cata-diazo-complex (14)

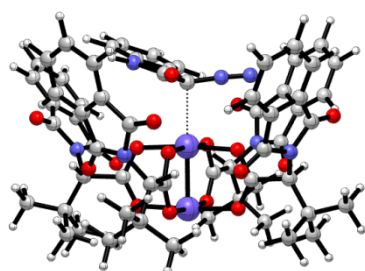

|                                              |                             |
|----------------------------------------------|-----------------------------|
| Zero-point correction=                       | 1.175170 (Hartree/Particle) |
| Thermal correction to Energy=                | 1.260267                    |
| Thermal correction to Enthalpy=              | 1.261212                    |
| Thermal correction to Gibbs Free Energy=     | 1.050698                    |
| Sum of electronic and zero-point Energies=   | -4355.769833                |
| Sum of electronic and thermal Energies=      | -4355.684736                |
| Sum of electronic and thermal Enthalpies=    | -4355.683791                |
| Sum of electronic and thermal Free Energies= | -4355.894305                |

---

| Center<br>Number<br>Z | Atomic<br>Number | Atomic<br>Type | Coordinates (Angstroms) |           |           |
|-----------------------|------------------|----------------|-------------------------|-----------|-----------|
|                       |                  |                | X                       | Y         | Z         |
| 1                     | 45               | 0              | 0.122009                | 0.092742  | -0.104315 |
| 2                     | 45               | 0              | 0.252987                | 0.131664  | -2.518356 |
| 3                     | 7                | 0              | -0.838165               | -4.448616 | -0.245410 |
| 4                     | 8                | 0              | -2.683318               | -3.209177 | -0.949698 |
| 5                     | 8                | 0              | 0.647109                | -5.609249 | 1.132782  |
| 6                     | 6                | 0              | -2.121034               | -3.895243 | -0.116093 |
| 7                     | 6                | 0              | -2.619048               | -4.304087 | 1.226645  |
| 8                     | 6                | 0              | -3.825211               | -4.017252 | 1.854220  |
| 9                     | 1                | 0              | -4.584610               | -3.415405 | 1.362289  |
| 10                    | 6                | 0              | -4.001580               | -4.517715 | 3.153017  |
| 11                    | 1                | 0              | -4.931141               | -4.322284 | 3.680777  |
| 12                    | 6                | 0              | -2.999407               | -5.272438 | 3.781785  |
| 13                    | 1                | 0              | -3.168276               | -5.646533 | 4.787775  |
| 14                    | 6                | 0              | -1.784121               | -5.543002 | 3.138522  |
| 15                    | 1                | 0              | -0.995452               | -6.109055 | 3.623741  |
| 16                    | 6                | 0              | -1.617023               | -5.042181 | 1.855716  |
| 17                    | 6                | 0              | -0.440399               | -5.104787 | 0.938009  |
| 18                    | 7                | 0              | 4.602687                | -1.136984 | 0.030603  |
| 19                    | 8                | 0              | 3.229414                | -2.882497 | -0.681029 |
| 20                    | 8                | 0              | 5.845577                | 0.272597  | 1.414238  |
| 21                    | 6                | 0              | 3.939170                | -2.372319 | 0.164929  |
| 22                    | 6                | 0              | 4.283478                | -2.881385 | 1.520535  |
| 23                    | 6                | 0              | 3.886910                | -4.046382 | 2.162429  |
| 24                    | 1                | 0              | 3.208857                | -4.748413 | 1.686513  |
| 25                    | 6                | 0              | 4.370501                | -4.252894 | 3.461887  |
| 26                    | 1                | 0              | 4.081298                | -5.149763 | 4.002173  |
| 27                    | 6                | 0              | 5.211783                | -3.319071 | 4.081633  |
| 28                    | 1                | 0              | 5.568041                | -3.510543 | 5.090064  |
| 29                    | 6                | 0              | 5.588765                | -2.137549 | 3.428443  |
| 30                    | 1                | 0              | 6.225565                | -1.399447 | 3.906176  |
| 31                    | 6                | 0              | 5.107591                | -1.940795 | 2.142082  |
| 32                    | 6                | 0              | 5.273932                | -0.783958 | 1.215755  |
| 33                    | 7                | 0              | 1.644290                | 4.479978  | -0.082438 |
| 34                    | 8                | 0              | 3.280735                | 2.977659  | -0.792661 |
| 35                    | 8                | 0              | 0.346011                | 5.830463  | 1.309184  |
| 36                    | 6                | 0              | 2.836430                | 3.743037  | 0.041868  |
| 37                    | 6                | 0              | 3.399982                | 4.084325  | 1.378275  |
| 38                    | 6                | 0              | 4.551944                | 3.628816  | 2.006123  |
| 39                    | 1                | 0              | 5.202601                | 2.897927  | 1.535547  |
| 40                    | 6                | 0              | 4.816809                | 4.126292  | 3.290039  |

|    |   |   |           |           |           |
|----|---|---|-----------|-----------|-----------|
| 41 | 1 | 0 | 5.705852  | 3.792431  | 3.817251  |
| 42 | 6 | 0 | 3.952380  | 5.039183  | 3.909290  |
| 43 | 1 | 0 | 4.188263  | 5.404824  | 4.904778  |
| 44 | 6 | 0 | 2.783452  | 5.476685  | 3.271364  |
| 45 | 1 | 0 | 2.097824  | 6.170309  | 3.748225  |
| 46 | 6 | 0 | 2.528993  | 4.980562  | 2.000701  |
| 47 | 6 | 0 | 1.363155  | 5.198786  | 1.096858  |
| 48 | 7 | 0 | -4.644209 | 0.728637  | -0.565020 |
| 49 | 8 | 0 | -3.705356 | 2.776461  | -1.178467 |
| 50 | 8 | 0 | -5.767428 | -0.900920 | 0.676631  |
| 51 | 6 | 0 | -4.470385 | 2.123287  | -0.497947 |
| 52 | 6 | 0 | -5.407570 | 2.598258  | 0.563086  |
| 53 | 6 | 0 | -5.688234 | 3.884819  | 0.998936  |
| 54 | 1 | 0 | -5.187205 | 4.743120  | 0.562271  |
| 55 | 6 | 0 | -6.641616 | 4.026720  | 2.016767  |
| 56 | 1 | 0 | -6.894193 | 5.018712  | 2.380758  |
| 57 | 6 | 0 | -7.279739 | 2.908437  | 2.571230  |
| 58 | 1 | 0 | -8.018841 | 3.051000  | 3.354726  |
| 59 | 6 | 0 | -6.982466 | 1.612553  | 2.126642  |
| 60 | 1 | 0 | -7.472030 | 0.739447  | 2.547279  |
| 61 | 6 | 0 | -6.039804 | 1.485133  | 1.116473  |
| 62 | 6 | 0 | -5.513911 | 0.265383  | 0.435352  |
| 63 | 8 | 0 | 0.043772  | -1.953704 | -0.240541 |
| 64 | 8 | 0 | 0.202140  | -1.943982 | -2.496808 |
| 65 | 8 | 0 | 2.187516  | -0.003581 | -0.099159 |
| 66 | 8 | 0 | 2.312624  | 0.038473  | -2.356357 |
| 67 | 8 | 0 | 0.265619  | 2.159583  | -0.128473 |
| 68 | 8 | 0 | 0.350454  | 2.204087  | -2.389982 |
| 69 | 8 | 0 | -1.948912 | 0.143617  | -0.293328 |
| 70 | 8 | 0 | -1.812227 | 0.145480  | -2.552864 |
| 71 | 6 | 0 | 0.107994  | -2.523237 | -1.375148 |
| 72 | 6 | 0 | 0.125920  | -4.065646 | -1.286632 |
| 73 | 1 | 0 | 1.102299  | -4.285666 | -0.838113 |
| 74 | 6 | 0 | 0.038618  | -4.901255 | -2.603800 |
| 75 | 6 | 0 | 0.044900  | -6.395971 | -2.214678 |
| 76 | 1 | 0 | 0.095014  | -7.011665 | -3.120080 |
| 77 | 1 | 0 | -0.864010 | -6.678063 | -1.672066 |
| 78 | 1 | 0 | 0.905816  | -6.646398 | -1.584464 |
| 79 | 6 | 0 | -1.221035 | -4.603819 | -3.437813 |
| 80 | 1 | 0 | -1.266296 | -3.553291 | -3.733810 |
| 81 | 1 | 0 | -2.136776 | -4.839028 | -2.887574 |
| 82 | 1 | 0 | -1.208576 | -5.217604 | -4.347124 |
| 83 | 6 | 0 | 1.303401  | -4.619632 | -3.445291 |
| 84 | 1 | 0 | 1.331632  | -3.585945 | -3.795021 |

|     |   |   |           |           |           |
|-----|---|---|-----------|-----------|-----------|
| 85  | 1 | 0 | 1.316753  | -5.280322 | -4.320374 |
| 86  | 1 | 0 | 2.215917  | -4.808147 | -2.867178 |
| 87  | 6 | 0 | 2.822634  | -0.046706 | -1.203873 |
| 88  | 6 | 0 | 4.352831  | -0.168194 | -1.043563 |
| 89  | 1 | 0 | 4.649217  | 0.794134  | -0.610607 |
| 90  | 6 | 0 | 5.229229  | -0.370319 | -2.323204 |
| 91  | 6 | 0 | 4.852521  | -1.622579 | -3.137227 |
| 92  | 1 | 0 | 4.971636  | -2.538866 | -2.551808 |
| 93  | 1 | 0 | 5.509858  | -1.695529 | -4.012556 |
| 94  | 1 | 0 | 3.818768  | -1.578604 | -3.487117 |
| 95  | 6 | 0 | 6.701101  | -0.490665 | -1.870111 |
| 96  | 1 | 0 | 6.875051  | -1.403658 | -1.290390 |
| 97  | 1 | 0 | 7.007380  | 0.363492  | -1.255472 |
| 98  | 1 | 0 | 7.354021  | -0.528137 | -2.749586 |
| 99  | 6 | 0 | 5.104268  | 0.888934  | -3.209710 |
| 100 | 1 | 0 | 5.359512  | 1.796861  | -2.650420 |
| 101 | 1 | 0 | 4.092977  | 1.007111  | -3.602959 |
| 102 | 1 | 0 | 5.796602  | 0.808975  | -4.056220 |
| 103 | 6 | 0 | 0.405971  | 2.746383  | -1.249847 |
| 104 | 6 | 0 | 0.629414  | 4.272793  | -1.126342 |
| 105 | 1 | 0 | -0.291194 | 4.652464  | -0.666311 |
| 106 | 6 | 0 | 0.849536  | 5.108785  | -2.427818 |
| 107 | 6 | 0 | -0.432972 | 5.018804  | -3.284241 |
| 108 | 1 | 0 | -1.314155 | 5.347347  | -2.718761 |
| 109 | 1 | 0 | -0.613611 | 4.001568  | -3.637282 |
| 110 | 1 | 0 | -0.336381 | 5.673602  | -4.158173 |
| 111 | 6 | 0 | 1.047945  | 6.583576  | -2.013698 |
| 112 | 1 | 0 | 0.222127  | 6.946119  | -1.390894 |
| 113 | 1 | 0 | 1.099607  | 7.212655  | -2.909611 |
| 114 | 1 | 0 | 1.979875  | 6.726711  | -1.455930 |
| 115 | 6 | 0 | 2.066446  | 4.654980  | -3.256493 |
| 116 | 1 | 0 | 1.964216  | 3.619527  | -3.587427 |
| 117 | 1 | 0 | 2.997976  | 4.738156  | -2.688820 |
| 118 | 1 | 0 | 2.156706  | 5.294470  | -4.143202 |
| 119 | 6 | 0 | -2.451197 | 0.089426  | -1.461191 |
| 120 | 6 | 0 | -3.972564 | -0.168721 | -1.508681 |
| 121 | 1 | 0 | -4.072039 | -1.161429 | -1.053618 |
| 122 | 6 | 0 | -4.671993 | -0.248343 | -2.911885 |
| 123 | 6 | 0 | -4.097246 | -1.455609 | -3.686584 |
| 124 | 1 | 0 | -3.046387 | -1.308763 | -3.940677 |
| 125 | 1 | 0 | -4.660567 | -1.590544 | -4.617767 |
| 126 | 1 | 0 | -4.180315 | -2.379294 | -3.103382 |
| 127 | 6 | 0 | -6.176754 | -0.514998 | -2.681860 |
| 128 | 1 | 0 | -6.677830 | 0.336502  | -2.207898 |

|     |   |   |           |           |           |
|-----|---|---|-----------|-----------|-----------|
| 129 | 1 | 0 | -6.342370 | -1.398983 | -2.056037 |
| 130 | 1 | 0 | -6.667340 | -0.685759 | -3.646756 |
| 131 | 6 | 0 | -4.518833 | 1.032566  | -3.754913 |
| 132 | 1 | 0 | -3.468715 | 1.264661  | -3.942949 |
| 133 | 1 | 0 | -4.975461 | 1.900126  | -3.269314 |
| 134 | 1 | 0 | -5.020088 | 0.890314  | -4.720499 |
| 135 | 6 | 0 | -2.377799 | 2.950757  | 3.226775  |
| 136 | 6 | 0 | -3.456280 | 2.137591  | 3.586098  |
| 137 | 6 | 0 | -3.360847 | 0.740957  | 3.539812  |
| 138 | 6 | 0 | -2.152832 | 0.187549  | 3.135653  |
| 139 | 6 | 0 | -1.061590 | 1.002192  | 2.769573  |
| 140 | 6 | 0 | -1.168075 | 2.387140  | 2.805198  |
| 141 | 7 | 0 | -1.779942 | -1.157607 | 3.056743  |
| 142 | 6 | 0 | -0.450473 | -1.333528 | 2.717316  |
| 143 | 6 | 0 | 0.016964  | 0.073666  | 2.373649  |
| 144 | 8 | 0 | 0.184003  | -2.368941 | 2.726083  |
| 145 | 1 | 0 | -2.477021 | 4.031297  | 3.259382  |
| 146 | 1 | 0 | -4.391689 | 2.591901  | 3.898187  |
| 147 | 1 | 0 | -4.200740 | 0.111495  | 3.818209  |
| 148 | 1 | 0 | -0.343083 | 3.019343  | 2.496874  |
| 149 | 1 | 0 | -2.384183 | -1.948229 | 3.237856  |
| 150 | 7 | 0 | 1.301945  | 0.340209  | 2.621755  |
| 151 | 7 | 0 | 2.404118  | 0.534522  | 2.759040  |

---

**Transition state for loss of N2 (TS15)**

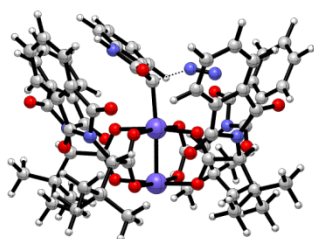

|                                              |                             |
|----------------------------------------------|-----------------------------|
| Zero-point correction=                       | 1.172048 (Hartree/Particle) |
| Thermal correction to Energy=                | 1.257410                    |
| Thermal correction to Enthalpy=              | 1.258354                    |
| Thermal correction to Gibbs Free Energy=     | 1.046865                    |
| Sum of electronic and zero-point Energies=   | -4355.747749                |
| Sum of electronic and thermal Energies=      | -4355.662387                |
| Sum of electronic and thermal Enthalpies=    | -4355.661442                |
| Sum of electronic and thermal Free Energies= | -4355.872931                |

---

| Center | Atomic | Atomic | Coordinates (Angstroms) |
|--------|--------|--------|-------------------------|
|--------|--------|--------|-------------------------|

| Number<br>Z | Number | Type | X         | Y         |            |
|-------------|--------|------|-----------|-----------|------------|
| 1           | 45     | 0    | 0.113195  | 0.104713  | -0.101151  |
| 2           | 45     | 0    | 0.288341  | 0.151815  | -2.550311  |
| 3           | 7      | 0    | -1.092149 | -4.374332 | -0.308063  |
| 4           | 8      | 0    | -2.870254 | -3.048720 | -1.1030044 |
| 5           | 8      | 0    | 0.323739  | -5.604311 | 1.083535   |
| 6           | 6      | 0    | -2.345044 | -3.751888 | -0.187222  |
| 7           | 6      | 0    | -2.863454 | -4.114326 | 1.161657   |
| 8           | 6      | 0    | -4.050460 | -3.752559 | 1.785272   |
| 9           | 1      | 0    | -4.774605 | -3.114540 | 1.286416   |
| 10          | 6      | 0    | -4.250330 | -4.220681 | 3.092121   |
| 11          | 1      | 0    | -5.166928 | -3.965966 | 3.617366   |
| 12          | 6      | 0    | -3.288171 | -5.015543 | 3.734121   |
| 13          | 1      | 0    | -3.475780 | -5.365486 | 4.745733   |
| 14          | 6      | 0    | -2.090405 | -5.363839 | 3.093022   |
| 15          | 1      | 0    | -1.333123 | -5.965713 | 3.585387   |
| 16          | 6      | 0    | -1.901346 | -4.896653 | 1.800366   |
| 17          | 6      | 0    | -0.732610 | -5.039429 | 0.881177   |
| 18          | 7      | 0    | 4.513597  | -1.386047 | 0.074205   |
| 19          | 8      | 0    | 3.047543  | -3.030948 | -0.688287  |
| 20          | 8      | 0    | 5.834021  | -0.088299 | 1.495210   |
| 21          | 6      | 0    | 3.775135  | -2.581468 | 0.176321   |
| 22          | 6      | 0    | 4.073219  | -3.137881 | 1.524338   |
| 23          | 6      | 0    | 3.596317  | -4.286764 | 2.139614   |
| 24          | 1      | 0    | 2.876518  | -4.932129 | 1.645364   |
| 25          | 6      | 0    | 4.056107  | -4.550734 | 3.437255   |
| 26          | 1      | 0    | 3.705573  | -5.437895 | 3.956980   |
| 27          | 6      | 0    | 4.952075  | -3.686786 | 4.081334   |
| 28          | 1      | 0    | 5.288527  | -3.921989 | 5.087375   |
| 29          | 6      | 0    | 5.409714  | -2.519263 | 3.455124   |
| 30          | 1      | 0    | 6.090393  | -1.834451 | 3.951525   |
| 31          | 6      | 0    | 4.951871  | -2.265642 | 2.170083   |
| 32          | 6      | 0    | 5.198852  | -1.102425 | 1.269622   |
| 33          | 7      | 0    | 1.871872  | 4.418438  | -0.044786  |
| 34          | 8      | 0    | 3.454483  | 2.854010  | -0.743517  |
| 35          | 8      | 0    | 0.609466  | 5.806228  | 1.342021   |
| 36          | 6      | 0    | 3.035295  | 3.638725  | 0.085756   |
| 37          | 6      | 0    | 3.606431  | 3.964818  | 1.423235   |
| 38          | 6      | 0    | 4.743695  | 3.476743  | 2.053037   |
| 39          | 1      | 0    | 5.372328  | 2.726501  | 1.583001   |
| 40          | 6      | 0    | 5.022683  | 3.968126  | 3.336166   |
| 41          | 1      | 0    | 5.901611  | 3.610038  | 3.864485   |

|    |   |   |           |           |           |
|----|---|---|-----------|-----------|-----------|
| 42 | 6 | 0 | 4.184437  | 4.906607  | 3.953240  |
| 43 | 1 | 0 | 4.430170  | 5.266927  | 4.948307  |
| 44 | 6 | 0 | 3.029686  | 5.377559  | 3.313328  |
| 45 | 1 | 0 | 2.364791  | 6.092368  | 3.788249  |
| 46 | 6 | 0 | 2.762304  | 4.888061  | 2.042809  |
| 47 | 6 | 0 | 1.607687  | 5.143265  | 1.134299  |
| 48 | 7 | 0 | -4.597524 | 0.951807  | -0.608797 |
| 49 | 8 | 0 | -3.581857 | 2.991455  | -1.122849 |
| 50 | 8 | 0 | -5.775551 | -0.695867 | 0.556294  |
| 51 | 6 | 0 | -4.359359 | 2.330383  | -0.464251 |
| 52 | 6 | 0 | -5.246655 | 2.781628  | 0.649478  |
| 53 | 6 | 0 | -5.458997 | 4.051275  | 1.166898  |
| 54 | 1 | 0 | -4.935726 | 4.912560  | 0.763156  |
| 55 | 6 | 0 | -6.375313 | 4.172730  | 2.220708  |
| 56 | 1 | 0 | -6.574993 | 5.151504  | 2.647992  |
| 57 | 6 | 0 | -7.044721 | 3.051161  | 2.729920  |
| 58 | 1 | 0 | -7.754272 | 3.178193  | 3.542951  |
| 59 | 6 | 0 | -6.818097 | 1.772810  | 2.201409  |
| 60 | 1 | 0 | -7.332972 | 0.897329  | 2.585136  |
| 61 | 6 | 0 | -5.912115 | 1.665851  | 1.155910  |
| 62 | 6 | 0 | -5.465990 | 0.468782  | 0.383698  |
| 63 | 8 | 0 | -0.091249 | -1.934895 | -0.279357 |
| 64 | 8 | 0 | 0.116951  | -1.920975 | -2.534905 |
| 65 | 8 | 0 | 2.168481  | -0.097818 | -0.079228 |
| 66 | 8 | 0 | 2.336959  | -0.064591 | -2.334401 |
| 67 | 8 | 0 | 0.385258  | 2.165446  | -0.120845 |
| 68 | 8 | 0 | 0.503629  | 2.217875  | -2.383013 |
| 69 | 8 | 0 | -1.948562 | 0.287811  | -0.359205 |
| 70 | 8 | 0 | -1.779428 | 0.278917  | -2.617510 |
| 71 | 6 | 0 | -0.032868 | -2.496187 | -1.421302 |
| 72 | 6 | 0 | -0.100888 | -4.038989 | -1.341130 |
| 73 | 1 | 0 | 0.858278  | -4.315858 | -0.887409 |
| 74 | 6 | 0 | -0.224194 | -4.859797 | -2.664669 |
| 75 | 6 | 0 | -0.314619 | -6.354343 | -2.285350 |
| 76 | 1 | 0 | -0.287612 | -6.966657 | -3.194068 |
| 77 | 1 | 0 | -1.247229 | -6.584039 | -1.758431 |
| 78 | 1 | 0 | 0.519877  | -6.660162 | -1.643941 |
| 79 | 6 | 0 | -1.452403 | -4.480415 | -3.512499 |
| 80 | 1 | 0 | -1.425567 | -3.428737 | -3.806937 |
| 81 | 1 | 0 | -2.387605 | -4.656173 | -2.973044 |
| 82 | 1 | 0 | -1.468613 | -5.092930 | -4.422615 |
| 83 | 6 | 0 | 1.065896  | -4.651580 | -3.489036 |
| 84 | 1 | 0 | 1.165693  | -3.617552 | -3.824067 |
| 85 | 1 | 0 | 1.045561  | -5.300725 | -4.372646 |



|     |   |   |           |           |           |
|-----|---|---|-----------|-----------|-----------|
| 86  | 1 | 0 | 1.957308  | -4.907430 | -2.903815 |
| 87  | 6 | 0 | 2.819446  | -0.177387 | -1.176808 |
| 88  | 6 | 0 | 4.337713  | -0.384535 | -0.984671 |
| 89  | 1 | 0 | 4.678599  | 0.551138  | -0.526722 |
| 90  | 6 | 0 | 5.226904  | -0.610949 | -2.251755 |
| 91  | 6 | 0 | 4.801769  | -1.828786 | -3.093845 |
| 92  | 1 | 0 | 4.859450  | -2.759143 | -2.521271 |
| 93  | 1 | 0 | 5.473834  | -1.923262 | -3.955859 |
| 94  | 1 | 0 | 3.780079  | -1.723797 | -3.464951 |
| 95  | 6 | 0 | 6.681655  | -0.815162 | -1.774567 |
| 96  | 1 | 0 | 6.796673  | -1.745214 | -1.207293 |
| 97  | 1 | 0 | 7.020843  | 0.011567  | -1.140111 |
| 98  | 1 | 0 | 7.347758  | -0.873166 | -2.643001 |
| 99  | 6 | 0 | 5.183048  | 0.667245  | -3.118454 |
| 100 | 1 | 0 | 5.473831  | 1.551635  | -2.539148 |
| 101 | 1 | 0 | 4.186465  | 0.843053  | -3.527212 |
| 102 | 1 | 0 | 5.886018  | 0.565410  | -3.953818 |
| 103 | 6 | 0 | 0.570072  | 2.747478  | -1.242108 |
| 104 | 6 | 0 | 0.862919  | 4.261394  | -1.102689 |
| 105 | 1 | 0 | -0.045309 | 4.679929  | -0.651754 |
| 106 | 6 | 0 | 1.135762  | 5.096008  | -2.395328 |
| 107 | 6 | 0 | -0.140409 | 5.072010  | -3.265479 |
| 108 | 1 | 0 | -1.011513 | 5.436942  | -2.706590 |
| 109 | 1 | 0 | -0.363162 | 4.066713  | -3.628308 |
| 110 | 1 | 0 | -0.004256 | 5.728394  | -4.132949 |
| 111 | 6 | 0 | 1.398443  | 6.556732  | -1.967910 |
| 112 | 1 | 0 | 0.582927  | 6.954328  | -1.352803 |
| 113 | 1 | 0 | 1.491074  | 7.188661  | -2.858523 |
| 114 | 1 | 0 | 2.329218  | 6.651615  | -1.397939 |
| 115 | 6 | 0 | 2.337861  | 4.591983  | -3.216784 |
| 116 | 1 | 0 | 2.191501  | 3.563560  | -3.552758 |
| 117 | 1 | 0 | 3.268388  | 4.631869  | -2.642672 |
| 118 | 1 | 0 | 2.462425  | 5.230281  | -4.100208 |
| 119 | 6 | 0 | -2.432983 | 0.257947  | -1.538123 |
| 120 | 6 | 0 | -3.965603 | 0.075922  | -1.600000 |
| 121 | 1 | 0 | -4.114707 | -0.933069 | -1.196796 |
| 122 | 6 | 0 | -4.660460 | 0.100412  | -3.007005 |
| 123 | 6 | 0 | -4.161365 | -1.111533 | -3.826198 |
| 124 | 1 | 0 | -3.101066 | -1.025154 | -4.068514 |
| 125 | 1 | 0 | -4.725611 | -1.172637 | -4.764531 |
| 126 | 1 | 0 | -4.310875 | -2.049968 | -3.280189 |
| 127 | 6 | 0 | -6.180953 | -0.074001 | -2.793245 |
| 128 | 1 | 0 | -6.626627 | 0.789072  | -2.285945 |
| 129 | 1 | 0 | -6.408651 | -0.969903 | -2.204893 |

|     |   |   |           |           |           |
|-----|---|---|-----------|-----------|-----------|
| 130 | 1 | 0 | -6.676134 | -0.172183 | -3.765960 |
| 131 | 6 | 0 | -4.415194 | 1.399829  | -3.798146 |
| 132 | 1 | 0 | -3.350920 | 1.562235  | -3.980439 |
| 133 | 1 | 0 | -4.807331 | 2.278167  | -3.277035 |
| 134 | 1 | 0 | -4.924616 | 1.332874  | -4.767672 |
| 135 | 6 | 0 | -2.487895 | 2.816130  | 3.211225  |
| 136 | 6 | 0 | -3.374326 | 1.986866  | 3.908904  |
| 137 | 6 | 0 | -3.187241 | 0.599937  | 3.976352  |
| 138 | 6 | 0 | -2.069032 | 0.072656  | 3.345061  |
| 139 | 6 | 0 | -1.164743 | 0.895508  | 2.630233  |
| 140 | 6 | 0 | -1.387095 | 2.271415  | 2.546598  |
| 141 | 7 | 0 | -1.638173 | -1.255041 | 3.283553  |
| 142 | 6 | 0 | -0.415052 | -1.361863 | 2.636544  |
| 143 | 6 | 0 | -0.183933 | 0.024927  | 1.981407  |
| 144 | 8 | 0 | 0.296365  | -2.341999 | 2.603501  |
| 145 | 1 | 0 | -2.666653 | 3.885583  | 3.170790  |
| 146 | 1 | 0 | -4.239869 | 2.423910  | 4.398398  |
| 147 | 1 | 0 | -3.888299 | -0.034586 | 4.510195  |
| 148 | 1 | 0 | -0.713367 | 2.895983  | 1.971307  |
| 149 | 1 | 0 | -2.069809 | -2.040653 | 3.751899  |
| 150 | 7 | 0 | 1.448658  | 0.383124  | 2.671749  |
| 151 | 7 | 0 | 2.531284  | 0.601114  | 2.543998  |

-----

### Carbenoid complex (16)

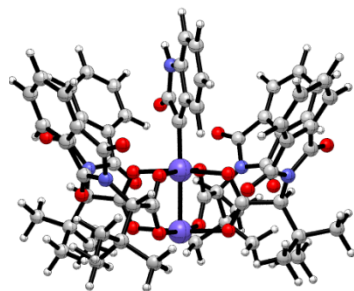

|                                              |                             |
|----------------------------------------------|-----------------------------|
| Zero-point correction=                       | 1.165152 (Hartree/Particle) |
| Thermal correction to Energy=                | 1.248209                    |
| Thermal correction to Enthalpy=              | 1.249153                    |
| Thermal correction to Gibbs Free Energy=     | 1.041267                    |
| Sum of electronic and zero-point Energies=   | -4246.263947                |
| Sum of electronic and thermal Energies=      | -4246.180889                |
| Sum of electronic and thermal Enthalpies=    | -4246.179945                |
| Sum of electronic and thermal Free Energies= | -4246.387831                |

-----

| Center | Atomic | Atomic | Coordinates (Angstroms) |
|--------|--------|--------|-------------------------|
|--------|--------|--------|-------------------------|

| Number<br>Z | Number | Type | X         | Y         |           |
|-------------|--------|------|-----------|-----------|-----------|
| 1           | 45     | 0    | -0.048058 | -0.081471 | -0.107620 |
| 2           | 45     | 0    | -0.177435 | 0.011189  | -2.572581 |
| 3           | 7      | 0    | 1.390419  | 4.358847  | -0.111626 |
| 4           | 8      | 0    | 3.060944  | 2.943219  | -0.913742 |
| 5           | 8      | 0    | 0.104609  | 5.658294  | 1.341743  |
| 6           | 6      | 0    | 2.618169  | 3.678584  | -0.050622 |
| 7           | 6      | 0    | 3.228623  | 4.038574  | 1.259473  |
| 8           | 6      | 0    | 4.438257  | 3.647135  | 1.816963  |
| 9           | 1      | 0    | 5.100894  | 2.961785  | 1.296613  |
| 10          | 6      | 0    | 4.746804  | 4.153536  | 3.087426  |
| 11          | 1      | 0    | 5.683549  | 3.873115  | 3.561006  |
| 12          | 6      | 0    | 3.867225  | 5.012550  | 3.760436  |
| 13          | 1      | 0    | 4.138177  | 5.388701  | 4.743218  |
| 14          | 6      | 0    | 2.642416  | 5.387155  | 3.190693  |
| 15          | 1      | 0    | 1.948260  | 6.042055  | 3.708321  |
| 16          | 6      | 0    | 2.344731  | 4.882930  | 1.932938  |
| 17          | 6      | 0    | 1.129034  | 5.056505  | 1.083918  |
| 18          | 7      | 0    | -4.401422 | 1.543960  | 0.066133  |
| 19          | 8      | 0    | -2.915012 | 3.213466  | -0.601014 |
| 20          | 8      | 0    | -5.734595 | 0.188315  | 1.420028  |
| 21          | 6      | 0    | -3.670477 | 2.737492  | 0.224358  |
| 22          | 6      | 0    | -4.025605 | 3.261926  | 1.572309  |
| 23          | 6      | 0    | -3.601879 | 4.411508  | 2.222871  |
| 24          | 1      | 0    | -2.884509 | 5.084326  | 1.762819  |
| 25          | 6      | 0    | -4.113140 | 4.644044  | 3.506796  |
| 26          | 1      | 0    | -3.806714 | 5.533121  | 4.050890  |
| 27          | 6      | 0    | -5.008149 | 3.746862  | 4.105524  |
| 28          | 1      | 0    | -5.387877 | 3.958205  | 5.101545  |
| 29          | 6      | 0    | -5.413506 | 2.579739  | 3.443998  |
| 30          | 1      | 0    | -6.096273 | 1.871080  | 3.902827  |
| 31          | 6      | 0    | -4.905110 | 2.360023  | 2.171913  |
| 32          | 6      | 0    | -5.106726 | 1.216044  | 1.236561  |
| 33          | 7      | 0    | -1.894244 | -4.328692 | -0.313559 |
| 34          | 8      | 0    | -3.408123 | -2.663004 | -0.923280 |
| 35          | 8      | 0    | -0.700426 | -5.857863 | 0.983088  |
| 36          | 6      | 0    | -3.016303 | -3.499284 | -0.132143 |
| 37          | 6      | 0    | -3.586611 | -3.855992 | 1.197178  |
| 38          | 6      | 0    | -4.688636 | -3.337864 | 1.864531  |
| 39          | 1      | 0    | -5.279576 | -2.531825 | 1.439753  |
| 40          | 6      | 0    | -4.981147 | -3.877090 | 3.125197  |
| 41          | 1      | 0    | -5.834003 | -3.498841 | 3.681631  |

|    |   |   |           |           |           |
|----|---|---|-----------|-----------|-----------|
| 42 | 6 | 0 | -4.190500 | -4.890763 | 3.683532  |
| 43 | 1 | 0 | -4.447121 | -5.288263 | 4.661695  |
| 44 | 6 | 0 | -3.070073 | -5.391259 | 3.006380  |
| 45 | 1 | 0 | -2.441787 | -6.165577 | 3.435760  |
| 46 | 6 | 0 | -2.787578 | -4.852842 | 1.759256  |
| 47 | 6 | 0 | -1.657976 | -5.125706 | 0.824247  |
| 48 | 7 | 0 | 4.595625  | -1.086300 | -0.457391 |
| 49 | 8 | 0 | 3.431773  | -3.060260 | -0.914929 |
| 50 | 8 | 0 | 5.855920  | 0.518983  | 0.679824  |
| 51 | 6 | 0 | 4.232355  | -2.427464 | -0.253530 |
| 52 | 6 | 0 | 5.010093  | -2.885796 | 0.936381  |
| 53 | 6 | 0 | 5.083062  | -4.137630 | 1.530989  |
| 54 | 1 | 0 | 4.521050  | -4.977736 | 1.134007  |
| 55 | 6 | 0 | 5.915594  | -4.270874 | 2.650973  |
| 56 | 1 | 0 | 6.005674  | -5.236632 | 3.140523  |
| 57 | 6 | 0 | 6.640189  | -3.178807 | 3.147540  |
| 58 | 1 | 0 | 7.278311  | -3.313994 | 4.016327  |
| 59 | 6 | 0 | 6.558805  | -1.919539 | 2.537739  |
| 60 | 1 | 0 | 7.118834  | -1.067665 | 2.910838  |
| 61 | 6 | 0 | 5.735608  | -1.800696 | 1.427235  |
| 62 | 6 | 0 | 5.448559  | -0.620930 | 0.559082  |
| 63 | 8 | 0 | 0.219624  | 1.962000  | -0.151347 |
| 64 | 8 | 0 | 0.071084  | 2.062996  | -2.410548 |
| 65 | 8 | 0 | -2.093156 | 0.206846  | -0.118848 |
| 66 | 8 | 0 | -2.221601 | 0.287977  | -2.380452 |
| 67 | 8 | 0 | -0.345821 | -2.125908 | -0.279160 |
| 68 | 8 | 0 | -0.461796 | -2.057844 | -2.540545 |
| 69 | 8 | 0 | 2.001378  | -0.337289 | -0.313384 |
| 70 | 8 | 0 | 1.891801  | -0.207535 | -2.572542 |
| 71 | 6 | 0 | 0.213300  | 2.577439  | -1.268652 |
| 72 | 6 | 0 | 0.349489  | 4.109337  | -1.117822 |
| 73 | 1 | 0 | -0.581089 | 4.407888  | -0.620524 |
| 74 | 6 | 0 | 0.470707  | 4.981147  | -2.409647 |
| 75 | 6 | 0 | 0.612994  | 6.455944  | -1.972336 |
| 76 | 1 | 0 | 0.590550  | 7.104337  | -2.855793 |
| 77 | 1 | 0 | 1.560900  | 6.637053  | -1.453712 |
| 78 | 1 | 0 | -0.200855 | 6.761267  | -1.305054 |
| 79 | 6 | 0 | 1.674103  | 4.602990  | -3.293224 |
| 80 | 1 | 0 | 1.611011  | 3.567261  | -3.633853 |
| 81 | 1 | 0 | 2.622013  | 4.727034  | -2.760944 |
| 82 | 1 | 0 | 1.697113  | 5.256008  | -4.174651 |
| 83 | 6 | 0 | -0.839535 | 4.846847  | -3.217375 |
| 84 | 1 | 0 | -0.971929 | 3.835102  | -3.604810 |
| 85 | 1 | 0 | -0.819413 | 5.541790  | -4.065481 |

|     |   |   |           |           |           |
|-----|---|---|-----------|-----------|-----------|
| 86  | 1 | 0 | -1.713019 | 5.091750  | -2.601526 |
| 87  | 6 | 0 | -2.714967 | 0.357836  | -1.223082 |
| 88  | 6 | 0 | -4.230069 | 0.591309  | -1.037169 |
| 89  | 1 | 0 | -4.593271 | -0.358190 | -0.627747 |
| 90  | 6 | 0 | -5.102292 | 0.893881  | -2.300045 |
| 91  | 6 | 0 | -4.643656 | 2.136636  | -3.086957 |
| 92  | 1 | 0 | -4.693631 | 3.045080  | -2.479433 |
| 93  | 1 | 0 | -5.301144 | 2.276719  | -3.954055 |
| 94  | 1 | 0 | -3.618567 | 2.027044  | -3.447233 |
| 95  | 6 | 0 | -6.557060 | 1.108970  | -1.827832 |
| 96  | 1 | 0 | -6.658064 | 2.016278  | -1.222223 |
| 97  | 1 | 0 | -6.920358 | 0.263051  | -1.233045 |
| 98  | 1 | 0 | -7.213118 | 1.218464  | -2.699042 |
| 99  | 6 | 0 | -5.077101 | -0.346106 | -3.221246 |
| 100 | 1 | 0 | -5.397476 | -1.247362 | -2.685137 |
| 101 | 1 | 0 | -4.078822 | -0.527984 | -3.623039 |
| 102 | 1 | 0 | -5.765055 | -0.191064 | -4.061044 |
| 103 | 6 | 0 | -0.544361 | -2.643514 | -1.431242 |
| 104 | 6 | 0 | -0.881918 | -4.153469 | -1.364623 |
| 105 | 1 | 0 | 0.013524  | -4.622495 | -0.938191 |
| 106 | 6 | 0 | -1.183724 | -4.908668 | -2.698868 |
| 107 | 6 | 0 | 0.089860  | -4.878529 | -3.572636 |
| 108 | 1 | 0 | 0.950003  | -5.301537 | -3.038048 |
| 109 | 1 | 0 | 0.343580  | -3.862703 | -3.882015 |
| 110 | 1 | 0 | -0.069536 | -5.482429 | -4.473609 |
| 111 | 6 | 0 | -1.491910 | -6.381244 | -2.349732 |
| 112 | 1 | 0 | -0.687860 | -6.837092 | -1.760708 |
| 113 | 1 | 0 | -1.608000 | -6.960903 | -3.272629 |
| 114 | 1 | 0 | -2.423293 | -6.476437 | -1.780898 |
| 115 | 6 | 0 | -2.372015 | -4.322284 | -3.484851 |
| 116 | 1 | 0 | -2.195446 | -3.281160 | -3.761827 |
| 117 | 1 | 0 | -3.300979 | -4.366405 | -2.908445 |
| 118 | 1 | 0 | -2.520064 | -4.904599 | -4.402776 |
| 119 | 6 | 0 | 2.516289  | -0.282778 | -1.481501 |
| 120 | 6 | 0 | 4.058115  | -0.204052 | -1.498656 |
| 121 | 1 | 0 | 4.263977  | 0.805997  | -1.123159 |
| 122 | 6 | 0 | 4.789391  | -0.326755 | -2.881549 |
| 123 | 6 | 0 | 4.428721  | 0.905765  | -3.741674 |
| 124 | 1 | 0 | 3.371401  | 0.914185  | -4.010236 |
| 125 | 1 | 0 | 5.019857  | 0.891281  | -4.665301 |
| 126 | 1 | 0 | 4.653483  | 1.839065  | -3.212130 |
| 127 | 6 | 0 | 6.312216  | -0.290565 | -2.624691 |
| 128 | 1 | 0 | 6.658375  | -1.177787 | -2.082653 |
| 129 | 1 | 0 | 6.606845  | 0.595629  | -2.051536 |

|     |   |   |           |           |           |
|-----|---|---|-----------|-----------|-----------|
| 130 | 1 | 0 | 6.842303  | -0.265417 | -3.583498 |
| 131 | 6 | 0 | 4.442904  | -1.617784 | -3.648180 |
| 132 | 1 | 0 | 3.374094  | -1.679707 | -3.864476 |
| 133 | 1 | 0 | 4.728999  | -2.514621 | -3.090507 |
| 134 | 1 | 0 | 4.987198  | -1.629083 | -4.600628 |
| 135 | 6 | 0 | 1.783763  | -3.169479 | 3.398716  |
| 136 | 6 | 0 | 1.520851  | -2.825355 | 4.738658  |
| 137 | 6 | 0 | 0.806380  | -1.676128 | 5.097897  |
| 138 | 6 | 0 | 0.348851  | -0.864787 | 4.067760  |
| 139 | 6 | 0 | 0.601578  | -1.189384 | 2.690030  |
| 140 | 6 | 0 | 1.332561  | -2.358075 | 2.368423  |
| 141 | 7 | 0 | -0.374445 | 0.307941  | 4.123621  |
| 142 | 6 | 0 | -0.648059 | 0.776463  | 2.824431  |
| 143 | 6 | 0 | 0.020653  | -0.208700 | 1.859327  |
| 144 | 8 | 0 | -1.293480 | 1.769878  | 2.577585  |
| 145 | 1 | 0 | 2.343013  | -4.072045 | 3.178128  |
| 146 | 1 | 0 | 1.885841  | -3.476073 | 5.529350  |
| 147 | 1 | 0 | 0.620050  | -1.437586 | 6.140520  |
| 148 | 1 | 0 | 1.514309  | -2.599617 | 1.327920  |
| 149 | 1 | 0 | -0.726714 | 0.758517  | 4.956142  |

-----

**End-on transition state leading to *trans* cyclopropane from Si-face (TS-17a)**

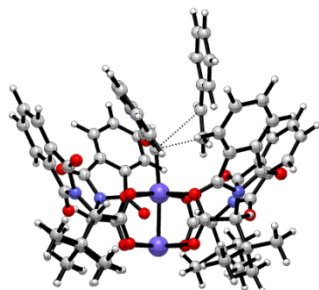

|                                              |                             |
|----------------------------------------------|-----------------------------|
| Zero-point correction=                       | 1.300279 (Hartree/Particle) |
| Thermal correction to Energy=                | 1.390888                    |
| Thermal correction to Enthalpy=              | 1.391833                    |
| Thermal correction to Gibbs Free Energy=     | 1.167976                    |
| Sum of electronic and zero-point Energies=   | -4555.770853                |
| Sum of electronic and thermal Energies=      | -4555.680244                |
| Sum of electronic and thermal Enthalpies=    | -4555.679299                |
| Sum of electronic and thermal Free Energies= | -4555.903156                |

-----

| Center<br>Number | Atomic<br>Number | Atomic<br>Type | Coordinates (Angstroms) |   |
|------------------|------------------|----------------|-------------------------|---|
| Z                |                  |                | X                       | Y |

-----

|    |    |   |           |           |           |
|----|----|---|-----------|-----------|-----------|
| 1  | 45 | 0 | -0.230948 | 0.001133  | -0.418277 |
| 2  | 45 | 0 | -0.727886 | 0.469356  | -2.793948 |
| 3  | 7  | 0 | 1.965537  | 4.188223  | -0.257111 |
| 4  | 8  | 0 | 3.191076  | 2.677933  | -1.541597 |
| 5  | 8  | 0 | 1.254410  | 5.492665  | 1.545051  |
| 6  | 6  | 0 | 3.073909  | 3.379037  | -0.553461 |
| 7  | 6  | 0 | 4.028949  | 3.553435  | 0.577577  |
| 8  | 6  | 0 | 5.279179  | 2.986890  | 0.784273  |
| 9  | 1  | 0 | 5.701094  | 2.284204  | 0.072160  |
| 10 | 6  | 0 | 5.951571  | 3.341630  | 1.962381  |
| 11 | 1  | 0 | 6.933061  | 2.921811  | 2.164318  |
| 12 | 6  | 0 | 5.379686  | 4.225217  | 2.887644  |
| 13 | 1  | 0 | 5.928617  | 4.479958  | 3.790101  |
| 14 | 6  | 0 | 4.109863  | 4.778630  | 2.671790  |
| 15 | 1  | 0 | 3.652873  | 5.455466  | 3.387178  |
| 16 | 6  | 0 | 3.451683  | 4.424727  | 1.502871  |
| 17 | 6  | 0 | 2.097945  | 4.806403  | 1.001493  |
| 18 | 7  | 0 | -4.151539 | 2.257606  | 0.705689  |
| 19 | 8  | 0 | -2.520107 | 3.752640  | -0.034531 |
| 20 | 8  | 0 | -5.474471 | 0.963842  | 2.129232  |
| 21 | 6  | 0 | -3.219452 | 3.301951  | 0.852770  |
| 22 | 6  | 0 | -3.288936 | 3.717845  | 2.281383  |
| 23 | 6  | 0 | -2.600625 | 4.715624  | 2.954979  |
| 24 | 1  | 0 | -1.863030 | 5.329426  | 2.446839  |
| 25 | 6  | 0 | -2.878314 | 4.875472  | 4.319363  |
| 26 | 1  | 0 | -2.360900 | 5.646318  | 4.883732  |
| 27 | 6  | 0 | -3.809343 | 4.055315  | 4.970713  |
| 28 | 1  | 0 | -4.004673 | 4.207363  | 6.028857  |
| 29 | 6  | 0 | -4.486182 | 3.040277  | 4.280877  |
| 30 | 1  | 0 | -5.202345 | 2.392588  | 4.777581  |
| 31 | 6  | 0 | -4.206060 | 2.891677  | 2.930450  |
| 32 | 6  | 0 | -4.721672 | 1.903013  | 1.939958  |
| 33 | 7  | 0 | -2.873532 | -3.807341 | -0.812060 |
| 34 | 8  | 0 | -4.111116 | -1.833268 | -0.915342 |
| 35 | 8  | 0 | -1.859698 | -5.739399 | 0.016420  |
| 36 | 6  | 0 | -3.777799 | -2.845181 | -0.329113 |
| 37 | 6  | 0 | -4.220772 | -3.326066 | 1.009938  |
| 38 | 6  | 0 | -5.102074 | -2.753393 | 1.917478  |
| 39 | 1  | 0 | -5.571232 | -1.793826 | 1.720581  |
| 40 | 6  | 0 | -5.332163 | -3.453391 | 3.110238  |
| 41 | 1  | 0 | -6.015542 | -3.040955 | 3.847268  |
| 42 | 6  | 0 | -4.695430 | -4.674737 | 3.370016  |
| 43 | 1  | 0 | -4.900861 | -5.194553 | 4.301961  |
| 44 | 6  | 0 | -3.793681 | -5.231059 | 2.452435  |

|    |   |   |           |           |           |
|----|---|---|-----------|-----------|-----------|
| 45 | 1 | 0 | -3.285176 | -6.169842 | 2.649182  |
| 46 | 6 | 0 | -3.571083 | -4.532207 | 1.274793  |
| 47 | 6 | 0 | -2.655175 | -4.827649 | 0.134182  |
| 48 | 7 | 0 | 4.135617  | -1.494633 | -1.648518 |
| 49 | 8 | 0 | 2.680744  | -3.306430 | -1.910438 |
| 50 | 8 | 0 | 5.804535  | -0.108636 | -0.780326 |
| 51 | 6 | 0 | 3.652578  | -2.789416 | -1.395311 |
| 52 | 6 | 0 | 4.566340  | -3.374475 | -0.367757 |
| 53 | 6 | 0 | 4.577349  | -4.637914 | 0.205558  |
| 54 | 1 | 0 | 3.839728  | -5.383947 | -0.073784 |
| 55 | 6 | 0 | 5.580563  | -4.909303 | 1.146756  |
| 56 | 1 | 0 | 5.628177  | -5.890052 | 1.611818  |
| 57 | 6 | 0 | 6.530032  | -3.937695 | 1.493111  |
| 58 | 1 | 0 | 7.298359  | -4.179620 | 2.222102  |
| 59 | 6 | 0 | 6.507109  | -2.663557 | 0.908603  |
| 60 | 1 | 0 | 7.238414  | -1.904091 | 1.167093  |
| 61 | 6 | 0 | 5.512238  | -2.408580 | -0.024658 |
| 62 | 6 | 0 | 5.226989  | -1.178869 | -0.821361 |
| 63 | 8 | 0 | 0.396611  | 1.974651  | -0.282032 |
| 64 | 8 | 0 | -0.101361 | 2.414579  | -2.447245 |
| 65 | 8 | 0 | -2.170603 | 0.601343  | -0.035546 |
| 66 | 8 | 0 | -2.638483 | 1.037201  | -2.211154 |
| 67 | 8 | 0 | -0.942684 | -1.917756 | -0.792167 |
| 68 | 8 | 0 | -1.382752 | -1.500927 | -2.974049 |
| 69 | 8 | 0 | 1.708074  | -0.517591 | -1.012213 |
| 70 | 8 | 0 | 1.243191  | -0.078655 | -3.184190 |
| 71 | 6 | 0 | 0.308994  | 2.738691  | -1.301085 |
| 72 | 6 | 0 | 0.710654  | 4.205024  | -1.020196 |
| 73 | 1 | 0 | -0.039015 | 4.550852  | -0.298899 |
| 74 | 6 | 0 | 0.696904  | 5.222521  | -2.209539 |
| 75 | 6 | 0 | 1.143012  | 6.597651  | -1.664959 |
| 76 | 1 | 0 | 1.047097  | 7.351606  | -2.454679 |
| 77 | 1 | 0 | 2.190776  | 6.589643  | -1.344111 |
| 78 | 1 | 0 | 0.530970  | 6.916356  | -0.813883 |
| 79 | 6 | 0 | 1.625973  | 4.823222  | -3.371864 |
| 80 | 1 | 0 | 1.343522  | 3.857513  | -3.795668 |
| 81 | 1 | 0 | 2.671792  | 4.762902  | -3.054816 |
| 82 | 1 | 0 | 1.561065  | 5.580915  | -4.162759 |
| 83 | 6 | 0 | -0.754312 | 5.362183  | -2.721096 |
| 84 | 1 | 0 | -1.114105 | 4.434247  | -3.168841 |
| 85 | 1 | 0 | -0.798432 | 6.152701  | -3.479991 |
| 86 | 1 | 0 | -1.438152 | 5.633885  | -1.908733 |
| 87 | 6 | 0 | -2.920817 | 1.006779  | -0.982721 |
| 88 | 6 | 0 | -4.323708 | 1.441686  | -0.502725 |



|     |   |   |           |           |           |
|-----|---|---|-----------|-----------|-----------|
| 89  | 1 | 0 | -4.774936 | 0.513101  | -0.136419 |
| 90  | 6 | 0 | -5.321407 | 2.039964  | -1.548658 |
| 91  | 6 | 0 | -4.789385 | 3.300587  | -2.256122 |
| 92  | 1 | 0 | -4.603510 | 4.114800  | -1.549396 |
| 93  | 1 | 0 | -5.534093 | 3.650903  | -2.981903 |
| 94  | 1 | 0 | -3.857918 | 3.096947  | -2.788218 |
| 95  | 6 | 0 | -6.629263 | 2.396171  | -0.807588 |
| 96  | 1 | 0 | -6.484956 | 3.218357  | -0.098055 |
| 97  | 1 | 0 | -7.028819 | 1.538414  | -0.254642 |
| 98  | 1 | 0 | -7.386473 | 2.715313  | -1.533059 |
| 99  | 6 | 0 | -5.648028 | 0.950608  | -2.594335 |
| 100 | 1 | 0 | -6.022714 | 0.038429  | -2.115149 |
| 101 | 1 | 0 | -4.769670 | 0.685004  | -3.185028 |
| 102 | 1 | 0 | -6.425297 | 1.318369  | -3.275161 |
| 103 | 6 | 0 | -1.409822 | -2.218530 | -1.939758 |
| 104 | 6 | 0 | -2.021185 | -3.642414 | -1.998381 |
| 105 | 1 | 0 | -1.179925 | -4.319526 | -1.805624 |
| 106 | 6 | 0 | -2.674431 | -4.115157 | -3.338438 |
| 107 | 6 | 0 | -1.573333 | -4.174054 | -4.420186 |
| 108 | 1 | 0 | -0.747681 | -4.828114 | -4.111218 |
| 109 | 1 | 0 | -1.166030 | -3.184326 | -4.635921 |
| 110 | 1 | 0 | -1.990338 | -4.584235 | -5.347497 |
| 111 | 6 | 0 | -3.215565 | -5.546157 | -3.126968 |
| 112 | 1 | 0 | -2.440539 | -6.224070 | -2.752016 |
| 113 | 1 | 0 | -3.584333 | -5.943076 | -4.079758 |
| 114 | 1 | 0 | -4.050154 | -5.562951 | -2.417542 |
| 115 | 6 | 0 | -3.828571 | -3.210995 | -3.810889 |
| 116 | 1 | 0 | -3.492768 | -2.185812 | -3.977311 |
| 117 | 1 | 0 | -4.645181 | -3.185632 | -3.083274 |
| 118 | 1 | 0 | -4.232385 | -3.602225 | -4.753032 |
| 119 | 6 | 0 | 2.021265  | -0.385207 | -2.242313 |
| 120 | 6 | 0 | 3.529076  | -0.513601 | -2.556459 |
| 121 | 1 | 0 | 3.939636  | 0.446506  | -2.218302 |
| 122 | 6 | 0 | 3.957950  | -0.679518 | -4.058143 |
| 123 | 6 | 0 | 3.660142  | 0.640133  | -4.806014 |
| 124 | 1 | 0 | 2.589477  | 0.842008  | -4.855133 |
| 125 | 1 | 0 | 4.048120  | 0.573960  | -5.829543 |
| 126 | 1 | 0 | 4.147101  | 1.492116  | -4.316510 |
| 127 | 6 | 0 | 5.485201  | -0.907935 | -4.105143 |
| 128 | 1 | 0 | 5.770808  | -1.873580 | -3.672763 |
| 129 | 1 | 0 | 6.030098  | -0.120633 | -3.572308 |
| 130 | 1 | 0 | 5.821258  | -0.905036 | -5.148168 |
| 131 | 6 | 0 | 3.253897  | -1.851369 | -4.769220 |
| 132 | 1 | 0 | 2.169341  | -1.720506 | -4.772955 |

|     |   |   |           |           |           |
|-----|---|---|-----------|-----------|-----------|
| 133 | 1 | 0 | 3.478565  | -2.812034 | -4.296319 |
| 134 | 1 | 0 | 3.596411  | -1.901849 | -5.810211 |
| 135 | 6 | 0 | 0.654737  | -4.213555 | 2.073594  |
| 136 | 6 | 0 | 0.040603  | -4.310159 | 3.332828  |
| 137 | 6 | 0 | -0.521452 | -3.199778 | 3.972141  |
| 138 | 6 | 0 | -0.450043 | -1.978693 | 3.312119  |
| 139 | 6 | 0 | 0.168976  | -1.850227 | 2.033374  |
| 140 | 6 | 0 | 0.723735  | -2.987980 | 1.417921  |
| 141 | 7 | 0 | -0.938899 | -0.740761 | 3.698287  |
| 142 | 6 | 0 | -0.747353 | 0.212136  | 2.686133  |
| 143 | 6 | 0 | 0.016784  | -0.503268 | 1.556048  |
| 144 | 8 | 0 | -1.135970 | 1.358762  | 2.746547  |
| 145 | 1 | 0 | 1.054852  | -5.105185 | 1.602341  |
| 146 | 1 | 0 | -0.009894 | -5.278111 | 3.824767  |
| 147 | 1 | 0 | -1.000662 | -3.295302 | 4.941855  |
| 148 | 1 | 0 | 1.171427  | -2.902456 | 0.434331  |
| 149 | 1 | 0 | -1.509714 | -0.555909 | 4.511209  |
| 150 | 6 | 0 | 2.092588  | 0.487152  | 3.324373  |
| 151 | 1 | 0 | 1.623134  | 1.296568  | 3.881494  |
| 152 | 6 | 0 | 2.023860  | 0.544505  | 1.959620  |
| 153 | 1 | 0 | 2.536035  | -0.159593 | 1.314078  |
| 154 | 1 | 0 | 1.643537  | 1.435104  | 1.474380  |
| 155 | 6 | 0 | 2.669658  | -0.570245 | 4.135462  |
| 156 | 6 | 0 | 2.527766  | -0.505937 | 5.538985  |
| 157 | 6 | 0 | 3.362918  | -1.670716 | 3.586329  |
| 158 | 6 | 0 | 3.049614  | -1.499388 | 6.360534  |
| 159 | 1 | 0 | 1.999567  | 0.338331  | 5.975684  |
| 160 | 6 | 0 | 3.880883  | -2.665343 | 4.409369  |
| 161 | 1 | 0 | 3.504605  | -1.740870 | 2.513501  |
| 162 | 6 | 0 | 3.726287  | -2.585643 | 5.797049  |
| 163 | 1 | 0 | 2.930804  | -1.430020 | 7.438363  |
| 164 | 1 | 0 | 4.411312  | -3.503036 | 3.965885  |
| 165 | 1 | 0 | 4.135772  | -3.363092 | 6.436409  |

-----

**End-on transition state leading to *trans* cyclopropane from Re-face (TS-17b)**

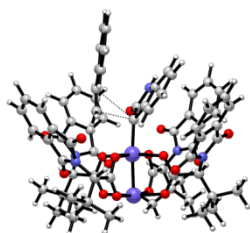

Zero-point correction= 1.300301 (Hartree/Particle)  
 Thermal correction to Energy= 1.390870

|                                              |              |
|----------------------------------------------|--------------|
| Thermal correction to Enthalpy=              | 1.391814     |
| Thermal correction to Gibbs Free Energy=     | 1.167820     |
| Sum of electronic and zero-point Energies=   | -4555.769247 |
| Sum of electronic and thermal Energies=      | -4555.678678 |
| Sum of electronic and thermal Enthalpies=    | -4555.677734 |
| Sum of electronic and thermal Free Energies= | -4555.901728 |

---

| Center<br>Number | Atomic<br>Number | Atomic<br>Type | Coordinates (Angstroms) |           |           |
|------------------|------------------|----------------|-------------------------|-----------|-----------|
|                  |                  |                | X                       | Y         | Z         |
| 1                | 45               | 0              | -0.028298               | 0.080815  | -0.452983 |
| 2                | 45               | 0              | -0.043841               | 0.626765  | -2.864085 |
| 3                | 7                | 0              | 1.608931                | 4.339154  | 0.445868  |
| 4                | 8                | 0              | 3.307323                | 3.036795  | -0.482742 |
| 5                | 8                | 0              | 0.226445                | 5.374205  | 2.018838  |
| 6                | 6                | 0              | 2.789412                | 3.577829  | 0.475926  |
| 7                | 6                | 0              | 3.246990                | 3.572663  | 1.894093  |
| 8                | 6                | 0              | 4.356059                | 2.967463  | 2.470086  |
| 9                | 1                | 0              | 5.047145                | 2.379160  | 1.873062  |
| 10               | 6                | 0              | 4.521471                | 3.127484  | 3.853056  |
| 11               | 1                | 0              | 5.376287                | 2.672067  | 4.345443  |
| 12               | 6                | 0              | 3.602996                | 3.865203  | 4.613820  |
| 13               | 1                | 0              | 3.764763                | 3.975941  | 5.682873  |
| 14               | 6                | 0              | 2.481487                | 4.460831  | 4.018869  |
| 15               | 1                | 0              | 1.760210                | 5.028395  | 4.599056  |
| 16               | 6                | 0              | 2.324719                | 4.296857  | 2.649638  |
| 17               | 6                | 0              | 1.237007                | 4.760565  | 1.736758  |
| 18               | 7                | 0              | -4.265764               | 1.983970  | -0.125743 |
| 19               | 8                | 0              | -2.630247               | 3.621615  | -0.413245 |
| 20               | 8                | 0              | -5.754208               | 0.504903  | 0.895986  |
| 21               | 6                | 0              | -3.441931               | 3.050728  | 0.288390  |
| 22               | 6                | 0              | -3.785302               | 3.307006  | 1.714390  |
| 23               | 6                | 0              | -3.275310               | 4.245708  | 2.599615  |
| 24               | 1                | 0              | -2.481794               | 4.924405  | 2.302445  |
| 25               | 6                | 0              | -3.803077               | 4.249193  | 3.897909  |
| 26               | 1                | 0              | -3.431922               | 4.968302  | 4.622844  |
| 27               | 6                | 0              | -4.795599               | 3.337221  | 4.282204  |
| 28               | 1                | 0              | -5.184692               | 3.369137  | 5.296384  |
| 29               | 6                | 0              | -5.287007               | 2.380854  | 3.383022  |
| 30               | 1                | 0              | -6.046689               | 1.661307  | 3.672988  |
| 31               | 6                | 0              | -4.762710               | 2.387579  | 2.097990  |
| 32               | 6                | 0              | -5.036097               | 1.488488  | 0.939375  |
| 33               | 7                | 0              | -2.236380               | -3.898983 | -1.522530 |

|    |   |   |           |           |           |
|----|---|---|-----------|-----------|-----------|
| 34 | 8 | 0 | -3.565443 | -2.012812 | -1.871800 |
| 35 | 8 | 0 | -1.297241 | -5.778566 | -0.506099 |
| 36 | 6 | 0 | -3.316686 | -3.036184 | -1.263786 |
| 37 | 6 | 0 | -4.052808 | -3.626719 | -0.109852 |
| 38 | 6 | 0 | -5.186768 | -3.175369 | 0.552153  |
| 39 | 1 | 0 | -5.673840 | -2.246827 | 0.269689  |
| 40 | 6 | 0 | -5.651391 | -3.952216 | 1.622892  |
| 41 | 1 | 0 | -6.534346 | -3.633057 | 2.169176  |
| 42 | 6 | 0 | -4.993893 | -5.128916 | 2.006335  |
| 43 | 1 | 0 | -5.381447 | -5.707816 | 2.839997  |
| 44 | 6 | 0 | -3.839200 | -5.563113 | 1.340682  |
| 45 | 1 | 0 | -3.314130 | -6.465627 | 1.638152  |
| 46 | 6 | 0 | -3.386704 | -4.789271 | 0.281472  |
| 47 | 6 | 0 | -2.181558 | -4.947525 | -0.583525 |
| 48 | 7 | 0 | 4.612160  | -1.122587 | -0.947220 |
| 49 | 8 | 0 | 3.464587  | -2.885012 | -1.965025 |
| 50 | 8 | 0 | 5.854604  | 0.092144  | 0.615164  |
| 51 | 6 | 0 | 4.254696  | -2.467146 | -1.141854 |
| 52 | 6 | 0 | 5.030570  | -3.245918 | -0.130078 |
| 53 | 6 | 0 | 5.101038  | -4.615151 | 0.083677  |
| 54 | 1 | 0 | 4.541331  | -5.306569 | -0.538877 |
| 55 | 6 | 0 | 5.922704  | -5.062513 | 1.127957  |
| 56 | 1 | 0 | 6.010039  | -6.127671 | 1.323532  |
| 57 | 6 | 0 | 6.638684  | -4.156647 | 1.922934  |
| 58 | 1 | 0 | 7.269889  | -4.533939 | 2.722798  |
| 59 | 6 | 0 | 6.558013  | -2.775564 | 1.697101  |
| 60 | 1 | 0 | 7.110309  | -2.064946 | 2.304299  |
| 61 | 6 | 0 | 5.745400  | -2.345204 | 0.658231  |
| 62 | 6 | 0 | 5.454612  | -0.965676 | 0.166099  |
| 63 | 8 | 0 | 0.415292  | 2.069751  | -0.152519 |
| 64 | 8 | 0 | 0.324676  | 2.609011  | -2.352043 |
| 65 | 8 | 0 | -2.046576 | 0.546948  | -0.483159 |
| 66 | 8 | 0 | -2.073569 | 1.021286  | -2.696375 |
| 67 | 8 | 0 | -0.497636 | -1.881346 | -0.969707 |
| 68 | 8 | 0 | -0.479562 | -1.391543 | -3.183317 |
| 69 | 8 | 0 | 2.017883  | -0.285576 | -0.664021 |
| 70 | 8 | 0 | 1.998660  | 0.283124  | -2.857904 |
| 71 | 6 | 0 | 0.466819  | 2.885620  | -1.129453 |
| 72 | 6 | 0 | 0.664964  | 4.352999  | -0.681561 |
| 73 | 1 | 0 | -0.295378 | 4.613201  | -0.220163 |
| 74 | 6 | 0 | 0.953412  | 5.441699  | -1.764594 |
| 75 | 6 | 0 | 1.153730  | 6.789702  | -1.037523 |
| 76 | 1 | 0 | 1.245251  | 7.595103  | -1.775379 |
| 77 | 1 | 0 | 2.065424  | 6.792209  | -0.430052 |

|     |   |   |           |           |           |
|-----|---|---|-----------|-----------|-----------|
| 78  | 1 | 0 | 0.308697  | 7.024806  | -0.380324 |
| 79  | 6 | 0 | 2.197836  | 5.141492  | -2.620331 |
| 80  | 1 | 0 | 2.094966  | 4.194061  | -3.154393 |
| 81  | 1 | 0 | 3.105742  | 5.089553  | -2.012393 |
| 82  | 1 | 0 | 2.332741  | 5.940995  | -3.359614 |
| 83  | 6 | 0 | -0.288616 | 5.569029  | -2.675187 |
| 84  | 1 | 0 | -0.455268 | 4.659983  | -3.255951 |
| 85  | 1 | 0 | -0.147697 | 6.404087  | -3.372054 |
| 86  | 1 | 0 | -1.193228 | 5.768800  | -2.088353 |
| 87  | 6 | 0 | -2.611787 | 0.932203  | -1.562101 |
| 88  | 6 | 0 | -4.113136 | 1.252392  | -1.389503 |
| 89  | 1 | 0 | -4.570766 | 0.276653  | -1.190056 |
| 90  | 6 | 0 | -4.891388 | 1.867384  | -2.598999 |
| 91  | 6 | 0 | -4.296946 | 3.195368  | -3.104853 |
| 92  | 1 | 0 | -4.317050 | 3.970141  | -2.332885 |
| 93  | 1 | 0 | -4.888062 | 3.554497  | -3.956590 |
| 94  | 1 | 0 | -3.262371 | 3.071450  | -3.431822 |
| 95  | 6 | 0 | -6.349147 | 2.108499  | -2.148507 |
| 96  | 1 | 0 | -6.414239 | 2.883423  | -1.376912 |
| 97  | 1 | 0 | -6.806850 | 1.195502  | -1.750283 |
| 98  | 1 | 0 | -6.947110 | 2.442711  | -3.004186 |
| 99  | 6 | 0 | -4.911137 | 0.833334  | -3.746867 |
| 100 | 1 | 0 | -5.318252 | -0.127981 | -3.411411 |
| 101 | 1 | 0 | -3.910555 | 0.656395  | -4.145085 |
| 102 | 1 | 0 | -5.547342 | 1.203215  | -4.559850 |
| 103 | 6 | 0 | -0.670907 | -2.159085 | -2.205279 |
| 104 | 6 | 0 | -1.128760 | -3.619430 | -2.448780 |
| 105 | 1 | 0 | -0.309997 | -4.239595 | -2.063931 |
| 106 | 6 | 0 | -1.381895 | -4.084146 | -3.920145 |
| 107 | 6 | 0 | -0.046523 | -3.997707 | -4.691938 |
| 108 | 1 | 0 | 0.739266  | -4.580947 | -4.194943 |
| 109 | 1 | 0 | 0.299920  | -2.966760 | -4.785731 |
| 110 | 1 | 0 | -0.177534 | -4.410064 | -5.699400 |
| 111 | 6 | 0 | -1.819959 | -5.564824 | -3.883738 |
| 112 | 1 | 0 | -1.101222 | -6.189861 | -3.341910 |
| 113 | 1 | 0 | -1.900561 | -5.948119 | -4.907359 |
| 114 | 1 | 0 | -2.799409 | -5.686920 | -3.408214 |
| 115 | 6 | 0 | -2.463743 | -3.262502 | -4.646746 |
| 116 | 1 | 0 | -2.195845 | -2.205801 | -4.701211 |
| 117 | 1 | 0 | -3.434970 | -3.341039 | -4.148537 |
| 118 | 1 | 0 | -2.581999 | -3.644367 | -5.668403 |
| 119 | 6 | 0 | 2.577279  | -0.023126 | -1.780033 |
| 120 | 6 | 0 | 4.121709  | 0.013872  | -1.733588 |
| 121 | 1 | 0 | 4.333730  | 0.885283  | -1.102021 |

|     |   |   |           |           |           |
|-----|---|---|-----------|-----------|-----------|
| 122 | 6 | 0 | 4.901148  | 0.237159  | -3.077659 |
| 123 | 6 | 0 | 4.568963  | 1.648676  | -3.612935 |
| 124 | 1 | 0 | 3.522422  | 1.730445  | -3.909982 |
| 125 | 1 | 0 | 5.194187  | 1.862140  | -4.488355 |
| 126 | 1 | 0 | 4.770578  | 2.417399  | -2.858218 |
| 127 | 6 | 0 | 6.414434  | 0.199935  | -2.767060 |
| 128 | 1 | 0 | 6.747031  | -0.797673 | -2.458610 |
| 129 | 1 | 0 | 6.684877  | 0.909102  | -1.976631 |
| 130 | 1 | 0 | 6.977664  | 0.467267  | -3.668350 |
| 131 | 6 | 0 | 4.588292  | -0.816237 | -4.157969 |
| 132 | 1 | 0 | 3.525898  | -0.825744 | -4.410027 |
| 133 | 1 | 0 | 4.870764  | -1.824744 | -3.841661 |
| 134 | 1 | 0 | 5.156451  | -0.581022 | -5.066714 |
| 135 | 6 | 0 | 2.592987  | -2.999980 | 2.504818  |
| 136 | 6 | 0 | 3.002780  | -2.434709 | 3.723646  |
| 137 | 6 | 0 | 2.469896  | -1.232963 | 4.201244  |
| 138 | 6 | 0 | 1.499896  | -0.610415 | 3.423758  |
| 139 | 6 | 0 | 1.073013  | -1.156848 | 2.177931  |
| 140 | 6 | 0 | 1.636283  | -2.361172 | 1.720917  |
| 141 | 7 | 0 | 0.806460  | 0.565854  | 3.657107  |
| 142 | 6 | 0 | -0.052608 | 0.864954  | 2.588465  |
| 143 | 6 | 0 | 0.118949  | -0.274613 | 1.565135  |
| 144 | 8 | 0 | -0.759288 | 1.848539  | 2.535540  |
| 145 | 1 | 0 | 3.039445  | -3.930191 | 2.170159  |
| 146 | 1 | 0 | 3.761911  | -2.942019 | 4.313241  |
| 147 | 1 | 0 | 2.801188  | -0.808746 | 5.144346  |
| 148 | 1 | 0 | 1.320839  | -2.767324 | 0.765259  |
| 149 | 1 | 0 | 0.970241  | 1.211921  | 4.416565  |
| 150 | 6 | 0 | -2.005785 | -1.195333 | 3.316372  |
| 151 | 1 | 0 | -2.432730 | -0.280495 | 3.724808  |
| 152 | 6 | 0 | -1.918486 | -1.292015 | 1.955266  |
| 153 | 1 | 0 | -1.585102 | -2.196576 | 1.459664  |
| 154 | 1 | 0 | -2.402839 | -0.558009 | 1.322926  |
| 155 | 6 | 0 | -1.535838 | -2.156939 | 4.298146  |
| 156 | 6 | 0 | -1.588018 | -1.813556 | 5.666840  |
| 157 | 6 | 0 | -1.018525 | -3.423245 | 3.947736  |
| 158 | 6 | 0 | -1.134992 | -2.691703 | 6.645558  |
| 159 | 1 | 0 | -1.988258 | -0.843007 | 5.950178  |
| 160 | 6 | 0 | -0.561144 | -4.297700 | 4.927847  |
| 161 | 1 | 0 | -0.985603 | -3.724636 | 2.906461  |
| 162 | 6 | 0 | -0.615608 | -3.936884 | 6.278074  |
| 163 | 1 | 0 | -1.184717 | -2.408989 | 7.693526  |
| 164 | 1 | 0 | -0.164650 | -5.267280 | 4.639939  |
| 165 | 1 | 0 | -0.261523 | -4.625702 | 7.040274  |

-----  
**End -on transition state leading to *cis* cyclopropane from Re-face (TS-17c)**

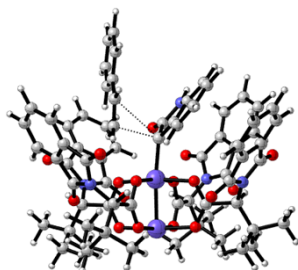

|                                              |                             |
|----------------------------------------------|-----------------------------|
| Zero-point correction=                       | 1.300049 (Hartree/Particle) |
| Thermal correction to Energy=                | 1.390795                    |
| Thermal correction to Enthalpy=              | 1.391739                    |
| Thermal correction to Gibbs Free Energy=     | 1.166864                    |
| Sum of electronic and zero-point Energies=   | -4555.767291                |
| Sum of electronic and thermal Energies=      | -4555.676545                |
| Sum of electronic and thermal Enthalpies=    | -4555.675601                |
| Sum of electronic and thermal Free Energies= | -4555.900475                |

-----

| Center<br>Number | Atomic<br>Number | Atomic<br>Type | Coordinates (Angstroms) |           |           |
|------------------|------------------|----------------|-------------------------|-----------|-----------|
|                  |                  |                | X                       | Y         | Z         |
| 1                | 45               | 0              | -0.129427               | 0.220840  | -0.375592 |
| 2                | 45               | 0              | -0.374499               | 0.534263  | -2.814560 |
| 3                | 7                | 0              | -0.755725               | -4.352593 | -0.948856 |
| 4                | 8                | 0              | -2.791500               | -3.241093 | -1.191945 |
| 5                | 8                | 0              | 1.028680                | -5.514062 | 0.011311  |
| 6                | 6                | 0              | -2.036742               | -3.941712 | -0.544352 |
| 7                | 6                | 0              | -2.254214               | -4.525933 | 0.808921  |
| 8                | 6                | 0              | -3.348555               | -4.424703 | 1.657410  |
| 9                | 1                | 0              | -4.223788               | -3.845585 | 1.376434  |
| 10               | 6                | 0              | -3.256218               | -5.077039 | 2.894971  |
| 11               | 1                | 0              | -4.090059               | -5.026170 | 3.589777  |
| 12               | 6                | 0              | -2.106088               | -5.794969 | 3.253588  |
| 13               | 1                | 0              | -2.069455               | -6.294247 | 4.218271  |
| 14               | 6                | 0              | -1.004426               | -5.878159 | 2.389863  |
| 15               | 1                | 0              | -0.105434               | -6.423146 | 2.661091  |
| 16               | 6                | 0              | -1.104155               | -5.229884 | 1.166949  |
| 17               | 6                | 0              | -0.110167               | -5.091367 | 0.060654  |
| 18               | 7                | 0              | 4.406539                | -0.700128 | -1.168881 |
| 19               | 8                | 0              | 3.011076                | -2.400310 | -1.943442 |
| 20               | 8                | 0              | 5.874190                | 0.513475  | 0.180622  |
| 21               | 6                | 0              | 3.865132                | -1.999269 | -1.177026 |
| 22               | 6                | 0              | 4.559894                | -2.742212 | -0.088142 |

|    |   |   |           |           |           |
|----|---|---|-----------|-----------|-----------|
| 23 | 6 | 0 | 4.411092  | -4.056718 | 0.330665  |
| 24 | 1 | 0 | 3.667257  | -4.708451 | -0.117141 |
| 25 | 6 | 0 | 5.239199  | -4.489815 | 1.375664  |
| 26 | 1 | 0 | 5.157720  | -5.512900 | 1.731755  |
| 27 | 6 | 0 | 6.169302  | -3.626698 | 1.971737  |
| 28 | 1 | 0 | 6.804785  | -3.998053 | 2.771379  |
| 29 | 6 | 0 | 6.289211  | -2.292410 | 1.556769  |
| 30 | 1 | 0 | 6.994707  | -1.610878 | 2.022034  |
| 31 | 6 | 0 | 5.468228  | -1.873281 | 0.519241  |
| 32 | 6 | 0 | 5.330826  | -0.532680 | -0.123797 |
| 33 | 7 | 0 | 1.073538  | 4.734818  | -0.098960 |
| 34 | 8 | 0 | 2.689105  | 3.467914  | -1.208600 |
| 35 | 8 | 0 | -0.060432 | 5.871051  | 1.594552  |
| 36 | 6 | 0 | 2.333015  | 4.129218  | -0.251807 |
| 37 | 6 | 0 | 3.101079  | 4.452039  | 0.984683  |
| 38 | 6 | 0 | 4.390990  | 4.095155  | 1.353694  |
| 39 | 1 | 0 | 5.010927  | 3.477161  | 0.711035  |
| 40 | 6 | 0 | 4.844567  | 4.540731  | 2.602892  |
| 41 | 1 | 0 | 5.846840  | 4.280454  | 2.930849  |
| 42 | 6 | 0 | 4.025407  | 5.310323  | 3.440084  |
| 43 | 1 | 0 | 4.408213  | 5.640372  | 4.401819  |
| 44 | 6 | 0 | 2.719526  | 5.651197  | 3.061824  |
| 45 | 1 | 0 | 2.071846  | 6.235384  | 3.708287  |
| 46 | 6 | 0 | 2.279187  | 5.206522  | 1.823350  |
| 47 | 6 | 0 | 0.950619  | 5.353977  | 1.161185  |
| 48 | 7 | 0 | -4.948620 | 0.414367  | -0.103605 |
| 49 | 8 | 0 | -4.338137 | 2.625002  | -0.547398 |
| 50 | 8 | 0 | -5.676667 | -1.487100 | 1.043417  |
| 51 | 6 | 0 | -4.897318 | 1.796399  | 0.143446  |
| 52 | 6 | 0 | -5.651856 | 2.011442  | 1.414710  |
| 53 | 6 | 0 | -5.958950 | 3.186658  | 2.085447  |
| 54 | 1 | 0 | -5.645310 | 4.150101  | 1.695208  |
| 55 | 6 | 0 | -6.687928 | 3.076191  | 3.277935  |
| 56 | 1 | 0 | -6.953144 | 3.973625  | 3.829922  |
| 57 | 6 | 0 | -7.084745 | 1.824579  | 3.769089  |
| 58 | 1 | 0 | -7.651899 | 1.771294  | 4.694333  |
| 59 | 6 | 0 | -6.767016 | 0.644587  | 3.082406  |
| 60 | 1 | 0 | -7.070684 | -0.330044 | 3.451968  |
| 61 | 6 | 0 | -6.049535 | 0.766912  | 1.901258  |
| 62 | 6 | 0 | -5.566976 | -0.278780 | 0.951012  |
| 63 | 8 | 0 | -0.117728 | -1.801352 | -0.776452 |
| 64 | 8 | 0 | -0.272370 | -1.533519 | -3.021597 |
| 65 | 8 | 0 | 1.920222  | 0.276434  | -0.707851 |
| 66 | 8 | 0 | 1.694845  | 0.610508  | -2.936550 |



|     |   |   |           |           |           |
|-----|---|---|-----------|-----------|-----------|
| 67  | 8 | 0 | -0.120147 | 2.294175  | -0.188277 |
| 68  | 8 | 0 | -0.402825 | 2.587440  | -2.417840 |
| 69  | 8 | 0 | -2.223391 | 0.157662  | -0.311076 |
| 70  | 8 | 0 | -2.417206 | 0.351421  | -2.558982 |
| 71  | 6 | 0 | -0.168963 | -2.230114 | -1.975560 |
| 72  | 6 | 0 | -0.020147 | -3.766701 | -2.078305 |
| 73  | 1 | 0 | 1.032932  | -3.940377 | -1.827844 |
| 74  | 6 | 0 | -0.272547 | -4.460113 | -3.456474 |
| 75  | 6 | 0 | -0.106126 | -5.982463 | -3.256624 |
| 76  | 1 | 0 | -0.172284 | -6.489847 | -4.226015 |
| 77  | 1 | 0 | -0.889999 | -6.395686 | -2.612482 |
| 78  | 1 | 0 | 0.863750  | -6.229362 | -2.809729 |
| 79  | 6 | 0 | -1.670391 | -4.180576 | -4.039303 |
| 80  | 1 | 0 | -1.832886 | -3.111110 | -4.191049 |
| 81  | 1 | 0 | -2.464632 | -4.554112 | -3.386317 |
| 82  | 1 | 0 | -1.767052 | -4.684707 | -5.009001 |
| 83  | 6 | 0 | 0.811605  | -3.986334 | -4.450157 |
| 84  | 1 | 0 | 0.717604  | -2.921101 | -4.667934 |
| 85  | 1 | 0 | 0.713876  | -4.542538 | -5.390276 |
| 86  | 1 | 0 | 1.818757  | -4.164704 | -4.055130 |
| 87  | 6 | 0 | 2.372836  | 0.427293  | -1.892331 |
| 88  | 6 | 0 | 3.916260  | 0.422242  | -1.978741 |
| 89  | 1 | 0 | 4.220947  | 1.313309  | -1.418528 |
| 90  | 6 | 0 | 4.580846  | 0.531767  | -3.392045 |
| 91  | 6 | 0 | 4.176658  | -0.605711 | -4.349563 |
| 92  | 1 | 0 | 4.480602  | -1.585453 | -3.968166 |
| 93  | 1 | 0 | 4.672512  | -0.456616 | -5.316832 |
| 94  | 1 | 0 | 3.097734  | -0.626920 | -4.514316 |
| 95  | 6 | 0 | 6.113957  | 0.500413  | -3.202538 |
| 96  | 1 | 0 | 6.460152  | -0.470109 | -2.830164 |
| 97  | 1 | 0 | 6.453796  | 1.272043  | -2.502779 |
| 98  | 1 | 0 | 6.604434  | 0.675703  | -4.166912 |
| 99  | 6 | 0 | 4.208108  | 1.897389  | -4.011035 |
| 100 | 1 | 0 | 4.476123  | 2.724006  | -3.342777 |
| 101 | 1 | 0 | 3.139776  | 1.966411  | -4.221629 |
| 102 | 1 | 0 | 4.756191  | 2.032239  | -4.951324 |
| 103 | 6 | 0 | -0.205966 | 3.004945  | -1.248111 |
| 104 | 6 | 0 | -0.084009 | 4.526628  | -0.981498 |
| 105 | 1 | 0 | -0.940338 | 4.769966  | -0.340686 |
| 106 | 6 | 0 | -0.153272 | 5.503004  | -2.200992 |
| 107 | 6 | 0 | -1.549665 | 5.371638  | -2.848668 |
| 108 | 1 | 0 | -2.347321 | 5.557219  | -2.118048 |
| 109 | 1 | 0 | -1.703698 | 4.380369  | -3.279020 |
| 110 | 1 | 0 | -1.653981 | 6.114129  | -3.648598 |

|     |   |   |           |           |           |
|-----|---|---|-----------|-----------|-----------|
| 111 | 6 | 0 | -0.006848 | 6.944848  | -1.666713 |
| 112 | 1 | 0 | -0.743528 | 7.167656  | -0.886577 |
| 113 | 1 | 0 | -0.155627 | 7.655683  | -2.487505 |
| 114 | 1 | 0 | 0.990664  | 7.125816  | -1.251326 |
| 115 | 6 | 0 | 0.940400  | 5.249017  | -3.256067 |
| 116 | 1 | 0 | 0.873725  | 4.240176  | -3.667429 |
| 117 | 1 | 0 | 1.943892  | 5.380085  | -2.840003 |
| 118 | 1 | 0 | 0.823036  | 5.967466  | -4.076741 |
| 119 | 6 | 0 | -2.879729 | 0.146042  | -1.404125 |
| 120 | 6 | 0 | -4.361663 | -0.268852 | -1.260303 |
| 121 | 1 | 0 | -4.298964 | -1.317248 | -0.944434 |
| 122 | 6 | 0 | -5.267975 | -0.242594 | -2.541121 |
| 123 | 6 | 0 | -4.737821 | -1.293774 | -3.542221 |
| 124 | 1 | 0 | -3.750638 | -1.026170 | -3.922065 |
| 125 | 1 | 0 | -5.426785 | -1.366694 | -4.392462 |
| 126 | 1 | 0 | -4.667338 | -2.284063 | -3.078205 |
| 127 | 6 | 0 | -6.695018 | -0.667810 | -2.128218 |
| 128 | 1 | 0 | -7.171235 | 0.071851  | -1.474590 |
| 129 | 1 | 0 | -6.698174 | -1.633106 | -1.609584 |
| 130 | 1 | 0 | -7.320229 | -0.762754 | -3.023348 |
| 131 | 6 | 0 | -5.339111 | 1.137605  | -3.223183 |
| 132 | 1 | 0 | -4.350182 | 1.482108  | -3.532311 |
| 133 | 1 | 0 | -5.772994 | 1.897538  | -2.566504 |
| 134 | 1 | 0 | -5.974095 | 1.066456  | -4.115095 |
| 135 | 6 | 0 | -2.839995 | 1.594942  | 3.602108  |
| 136 | 6 | 0 | -3.051360 | 0.567718  | 4.533987  |
| 137 | 6 | 0 | -2.321844 | -0.627931 | 4.498603  |
| 138 | 6 | 0 | -1.357367 | -0.757733 | 3.507878  |
| 139 | 6 | 0 | -1.127923 | 0.268318  | 2.548226  |
| 140 | 6 | 0 | -1.890338 | 1.443906  | 2.592632  |
| 141 | 7 | 0 | -0.481502 | -1.806664 | 3.259216  |
| 142 | 6 | 0 | 0.371726  | -1.507490 | 2.195743  |
| 143 | 6 | 0 | -0.092723 | -0.153786 | 1.635913  |
| 144 | 8 | 0 | 1.289935  | -2.214398 | 1.829668  |
| 145 | 1 | 0 | -3.432268 | 2.501745  | 3.660960  |
| 146 | 1 | 0 | -3.807952 | 0.697435  | 5.303294  |
| 147 | 1 | 0 | -2.503158 | -1.415799 | 5.223740  |
| 148 | 1 | 0 | -1.720742 | 2.218086  | 1.851719  |
| 149 | 1 | 0 | -0.387577 | -2.649715 | 3.808056  |
| 150 | 6 | 0 | 1.839874  | 0.892683  | 3.591046  |
| 151 | 1 | 0 | 1.233666  | 1.619441  | 4.131726  |
| 152 | 6 | 0 | 1.850035  | 0.986203  | 2.228073  |
| 153 | 1 | 0 | 2.459906  | 0.354869  | 1.593338  |
| 154 | 1 | 0 | 1.415773  | 1.854741  | 1.747851  |

|     |   |   |          |           |          |
|-----|---|---|----------|-----------|----------|
| 155 | 6 | 0 | 2.502995 | -0.084881 | 4.437066 |
| 156 | 6 | 0 | 2.301437 | -0.010175 | 5.833265 |
| 157 | 6 | 0 | 3.341069 | -1.105155 | 3.935204 |
| 158 | 6 | 0 | 2.908072 | -0.916310 | 6.696454 |
| 159 | 1 | 0 | 1.659649 | 0.772229  | 6.231602 |
| 160 | 6 | 0 | 3.939253 | -2.014330 | 4.801636 |
| 161 | 1 | 0 | 3.513515 | -1.190626 | 2.869104 |
| 162 | 6 | 0 | 3.728717 | -1.924516 | 6.181438 |
| 163 | 1 | 0 | 2.742766 | -0.839754 | 7.767668 |
| 164 | 1 | 0 | 4.574089 | -2.795802 | 4.395100 |
| 165 | 1 | 0 | 4.204541 | -2.634891 | 6.852297 |

**End-on transition state leading to *cis* cyclopropane from Si-face (TS-17d)**

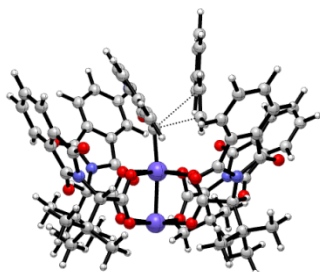

|                                              |                             |
|----------------------------------------------|-----------------------------|
| Zero-point correction=                       | 1.300958 (Hartree/Particle) |
| Thermal correction to Energy=                | 1.391197                    |
| Thermal correction to Enthalpy=              | 1.392142                    |
| Thermal correction to Gibbs Free Energy=     | 1.169178                    |
| Sum of electronic and zero-point Energies=   | -4555.771329                |
| Sum of electronic and thermal Energies=      | -4555.681090                |
| Sum of electronic and thermal Enthalpies=    | -4555.680145                |
| Sum of electronic and thermal Free Energies= | -4555.903109                |

| Center Number | Atomic Number | Atomic Type | Coordinates (Angstroms) |           |           |
|---------------|---------------|-------------|-------------------------|-----------|-----------|
|               |               |             | X                       | Y         | Z         |
| 1             | 45            | 0           | -0.167458               | -0.288323 | -0.332147 |
| 2             | 45            | 0           | -0.427647               | -0.674197 | -2.760676 |
| 3             | 7             | 0           | 3.390624                | 2.665760  | -1.459130 |
| 4             | 8             | 0           | 3.971077                | 0.475474  | -2.010786 |
| 5             | 8             | 0           | 3.236617                | 4.681842  | -0.292569 |
| 6             | 6             | 0           | 4.153056                | 1.487749  | -1.360791 |
| 7             | 6             | 0           | 5.177805                | 1.744966  | -0.309238 |
| 8             | 6             | 0           | 6.184960                | 0.922124  | 0.175532  |
| 9             | 1             | 0           | 6.309018                | -0.090547 | -0.194016 |
| 10            | 6             | 0           | 7.005170                | 1.447080  | 1.184374  |

|    |   |   |           |           |           |
|----|---|---|-----------|-----------|-----------|
| 11 | 1 | 0 | 7.806262  | 0.836709  | 1.591798  |
| 12 | 6 | 0 | 6.806380  | 2.741266  | 1.683464  |
| 13 | 1 | 0 | 7.458696  | 3.116187  | 2.467303  |
| 14 | 6 | 0 | 5.773716  | 3.554462  | 1.196769  |
| 15 | 1 | 0 | 5.598738  | 4.550957  | 1.589631  |
| 16 | 6 | 0 | 4.971241  | 3.030739  | 0.193523  |
| 17 | 6 | 0 | 3.788527  | 3.617246  | -0.501345 |
| 18 | 7 | 0 | -3.282933 | 3.200630  | -0.669100 |
| 19 | 8 | 0 | -1.236955 | 3.894411  | -1.555972 |
| 20 | 8 | 0 | -5.046647 | 2.884674  | 0.827463  |
| 21 | 6 | 0 | -2.110616 | 3.979377  | -0.715210 |
| 22 | 6 | 0 | -2.190215 | 4.905124  | 0.451109  |
| 23 | 6 | 0 | -1.328147 | 5.914462  | 0.851633  |
| 24 | 1 | 0 | -0.421358 | 6.126765  | 0.293861  |
| 25 | 6 | 0 | -1.672887 | 6.635093  | 2.002955  |
| 26 | 1 | 0 | -1.024903 | 7.435838  | 2.348458  |
| 27 | 6 | 0 | -2.840569 | 6.340089  | 2.719330  |
| 28 | 1 | 0 | -3.081472 | 6.918545  | 3.607070  |
| 29 | 6 | 0 | -3.700251 | 5.312804  | 2.307869  |
| 30 | 1 | 0 | -4.607586 | 5.074961  | 2.854905  |
| 31 | 6 | 0 | -3.350967 | 4.608650  | 1.164640  |
| 32 | 6 | 0 | -4.037943 | 3.474693  | 0.481876  |
| 33 | 7 | 0 | -3.919937 | -3.016718 | 0.275583  |
| 34 | 8 | 0 | -4.457838 | -0.991510 | -0.746697 |
| 35 | 8 | 0 | -3.613675 | -4.655379 | 1.909180  |
| 36 | 6 | 0 | -4.498870 | -1.737647 | 0.213199  |
| 37 | 6 | 0 | -5.148101 | -1.510247 | 1.535059  |
| 38 | 6 | 0 | -5.856251 | -0.412079 | 2.004657  |
| 39 | 1 | 0 | -5.987451 | 0.477615  | 1.396044  |
| 40 | 6 | 0 | -6.362322 | -0.492098 | 3.309795  |
| 41 | 1 | 0 | -6.923456 | 0.344846  | 3.715955  |
| 42 | 6 | 0 | -6.155280 | -1.630020 | 4.101349  |
| 43 | 1 | 0 | -6.565902 | -1.660995 | 5.106996  |
| 44 | 6 | 0 | -5.421627 | -2.723098 | 3.620149  |
| 45 | 1 | 0 | -5.244081 | -3.604407 | 4.228719  |
| 46 | 6 | 0 | -4.925117 | -2.636888 | 2.327639  |
| 47 | 6 | 0 | -4.086796 | -3.594886 | 1.549625  |
| 48 | 7 | 0 | 3.416921  | -3.410349 | -0.208910 |
| 49 | 8 | 0 | 1.418342  | -4.584331 | 0.106145  |
| 50 | 8 | 0 | 5.480783  | -2.404270 | 0.219392  |
| 51 | 6 | 0 | 2.508941  | -4.216936 | 0.498470  |
| 52 | 6 | 0 | 3.158006  | -4.510641 | 1.811205  |
| 53 | 6 | 0 | 2.717938  | -5.287091 | 2.873482  |
| 54 | 1 | 0 | 1.761185  | -5.798470 | 2.832004  |

|    |   |   |           |           |           |
|----|---|---|-----------|-----------|-----------|
| 55 | 6 | 0 | 3.558163  | -5.385072 | 3.991052  |
| 56 | 1 | 0 | 3.250186  | -5.985360 | 4.842544  |
| 57 | 6 | 0 | 4.792671  | -4.722776 | 4.028466  |
| 58 | 1 | 0 | 5.422219  | -4.819489 | 4.908549  |
| 59 | 6 | 0 | 5.226950  | -3.941622 | 2.948968  |
| 60 | 1 | 0 | 6.181689  | -3.425179 | 2.965815  |
| 61 | 6 | 0 | 4.387382  | -3.853467 | 1.847775  |
| 62 | 6 | 0 | 4.556132  | -3.118241 | 0.561006  |
| 63 | 8 | 0 | 1.107518  | 1.278880  | -0.829402 |
| 64 | 8 | 0 | 0.819880  | 0.958196  | -3.053130 |
| 65 | 8 | 0 | -1.804432 | 0.969078  | -0.495700 |
| 66 | 8 | 0 | -2.045161 | 0.620313  | -2.722867 |
| 67 | 8 | 0 | -1.479330 | -1.884409 | -0.083905 |
| 68 | 8 | 0 | -1.704866 | -2.252114 | -2.306657 |
| 69 | 8 | 0 | 1.484646  | -1.564272 | -0.396672 |
| 70 | 8 | 0 | 1.233033  | -1.920878 | -2.618799 |
| 71 | 6 | 0 | 1.299486  | 1.563542  | -2.058836 |
| 72 | 6 | 0 | 2.177029  | 2.819287  | -2.273956 |
| 73 | 1 | 0 | 1.619827  | 3.622179  | -1.776901 |
| 74 | 6 | 0 | 2.445853  | 3.296019  | -3.739246 |
| 75 | 6 | 0 | 3.312036  | 4.573536  | -3.673304 |
| 76 | 1 | 0 | 3.437873  | 4.981339  | -4.682786 |
| 77 | 1 | 0 | 4.312007  | 4.367892  | -3.275087 |
| 78 | 1 | 0 | 2.851365  | 5.346725  | -3.048400 |
| 79 | 6 | 0 | 3.173591  | 2.247564  | -4.601997 |
| 80 | 1 | 0 | 2.597279  | 1.323853  | -4.681018 |
| 81 | 1 | 0 | 4.159343  | 2.000015  | -4.195190 |
| 82 | 1 | 0 | 3.323279  | 2.651066  | -5.611204 |
| 83 | 6 | 0 | 1.094660  | 3.668132  | -4.389323 |
| 84 | 1 | 0 | 0.459894  | 2.791057  | -4.526830 |
| 85 | 1 | 0 | 1.274896  | 4.121568  | -5.371457 |
| 86 | 1 | 0 | 0.543841  | 4.392787  | -3.778296 |
| 87 | 6 | 0 | -2.365068 | 1.152559  | -1.625503 |
| 88 | 6 | 0 | -3.596663 | 2.081439  | -1.563635 |
| 89 | 1 | 0 | -4.335562 | 1.494100  | -1.006799 |
| 90 | 6 | 0 | -4.282886 | 2.503412  | -2.907024 |
| 91 | 6 | 0 | -3.332982 | 3.214376  | -3.889863 |
| 92 | 1 | 0 | -2.933566 | 4.142896  | -3.471638 |
| 93 | 1 | 0 | -3.883523 | 3.468467  | -4.804390 |
| 94 | 1 | 0 | -2.489271 | 2.577057  | -4.163215 |
| 95 | 6 | 0 | -5.452036 | 3.454095  | -2.566573 |
| 96 | 1 | 0 | -5.098374 | 4.406224  | -2.155556 |
| 97 | 1 | 0 | -6.141296 | 3.006844  | -1.841239 |
| 98 | 1 | 0 | -6.017934 | 3.678981  | -3.477786 |

|     |   |   |           |           |           |
|-----|---|---|-----------|-----------|-----------|
| 99  | 6 | 0 | -4.876801 | 1.242605  | -3.575059 |
| 100 | 1 | 0 | -5.551845 | 0.712088  | -2.893285 |
| 101 | 1 | 0 | -4.096025 | 0.547057  | -3.886873 |
| 102 | 1 | 0 | -5.453367 | 1.535944  | -4.460719 |
| 103 | 6 | 0 | -1.983087 | -2.469653 | -1.098358 |
| 104 | 6 | 0 | -3.002555 | -3.576193 | -0.726431 |
| 105 | 1 | 0 | -2.422014 | -4.314852 | -0.160337 |
| 106 | 6 | 0 | -3.704722 | -4.356371 | -1.885103 |
| 107 | 6 | 0 | -2.624302 | -5.120590 | -2.682568 |
| 108 | 1 | 0 | -2.037738 | -5.778163 | -2.028054 |
| 109 | 1 | 0 | -1.938711 | -4.438923 | -3.189540 |
| 110 | 1 | 0 | -3.104526 | -5.751110 | -3.440059 |
| 111 | 6 | 0 | -4.655654 | -5.396653 | -1.253187 |
| 112 | 1 | 0 | -4.134134 | -6.046473 | -0.541411 |
| 113 | 1 | 0 | -5.083262 | -6.027419 | -2.040924 |
| 114 | 1 | 0 | -5.488664 | -4.919270 | -0.725514 |
| 115 | 6 | 0 | -4.514006 | -3.450190 | -2.832274 |
| 116 | 1 | 0 | -3.880992 | -2.694072 | -3.300249 |
| 117 | 1 | 0 | -5.323883 | -2.935676 | -2.306072 |
| 118 | 1 | 0 | -4.965648 | -4.064001 | -3.621507 |
| 119 | 6 | 0 | 1.835195  | -2.057412 | -1.520383 |
| 120 | 6 | 0 | 3.187930  | -2.803929 | -1.525059 |
| 121 | 1 | 0 | 3.926301  | -1.993220 | -1.572042 |
| 122 | 6 | 0 | 3.494063  | -3.757646 | -2.736195 |
| 123 | 6 | 0 | 3.709215  | -2.896416 | -4.001631 |
| 124 | 1 | 0 | 2.798627  | -2.369769 | -4.290247 |
| 125 | 1 | 0 | 4.016291  | -3.541322 | -4.833853 |
| 126 | 1 | 0 | 4.499291  | -2.151940 | -3.844708 |
| 127 | 6 | 0 | 4.816936  | -4.500854 | -2.446576 |
| 128 | 1 | 0 | 4.719820  | -5.205156 | -1.612808 |
| 129 | 1 | 0 | 5.630305  | -3.804736 | -2.212476 |
| 130 | 1 | 0 | 5.110456  | -5.078442 | -3.330379 |
| 131 | 6 | 0 | 2.382335  | -4.792996 | -2.992677 |
| 132 | 1 | 0 | 1.433174  | -4.307166 | -3.230980 |
| 133 | 1 | 0 | 2.222326  | -5.442439 | -2.127340 |
| 134 | 1 | 0 | 2.665056  | -5.426195 | -3.842770 |
| 135 | 6 | 0 | -0.920749 | -3.154835 | 3.699459  |
| 136 | 6 | 0 | -1.553078 | -2.513933 | 4.776331  |
| 137 | 6 | 0 | -1.700321 | -1.122342 | 4.829476  |
| 138 | 6 | 0 | -1.190073 | -0.385645 | 3.767684  |
| 139 | 6 | 0 | -0.536882 | -1.010246 | 2.664922  |
| 140 | 6 | 0 | -0.412135 | -2.409684 | 2.638183  |
| 141 | 7 | 0 | -1.207138 | 0.984635  | 3.558603  |
| 142 | 6 | 0 | -0.640051 | 1.310052  | 2.321299  |

|     |   |   |           |           |          |
|-----|---|---|-----------|-----------|----------|
| 143 | 6 | 0 | -0.168192 | -0.010026 | 1.695301 |
| 144 | 8 | 0 | -0.572857 | 2.437139  | 1.874866 |
| 145 | 1 | 0 | -0.852639 | -4.237502 | 3.684358 |
| 146 | 1 | 0 | -1.950370 | -3.113487 | 5.591341 |
| 147 | 1 | 0 | -2.202914 | -0.644205 | 5.665074 |
| 148 | 1 | 0 | 0.060933  | -2.893105 | 1.791029 |
| 149 | 1 | 0 | -1.646824 | 1.674961  | 4.150758 |
| 150 | 6 | 0 | 2.175018  | 0.868775  | 3.299885 |
| 151 | 1 | 0 | 2.197643  | 0.143286  | 4.113429 |
| 152 | 6 | 0 | 2.098292  | 0.387339  | 2.022121 |
| 153 | 1 | 0 | 2.145011  | 1.038788  | 1.157826 |
| 154 | 1 | 0 | 2.239845  | -0.667613 | 1.822304 |
| 155 | 6 | 0 | 2.234278  | 2.259510  | 3.714919 |
| 156 | 6 | 0 | 2.401540  | 2.554262  | 5.086013 |
| 157 | 6 | 0 | 2.158725  | 3.335354  | 2.802692 |
| 158 | 6 | 0 | 2.506482  | 3.868322  | 5.528410 |
| 159 | 1 | 0 | 2.458775  | 1.735064  | 5.799403 |
| 160 | 6 | 0 | 2.266603  | 4.648865  | 3.248425 |
| 161 | 1 | 0 | 1.997718  | 3.145502  | 1.749114 |
| 162 | 6 | 0 | 2.442936  | 4.920958  | 4.608443 |
| 163 | 1 | 0 | 2.640479  | 4.075533  | 6.586720 |
| 164 | 1 | 0 | 2.219105  | 5.456606  | 2.524326 |
| 165 | 1 | 0 | 2.530177  | 5.948376  | 4.952102 |

-----

**Side -on transition state leading to *trans* cyclopropane from Si-face (TS-17e)**

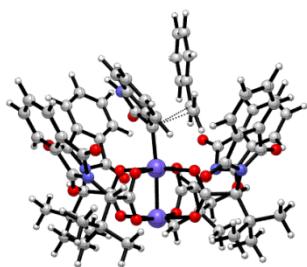

|                                              |                             |
|----------------------------------------------|-----------------------------|
| Zero-point correction=                       | 1.301108 (Hartree/Particle) |
| Thermal correction to Energy=                | 1.391396                    |
| Thermal correction to Enthalpy=              | 1.392340                    |
| Thermal correction to Gibbs Free Energy=     | 1.168890                    |
| Sum of electronic and zero-point Energies=   | -4555.767218                |
| Sum of electronic and thermal Energies=      | -4555.676930                |
| Sum of electronic and thermal Enthalpies=    | -4555.675986                |
| Sum of electronic and thermal Free Energies= | -4555.899437                |

-----

| Center | Atomic | Atomic | Coordinates (Angstroms) |
|--------|--------|--------|-------------------------|
|--------|--------|--------|-------------------------|

| Number<br>Z | Number | Type | X         | Y         |           |
|-------------|--------|------|-----------|-----------|-----------|
| 1           | 45     | 0    | -0.157651 | -0.278639 | -0.331552 |
| 2           | 45     | 0    | -0.379508 | -0.643683 | -2.769165 |
| 3           | 7      | 0    | 3.318697  | 2.807785  | -1.376448 |
| 4           | 8      | 0    | 3.985506  | 0.647688  | -1.948021 |
| 5           | 8      | 0    | 3.076877  | 4.798566  | -0.180700 |
| 6           | 6      | 0    | 4.123535  | 1.657894  | -1.284475 |
| 7           | 6      | 0    | 5.129135  | 1.939209  | -0.220627 |
| 8           | 6      | 0    | 6.158644  | 1.146680  | 0.267443  |
| 9           | 1      | 0    | 6.320572  | 0.141828  | -0.108811 |
| 10          | 6      | 0    | 6.950274  | 1.689877  | 1.289614  |
| 11          | 1      | 0    | 7.767260  | 1.103176  | 1.700111  |
| 12          | 6      | 0    | 6.703004  | 2.972155  | 1.797568  |
| 13          | 1      | 0    | 7.335001  | 3.362302  | 2.590543  |
| 14          | 6      | 0    | 5.647679  | 3.753998  | 1.307561  |
| 15          | 1      | 0    | 5.437007  | 4.741898  | 1.705103  |
| 16          | 6      | 0    | 4.873050  | 3.211915  | 0.292197  |
| 17          | 6      | 0    | 3.673253  | 3.760771  | -0.404897 |
| 18          | 7      | 0    | -3.335717 | 3.142845  | -0.661302 |
| 19          | 8      | 0    | -1.299479 | 3.878116  | -1.536701 |
| 20          | 8      | 0    | -5.094927 | 2.783984  | 0.831101  |
| 21          | 6      | 0    | -2.178549 | 3.943323  | -0.699520 |
| 22          | 6      | 0    | -2.280166 | 4.864008  | 0.468871  |
| 23          | 6      | 0    | -1.439450 | 5.889046  | 0.874502  |
| 24          | 1      | 0    | -0.535458 | 6.121336  | 0.319993  |
| 25          | 6      | 0    | -1.801563 | 6.599137  | 2.027139  |
| 26          | 1      | 0    | -1.171193 | 7.412522  | 2.376007  |
| 27          | 6      | 0    | -2.965094 | 6.278730  | 2.739295  |
| 28          | 1      | 0    | -3.220366 | 6.849720  | 3.627891  |
| 29          | 6      | 0    | -3.802864 | 5.235587  | 2.322323  |
| 30          | 1      | 0    | -4.706692 | 4.977996  | 2.866248  |
| 31          | 6      | 0    | -3.436490 | 4.541988  | 1.178087  |
| 32          | 6      | 0    | -4.098127 | 3.396134  | 0.489669  |
| 33          | 7      | 0    | -3.847450 | -3.104820 | 0.202820  |
| 34          | 8      | 0    | -4.417246 | -1.077083 | -0.797989 |
| 35          | 8      | 0    | -3.540705 | -4.766165 | 1.813691  |
| 36          | 6      | 0    | -4.455400 | -1.839181 | 0.149383  |
| 37          | 6      | 0    | -5.133786 | -1.647983 | 1.462600  |
| 38          | 6      | 0    | -5.876611 | -0.574497 | 1.935729  |
| 39          | 1      | 0    | -6.015822 | 0.322259  | 1.339338  |
| 40          | 6      | 0    | -6.408089 | -0.688685 | 3.228143  |
| 41          | 1      | 0    | -6.996954 | 0.127985  | 3.636385  |



|    |   |   |           |           |           |
|----|---|---|-----------|-----------|-----------|
| 42 | 6 | 0 | -6.192434 | -1.835866 | 4.003994  |
| 43 | 1 | 0 | -6.624135 | -1.894261 | 4.999573  |
| 44 | 6 | 0 | -5.424289 | -2.903595 | 3.519707  |
| 45 | 1 | 0 | -5.240465 | -3.791857 | 4.116206  |
| 46 | 6 | 0 | -4.902136 | -2.783100 | 2.240089  |
| 47 | 6 | 0 | -4.027694 | -3.709165 | 1.462810  |
| 48 | 7 | 0 | 3.538656  | -3.300940 | -0.249718 |
| 49 | 8 | 0 | 1.589234  | -4.580866 | -0.079408 |
| 50 | 8 | 0 | 5.520812  | -2.207460 | 0.326255  |
| 51 | 6 | 0 | 2.648637  | -4.193485 | 0.372988  |
| 52 | 6 | 0 | 3.268575  | -4.540839 | 1.686658  |
| 53 | 6 | 0 | 2.833966  | -5.405655 | 2.680756  |
| 54 | 1 | 0 | 1.908280  | -5.962133 | 2.570479  |
| 55 | 6 | 0 | 3.638433  | -5.531294 | 3.821599  |
| 56 | 1 | 0 | 3.333886  | -6.200330 | 4.621517  |
| 57 | 6 | 0 | 4.832766  | -4.809092 | 3.947917  |
| 58 | 1 | 0 | 5.435168  | -4.929185 | 4.843980  |
| 59 | 6 | 0 | 5.261544  | -3.938372 | 2.936881  |
| 60 | 1 | 0 | 6.185172  | -3.374421 | 3.023155  |
| 61 | 6 | 0 | 4.457922  | -3.823663 | 1.811511  |
| 62 | 6 | 0 | 4.629454  | -2.996198 | 0.582158  |
| 63 | 8 | 0 | 1.083509  | 1.329490  | -0.791122 |
| 64 | 8 | 0 | 0.821776  | 1.034374  | -3.022745 |
| 65 | 8 | 0 | -1.822758 | 0.934241  | -0.492954 |
| 66 | 8 | 0 | -2.035494 | 0.604516  | -2.726045 |
| 67 | 8 | 0 | -1.427041 | -1.912328 | -0.110203 |
| 68 | 8 | 0 | -1.613120 | -2.264094 | -2.340111 |
| 69 | 8 | 0 | 1.540350  | -1.503385 | -0.402469 |
| 70 | 8 | 0 | 1.321081  | -1.838377 | -2.630479 |
| 71 | 6 | 0 | 1.273257  | 1.638487  | -2.014676 |
| 72 | 6 | 0 | 2.109700  | 2.927061  | -2.205372 |
| 73 | 1 | 0 | 1.518249  | 3.704270  | -1.707354 |
| 74 | 6 | 0 | 2.382533  | 3.429569  | -3.661422 |
| 75 | 6 | 0 | 3.204238  | 4.734585  | -3.570029 |
| 76 | 1 | 0 | 3.326793  | 5.159490  | -4.572790 |
| 77 | 1 | 0 | 4.206707  | 4.558452  | -3.163755 |
| 78 | 1 | 0 | 2.710647  | 5.483862  | -2.940969 |
| 79 | 6 | 0 | 3.155630  | 2.415315  | -4.525495 |
| 80 | 1 | 0 | 2.611459  | 1.473759  | -4.619632 |
| 81 | 1 | 0 | 4.144611  | 2.197164  | -4.109628 |
| 82 | 1 | 0 | 3.303100  | 2.833548  | -5.528996 |
| 83 | 6 | 0 | 1.028664  | 3.764321  | -4.326224 |
| 84 | 1 | 0 | 0.423872  | 2.868892  | -4.478973 |
| 85 | 1 | 0 | 1.207430  | 4.231579  | -5.302147 |

|     |   |   |           |           |           |
|-----|---|---|-----------|-----------|-----------|
| 86  | 1 | 0 | 0.447442  | 4.465695  | -3.716512 |
| 87  | 6 | 0 | -2.376417 | 1.117597  | -1.625982 |
| 88  | 6 | 0 | -3.625828 | 2.022820  | -1.563478 |
| 89  | 1 | 0 | -4.355747 | 1.419149  | -1.012553 |
| 90  | 6 | 0 | -4.314856 | 2.440560  | -2.906444 |
| 91  | 6 | 0 | -3.375466 | 3.177008  | -3.880685 |
| 92  | 1 | 0 | -2.996396 | 4.110566  | -3.454768 |
| 93  | 1 | 0 | -3.927419 | 3.426285  | -4.795729 |
| 94  | 1 | 0 | -2.518213 | 2.558373  | -4.154664 |
| 95  | 6 | 0 | -5.504416 | 3.365148  | -2.564908 |
| 96  | 1 | 0 | -5.172022 | 4.321683  | -2.146325 |
| 97  | 1 | 0 | -6.187211 | 2.899235  | -1.845243 |
| 98  | 1 | 0 | -6.071288 | 3.584376  | -3.476924 |
| 99  | 6 | 0 | -4.880073 | 1.172598  | -3.585489 |
| 100 | 1 | 0 | -5.549644 | 0.625530  | -2.911449 |
| 101 | 1 | 0 | -4.084124 | 0.493551  | -3.895380 |
| 102 | 1 | 0 | -5.455755 | 1.459913  | -4.473710 |
| 103 | 6 | 0 | -1.902802 | -2.498509 | -1.137300 |
| 104 | 6 | 0 | -2.903734 | -3.631209 | -0.793021 |
| 105 | 1 | 0 | -2.316342 | -4.365217 | -0.228060 |
| 106 | 6 | 0 | -3.574085 | -4.410491 | -1.971555 |
| 107 | 6 | 0 | -2.467990 | -5.147166 | -2.759443 |
| 108 | 1 | 0 | -1.884740 | -5.806416 | -2.103668 |
| 109 | 1 | 0 | -1.782652 | -4.448277 | -3.242692 |
| 110 | 1 | 0 | -2.924629 | -5.772522 | -3.535582 |
| 111 | 6 | 0 | -4.517229 | -5.474195 | -1.367409 |
| 112 | 1 | 0 | -3.997550 | -6.119686 | -0.650474 |
| 113 | 1 | 0 | -4.916642 | -6.106368 | -2.168773 |
| 114 | 1 | 0 | -5.370050 | -5.017634 | -0.853001 |
| 115 | 6 | 0 | -4.383529 | -3.508044 | -2.922135 |
| 116 | 1 | 0 | -3.754258 | -2.741717 | -3.378341 |
| 117 | 1 | 0 | -5.204928 | -3.006217 | -2.401754 |
| 118 | 1 | 0 | -4.819127 | -4.122301 | -3.720064 |
| 119 | 6 | 0 | 1.924695  | -1.959571 | -1.532728 |
| 120 | 6 | 0 | 3.319432  | -2.625081 | -1.533619 |
| 121 | 1 | 0 | 4.006655  | -1.770090 | -1.500334 |
| 122 | 6 | 0 | 3.730177  | -3.475612 | -2.787515 |
| 123 | 6 | 0 | 3.898384  | -2.527731 | -3.996933 |
| 124 | 1 | 0 | 2.949839  | -2.075729 | -4.289464 |
| 125 | 1 | 0 | 4.290875  | -3.093529 | -4.850501 |
| 126 | 1 | 0 | 4.606327  | -1.720470 | -3.774146 |
| 127 | 6 | 0 | 5.105238  | -4.120621 | -2.505044 |
| 128 | 1 | 0 | 5.052167  | -4.871877 | -1.709102 |
| 129 | 1 | 0 | 5.853318  | -3.372693 | -2.218614 |

|     |   |   |           |           |           |
|-----|---|---|-----------|-----------|-----------|
| 130 | 1 | 0 | 5.462517  | -4.626800 | -3.409004 |
| 131 | 6 | 0 | 2.717311  | -4.584378 | -3.132409 |
| 132 | 1 | 0 | 1.732166  | -4.167841 | -3.354809 |
| 133 | 1 | 0 | 2.604875  | -5.304155 | -2.316301 |
| 134 | 1 | 0 | 3.065669  | -5.131033 | -4.017497 |
| 135 | 6 | 0 | -0.810998 | -3.245672 | 3.628545  |
| 136 | 6 | 0 | -1.574576 | -2.672738 | 4.655347  |
| 137 | 6 | 0 | -1.831315 | -1.295984 | 4.705140  |
| 138 | 6 | 0 | -1.291071 | -0.507590 | 3.697712  |
| 139 | 6 | 0 | -0.503814 | -1.062568 | 2.651694  |
| 140 | 6 | 0 | -0.276234 | -2.445841 | 2.619107  |
| 141 | 7 | 0 | -1.408730 | 0.861680  | 3.490599  |
| 142 | 6 | 0 | -0.754751 | 1.260852  | 2.323587  |
| 143 | 6 | 0 | -0.137056 | -0.016650 | 1.713870  |
| 144 | 8 | 0 | -0.737613 | 2.403075  | 1.910593  |
| 145 | 1 | 0 | -0.658682 | -4.319745 | 3.607582  |
| 146 | 1 | 0 | -1.992064 | -3.312447 | 5.428469  |
| 147 | 1 | 0 | -2.441676 | -0.869369 | 5.495722  |
| 148 | 1 | 0 | 0.292279  | -2.879253 | 1.803820  |
| 149 | 1 | 0 | -1.965732 | 1.501318  | 4.039388  |
| 150 | 6 | 0 | 2.101176  | 1.520876  | 2.266976  |
| 151 | 1 | 0 | 2.074442  | 2.014538  | 1.299862  |
| 152 | 6 | 0 | 2.002507  | 0.151179  | 2.252660  |
| 153 | 1 | 0 | 2.022718  | -0.417272 | 3.177533  |
| 154 | 1 | 0 | 2.226881  | -0.402433 | 1.348424  |
| 155 | 6 | 0 | 2.121419  | 2.392545  | 3.424093  |
| 156 | 6 | 0 | 2.016084  | 3.785194  | 3.215713  |
| 157 | 6 | 0 | 2.245097  | 1.915497  | 4.748615  |
| 158 | 6 | 0 | 2.027542  | 4.666844  | 4.293410  |
| 159 | 1 | 0 | 1.925135  | 4.163624  | 2.201934  |
| 160 | 6 | 0 | 2.254481  | 2.799072  | 5.820105  |
| 161 | 1 | 0 | 2.345014  | 0.850056  | 4.932449  |
| 162 | 6 | 0 | 2.144646  | 4.177892  | 5.596391  |
| 163 | 1 | 0 | 1.943894  | 5.735381  | 4.116882  |
| 164 | 1 | 0 | 2.353466  | 2.419528  | 6.833417  |
| 165 | 1 | 0 | 2.156346  | 4.865813  | 6.437649  |

---

## 15. Possible complexes of catalyst and diazooxindole

C1:

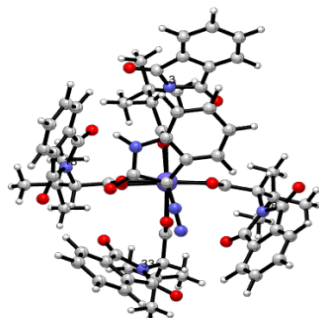

**E=-4334.4457363 a.u (E<sub>rel</sub>=0.0)**

| Center Number | Atomic Number | Atomic Type | Coordinates (Angstroms) |           |           |
|---------------|---------------|-------------|-------------------------|-----------|-----------|
| Z             |               |             | X                       | Y         | Z         |
| 1             | 45            | 0           | 0.144083                | 0.158887  | -0.128620 |
| 2             | 45            | 0           | 0.284153                | 0.180367  | -2.548935 |
| 3             | 7             | 0           | -4.553170               | 1.154326  | -0.550318 |
| 4             | 8             | 0           | -3.460472               | 3.145398  | -1.148788 |
| 5             | 8             | 0           | -5.796838               | -0.445745 | 0.641039  |
| 6             | 6             | 0           | -4.288034               | 2.541661  | -0.471182 |
| 7             | 6             | 0           | -5.217239               | 3.053512  | 0.582719  |
| 8             | 6             | 0           | -5.420763               | 4.342906  | 1.038153  |
| 9             | 1             | 0           | -4.864840               | 5.173257  | 0.620434  |
| 10            | 6             | 0           | -6.367846               | 4.530252  | 2.058173  |
| 11            | 1             | 0           | -6.558394               | 5.527640  | 2.436311  |
| 12            | 6             | 0           | -7.072746               | 3.444593  | 2.594042  |
| 13            | 1             | 0           | -7.799776               | 3.616392  | 3.378863  |
| 14            | 6             | 0           | -6.852540               | 2.139716  | 2.123424  |
| 15            | 1             | 0           | -7.393793               | 1.292797  | 2.527659  |
| 16            | 6             | 0           | -5.921918               | 1.971973  | 1.113913  |
| 17            | 6             | 0           | -5.465889               | 0.724325  | 0.425712  |
| 18            | 7             | 0           | -1.396541               | -4.155587 | -0.213306 |
| 19            | 8             | 0           | -3.026771               | -2.682526 | -1.034112 |
| 20            | 8             | 0           | -0.058935               | -5.418252 | 1.245570  |
| 21            | 6             | 0           | -2.583841               | -3.403875 | -0.136325 |
| 22            | 6             | 0           | -3.133489               | -3.652527 | 1.225410  |
| 23            | 6             | 0           | -4.266424               | -3.125561 | 1.827294  |
| 24            | 1             | 0           | -4.904747               | -2.418403 | 1.306437  |
| 25            | 6             | 0           | -4.514323               | -3.504947 | 3.158561  |
| 26            | 1             | 0           | -5.389848               | -3.120334 | 3.668431  |
| 27            | 6             | 0           | -3.646960               | -4.372642 | 3.838423  |
| 28            | 1             | 0           | -3.865529               | -4.646966 | 4.863633  |

|    |   |   |           |           |           |
|----|---|---|-----------|-----------|-----------|
| 29 | 6 | 0 | -2.491986 | -4.873575 | 3.217793  |
| 30 | 1 | 0 | -1.799030 | -5.517283 | 3.744781  |
| 31 | 6 | 0 | -2.253551 | -4.493328 | 1.909370  |
| 32 | 6 | 0 | -1.088079 | -4.785417 | 1.016653  |
| 33 | 7 | 0 | 4.292503  | -1.727152 | 0.085532  |
| 34 | 8 | 0 | 2.582008  | -3.177220 | -0.612293 |
| 35 | 8 | 0 | 5.780044  | -0.503132 | 1.424914  |
| 36 | 6 | 0 | 3.355542  | -2.775019 | 0.259013  |
| 37 | 6 | 0 | 3.522448  | -3.230018 | 1.665814  |
| 38 | 6 | 0 | 2.823787  | -4.195952 | 2.369367  |
| 39 | 1 | 0 | 1.998835  | -4.738242 | 1.921090  |
| 40 | 6 | 0 | 3.195975  | -4.402565 | 3.708413  |
| 41 | 1 | 0 | 2.673147  | -5.148193 | 4.295177  |
| 42 | 6 | 0 | 4.218151  | -3.653047 | 4.302580  |
| 43 | 1 | 0 | 4.480634  | -3.836260 | 5.337890  |
| 44 | 6 | 0 | 4.894214  | -2.654573 | 3.582514  |
| 45 | 1 | 0 | 5.669071  | -2.051491 | 4.039726  |
| 46 | 6 | 0 | 4.526290  | -2.460641 | 2.263475  |
| 47 | 6 | 0 | 4.991357  | -1.440588 | 1.277116  |
| 48 | 7 | 0 | 2.418722  | 4.118573  | -0.030302 |
| 49 | 8 | 0 | 3.676457  | 2.250544  | -0.693504 |
| 50 | 8 | 0 | 1.454231  | 5.830606  | 1.252096  |
| 51 | 6 | 0 | 3.389430  | 3.110750  | 0.142009  |
| 52 | 6 | 0 | 3.951758  | 3.324467  | 1.506390  |
| 53 | 6 | 0 | 4.913457  | 2.600029  | 2.191850  |
| 54 | 1 | 0 | 5.363144  | 1.707110  | 1.771243  |
| 55 | 6 | 0 | 5.244788  | 3.041433  | 3.484200  |
| 56 | 1 | 0 | 5.991153  | 2.500680  | 4.053648  |
| 57 | 6 | 0 | 4.622992  | 4.160062  | 4.051797  |
| 58 | 1 | 0 | 4.901401  | 4.475516  | 5.050326  |
| 59 | 6 | 0 | 3.634400  | 4.869501  | 3.350895  |
| 60 | 1 | 0 | 3.133414  | 5.725363  | 3.786518  |
| 61 | 6 | 0 | 3.315785  | 4.430277  | 2.078618  |
| 62 | 6 | 0 | 2.286486  | 4.934428  | 1.121012  |
| 63 | 8 | 0 | -1.887778 | 0.483393  | -0.301522 |
| 64 | 8 | 0 | -1.751355 | 0.412077  | -2.589655 |
| 65 | 8 | 0 | -0.240577 | -1.825708 | -0.259970 |
| 66 | 8 | 0 | -0.000464 | -1.868657 | -2.536504 |
| 67 | 8 | 0 | 2.143208  | -0.247260 | -0.120776 |
| 68 | 8 | 0 | 2.307867  | -0.173620 | -2.402466 |
| 69 | 8 | 0 | 0.615285  | 2.156594  | -0.122346 |
| 70 | 8 | 0 | 0.658550  | 2.210042  | -2.414778 |
| 71 | 6 | 0 | -2.416611 | 0.427222  | -1.483660 |
| 72 | 6 | 0 | -3.939800 | 0.241686  | -1.522976 |

|     |   |   |           |           |           |
|-----|---|---|-----------|-----------|-----------|
| 73  | 1 | 0 | -4.087363 | -0.761461 | -1.102525 |
| 74  | 6 | 0 | -4.628431 | 0.258360  | -2.927258 |
| 75  | 6 | 0 | -6.159158 | 0.151783  | -2.707121 |
| 76  | 1 | 0 | -6.650624 | 0.003385  | -3.674614 |
| 77  | 1 | 0 | -6.556869 | 1.068669  | -2.259051 |
| 78  | 1 | 0 | -6.403768 | -0.692631 | -2.052722 |
| 79  | 6 | 0 | -4.318094 | 1.527134  | -3.754180 |
| 80  | 1 | 0 | -3.244991 | 1.602137  | -3.935047 |
| 81  | 1 | 0 | -4.649269 | 2.433561  | -3.241737 |
| 82  | 1 | 0 | -4.840764 | 1.459397  | -4.715907 |
| 83  | 6 | 0 | -4.165641 | -1.000273 | -3.707015 |
| 84  | 1 | 0 | -3.096073 | -0.945682 | -3.912714 |
| 85  | 1 | 0 | -4.712232 | -1.055892 | -4.655242 |
| 86  | 1 | 0 | -4.361800 | -1.908142 | -3.127850 |
| 87  | 6 | 0 | -0.203648 | -2.439535 | -1.400495 |
| 88  | 6 | 0 | -0.373420 | -3.960050 | -1.259113 |
| 89  | 1 | 0 | 0.563659  | -4.284941 | -0.788256 |
| 90  | 6 | 0 | -0.570011 | -4.794790 | -2.553521 |
| 91  | 6 | 0 | -1.747016 | -4.301012 | -3.422919 |
| 92  | 1 | 0 | -2.692760 | -4.356732 | -2.878566 |
| 93  | 1 | 0 | -1.818492 | -4.929450 | -4.318486 |
| 94  | 1 | 0 | -1.582423 | -3.265266 | -3.725741 |
| 95  | 6 | 0 | -0.812305 | -6.265058 | -2.132214 |
| 96  | 1 | 0 | -1.782485 | -6.370340 | -1.635888 |
| 97  | 1 | 0 | -0.030834 | -6.607118 | -1.443310 |
| 98  | 1 | 0 | -0.805804 | -6.904343 | -3.021745 |
| 99  | 6 | 0 | 0.750386  | -4.719826 | -3.363374 |
| 100 | 1 | 0 | 1.594169  | -5.071677 | -2.758281 |
| 101 | 1 | 0 | 0.946856  | -3.691423 | -3.671468 |
| 102 | 1 | 0 | 0.666931  | -5.353105 | -4.253714 |
| 103 | 6 | 0 | 2.800458  | -0.377859 | -1.234019 |
| 104 | 6 | 0 | 4.270207  | -0.778197 | -1.042434 |
| 105 | 1 | 0 | 4.750217  | 0.127098  | -0.649997 |
| 106 | 6 | 0 | 5.063764  | -1.229059 | -2.302792 |
| 107 | 6 | 0 | 5.234311  | 0.006122  | -3.224090 |
| 108 | 1 | 0 | 5.739266  | 0.819882  | -2.689997 |
| 109 | 1 | 0 | 4.259935  | 0.360044  | -3.564492 |
| 110 | 1 | 0 | 5.841314  | -0.270603 | -4.093437 |
| 111 | 6 | 0 | 6.464129  | -1.694459 | -1.832269 |
| 112 | 1 | 0 | 6.936520  | -0.933772 | -1.199490 |
| 113 | 1 | 0 | 7.099360  | -1.872484 | -2.706759 |
| 114 | 1 | 0 | 6.391501  | -2.624950 | -1.260297 |
| 115 | 6 | 0 | 4.371484  | -2.370734 | -3.080028 |
| 116 | 1 | 0 | 3.395113  | -2.042213 | -3.441114 |

|     |   |   |           |           |           |
|-----|---|---|-----------|-----------|-----------|
| 117 | 1 | 0 | 4.227011  | -3.249911 | -2.448360 |
| 118 | 1 | 0 | 4.995176  | -2.649251 | -3.937706 |
| 119 | 6 | 0 | 0.861968  | 2.735428  | -1.257190 |
| 120 | 6 | 0 | 1.426423  | 4.164548  | -1.121832 |
| 121 | 1 | 0 | 0.616093  | 4.779743  | -0.705749 |
| 122 | 6 | 0 | 1.912783  | 4.869840  | -2.422627 |
| 123 | 6 | 0 | 0.665825  | 5.136991  | -3.303753 |
| 124 | 1 | 0 | 0.182671  | 4.195257  | -3.571163 |
| 125 | 1 | 0 | 0.972162  | 5.654403  | -4.219574 |
| 126 | 1 | 0 | -0.053678 | 5.772972  | -2.772817 |
| 127 | 6 | 0 | 2.535822  | 6.228643  | -2.016545 |
| 128 | 1 | 0 | 3.482533  | 6.077131  | -1.487972 |
| 129 | 1 | 0 | 1.859894  | 6.792261  | -1.362959 |
| 130 | 1 | 0 | 2.733144  | 6.819428  | -2.917544 |
| 131 | 6 | 0 | 2.951109  | 4.045431  | -3.216743 |
| 132 | 1 | 0 | 2.510296  | 3.105570  | -3.551558 |
| 133 | 1 | 0 | 3.828223  | 3.818025  | -2.606781 |
| 134 | 1 | 0 | 3.269783  | 4.624998  | -4.091132 |
| 135 | 6 | 0 | -1.957295 | 3.240843  | 2.995617  |
| 136 | 6 | 0 | -3.154940 | 2.568113  | 3.256217  |
| 137 | 6 | 0 | -3.230756 | 1.170604  | 3.190580  |
| 138 | 6 | 0 | -2.079987 | 0.464914  | 2.873266  |
| 139 | 6 | 0 | -0.867041 | 1.144158  | 2.618509  |
| 140 | 6 | 0 | -0.796987 | 2.528755  | 2.665879  |
| 141 | 7 | 0 | -1.873937 | -0.915628 | 2.779716  |
| 142 | 6 | 0 | -0.545490 | -1.253087 | 2.523386  |
| 143 | 6 | 0 | 0.117479  | 0.099368  | 2.302312  |
| 144 | 8 | 0 | -0.051118 | -2.380083 | 2.514774  |
| 145 | 1 | 0 | -1.924436 | 4.322698  | 3.037012  |
| 146 | 1 | 0 | -4.047052 | 3.132182  | 3.497433  |
| 147 | 1 | 0 | -4.164157 | 0.656787  | 3.382126  |
| 148 | 1 | 0 | 0.121618  | 3.043917  | 2.418571  |
| 149 | 1 | 0 | -2.601101 | -1.620472 | 2.842434  |
| 150 | 7 | 0 | 1.425686  | 0.216692  | 2.502670  |
| 151 | 7 | 0 | 2.559148  | 0.269208  | 2.588844  |

---

**C2:**

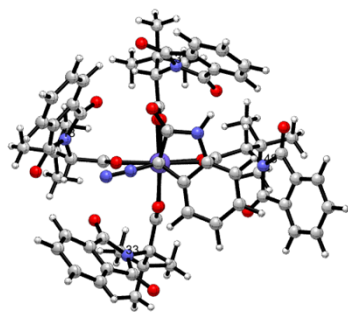

**E= -4334.4457365 a.u (E<sub>rel</sub>=0.0)**

| Center<br>Number<br>Z | Atomic<br>Number | Atomic<br>Type | Coordinates (Angstroms) |           |           |
|-----------------------|------------------|----------------|-------------------------|-----------|-----------|
|                       |                  |                | X                       | Y         | Z         |
| 1                     | 45               | 0              | 0.144077                | 0.159019  | -0.128549 |
| 2                     | 45               | 0              | 0.284245                | 0.180809  | -2.548892 |
| 3                     | 7                | 0              | -1.397235               | -4.155282 | -0.213889 |
| 4                     | 8                | 0              | -3.026996               | -2.681537 | -1.034441 |
| 5                     | 8                | 0              | -0.060144               | -5.418729 | 1.244798  |
| 6                     | 6                | 0              | -2.584379               | -3.403315 | -0.136844 |
| 7                     | 6                | 0              | -3.134342               | -3.652338 | 1.224693  |
| 8                     | 6                | 0              | -4.267249               | -3.125333 | 1.826570  |
| 9                     | 1                | 0              | -4.905297               | -2.417770 | 1.305920  |
| 10                    | 6                | 0              | -4.515493               | -3.505196 | 3.157644  |
| 11                    | 1                | 0              | -5.391012               | -3.120558 | 3.667505  |
| 12                    | 6                | 0              | -3.648493               | -4.373395 | 3.837312  |
| 13                    | 1                | 0              | -3.867310               | -4.648090 | 4.862370  |
| 14                    | 6                | 0              | -2.493504               | -4.874354 | 3.216699  |
| 15                    | 1                | 0              | -1.800836               | -5.518472 | 3.743566  |
| 16                    | 6                | 0              | -2.254721               | -4.493640 | 1.908483  |
| 17                    | 6                | 0              | -1.089104               | -4.785575 | 1.015907  |
| 18                    | 7                | 0              | 4.292186                | -1.727866 | 0.085519  |
| 19                    | 8                | 0              | 2.581506                | -3.177581 | -0.612667 |
| 20                    | 8                | 0              | 5.779904                | -0.504416 | 1.425240  |
| 21                    | 6                | 0              | 3.355040                | -2.775637 | 0.258755  |
| 22                    | 6                | 0              | 3.521861                | -3.230988 | 1.665441  |
| 23                    | 6                | 0              | 2.823012                | -4.196957 | 2.368761  |
| 24                    | 1                | 0              | 1.997841                | -4.738827 | 1.920392  |
| 25                    | 6                | 0              | 3.195226                | -4.404034 | 3.707729  |
| 26                    | 1                | 0              | 2.672260                | -5.149709 | 4.294310  |
| 27                    | 6                | 0              | 4.217592                | -3.654899 | 4.302055  |
| 28                    | 1                | 0              | 4.480087                | -3.838463 | 5.337299  |
| 29                    | 6                | 0              | 4.893806                | -2.656340 | 3.582246  |
| 30                    | 1                | 0              | 5.668787                | -2.053522 | 4.039595  |
| 31                    | 6                | 0              | 4.525861                | -2.461965 | 2.263280  |



|    |   |   |           |           |           |
|----|---|---|-----------|-----------|-----------|
| 32 | 6 | 0 | 4.991045  | -1.441694 | 1.277201  |
| 33 | 7 | 0 | 2.419117  | 4.118406  | -0.029705 |
| 34 | 8 | 0 | 3.676420  | 2.250128  | -0.692967 |
| 35 | 8 | 0 | 1.455302  | 5.830917  | 1.252552  |
| 36 | 6 | 0 | 3.389572  | 3.110367  | 0.142582  |
| 37 | 6 | 0 | 3.952079  | 3.324027  | 1.506889  |
| 38 | 6 | 0 | 4.913655  | 2.599381  | 2.192295  |
| 39 | 1 | 0 | 5.363035  | 1.706296  | 1.771700  |
| 40 | 6 | 0 | 5.245245  | 3.040808  | 3.484576  |
| 41 | 1 | 0 | 5.991543  | 2.499920  | 4.053983  |
| 42 | 6 | 0 | 4.623793  | 4.159640  | 4.052153  |
| 43 | 1 | 0 | 4.902396  | 4.475108  | 5.050622  |
| 44 | 6 | 0 | 3.635303  | 4.869280  | 3.351300  |
| 45 | 1 | 0 | 3.134568  | 5.725289  | 3.786922  |
| 46 | 6 | 0 | 3.316453  | 4.430047  | 2.079091  |
| 47 | 6 | 0 | 2.287207  | 4.934402  | 1.121541  |
| 48 | 7 | 0 | -4.552911 | 1.155260  | -0.550263 |
| 49 | 8 | 0 | -3.459855 | 3.146223  | -1.148465 |
| 50 | 8 | 0 | -5.796719 | -0.444790 | 0.640939  |
| 51 | 6 | 0 | -4.287411 | 2.542511  | -0.470834 |
| 52 | 6 | 0 | -5.216345 | 3.054341  | 0.583282  |
| 53 | 6 | 0 | -5.419589 | 4.343747  | 1.038857  |
| 54 | 1 | 0 | -4.863270 | 5.173898  | 0.621323  |
| 55 | 6 | 0 | -6.366538 | 4.531225  | 2.058935  |
| 56 | 1 | 0 | -6.556858 | 5.528604  | 2.437203  |
| 57 | 6 | 0 | -7.071658 | 3.445633  | 2.594713  |
| 58 | 1 | 0 | -7.798612 | 3.617490  | 3.379591  |
| 59 | 6 | 0 | -6.851777 | 2.140760  | 2.123929  |
| 60 | 1 | 0 | -7.393245 | 1.293941  | 2.528090  |
| 61 | 6 | 0 | -5.921249 | 1.972894  | 1.114343  |
| 62 | 6 | 0 | -5.465598 | 0.725258  | 0.425766  |
| 63 | 8 | 0 | -0.241214 | -1.825411 | -0.260143 |
| 64 | 8 | 0 | -0.000566 | -1.868193 | -2.536628 |
| 65 | 8 | 0 | 2.143076  | -0.247616 | -0.120576 |
| 66 | 8 | 0 | 2.307898  | -0.173567 | -2.402237 |
| 67 | 8 | 0 | 0.615430  | 2.156696  | -0.122138 |
| 68 | 8 | 0 | 0.658811  | 2.210474  | -2.414555 |
| 69 | 8 | 0 | -1.887702 | 0.484188  | -0.301566 |
| 70 | 8 | 0 | -1.751203 | 0.412890  | -2.589712 |
| 71 | 6 | 0 | -0.204105 | -2.439153 | -1.400733 |
| 72 | 6 | 0 | -0.373976 | -3.959679 | -1.259540 |
| 73 | 1 | 0 | 0.563025  | -4.284730 | -0.788634 |
| 74 | 6 | 0 | -0.570491 | -4.794227 | -2.554111 |
| 75 | 6 | 0 | -0.812903 | -6.264538 | -2.133048 |

|     |   |   |           |           |           |
|-----|---|---|-----------|-----------|-----------|
| 76  | 1 | 0 | -0.806398 | -6.903682 | -3.022680 |
| 77  | 1 | 0 | -1.783125 | -6.369840 | -1.636804 |
| 78  | 1 | 0 | -0.031504 | -6.606759 | -1.444146 |
| 79  | 6 | 0 | -1.747384 | -4.300259 | -3.423548 |
| 80  | 1 | 0 | -1.582648 | -3.264516 | -3.726303 |
| 81  | 1 | 0 | -2.693162 | -4.355881 | -2.879248 |
| 82  | 1 | 0 | -1.818881 | -4.928639 | -4.319155 |
| 83  | 6 | 0 | 0.750001  | -4.719207 | -3.363805 |
| 84  | 1 | 0 | 0.946457  | -3.690796 | -3.671878 |
| 85  | 1 | 0 | 0.666709  | -5.352497 | -4.254152 |
| 86  | 1 | 0 | 1.593736  | -5.070987 | -2.758601 |
| 87  | 6 | 0 | 2.800402  | -0.378028 | -1.233811 |
| 88  | 6 | 0 | 4.270074  | -0.778597 | -1.042217 |
| 89  | 1 | 0 | 4.750143  | 0.126535  | -0.649483 |
| 90  | 6 | 0 | 5.063704  | -1.229147 | -2.302646 |
| 91  | 6 | 0 | 4.371476  | -2.370621 | -3.080219 |
| 92  | 1 | 0 | 4.227240  | -3.250073 | -2.448883 |
| 93  | 1 | 0 | 4.995077  | -2.648689 | -3.938106 |
| 94  | 1 | 0 | 3.394997  | -2.042105 | -3.441020 |
| 95  | 6 | 0 | 6.464057  | -1.694647 | -1.832187 |
| 96  | 1 | 0 | 6.391413  | -2.625301 | -1.260486 |
| 97  | 1 | 0 | 6.936409  | -0.934127 | -1.199178 |
| 98  | 1 | 0 | 7.099336  | -1.872415 | -2.706696 |
| 99  | 6 | 0 | 5.234280  | 0.006254  | -3.223633 |
| 100 | 1 | 0 | 5.739236  | 0.819874  | -2.689330 |
| 101 | 1 | 0 | 4.259915  | 0.360257  | -3.563978 |
| 102 | 1 | 0 | 5.841307  | -0.270267 | -4.093030 |
| 103 | 6 | 0 | 0.862243  | 2.735667  | -1.256881 |
| 104 | 6 | 0 | 1.426921  | 4.164691  | -1.121313 |
| 105 | 1 | 0 | 0.616681  | 4.780014  | -0.705253 |
| 106 | 6 | 0 | 1.913551  | 4.870000  | -2.422012 |
| 107 | 6 | 0 | 0.666728  | 5.137318  | -3.303272 |
| 108 | 1 | 0 | -0.052764 | 5.773378  | -2.772413 |
| 109 | 1 | 0 | 0.183502  | 4.195637  | -3.570744 |
| 110 | 1 | 0 | 0.973219  | 5.654706  | -4.219057 |
| 111 | 6 | 0 | 2.536700  | 6.228718  | -2.015788 |
| 112 | 1 | 0 | 1.860791  | 6.792365  | -1.362213 |
| 113 | 1 | 0 | 2.734166  | 6.819524  | -2.916739 |
| 114 | 1 | 0 | 3.483358  | 6.077074  | -1.487154 |
| 115 | 6 | 0 | 2.951875  | 4.045511  | -3.216054 |
| 116 | 1 | 0 | 2.511023  | 3.105661  | -3.550842 |
| 117 | 1 | 0 | 3.828959  | 3.818090  | -2.606058 |
| 118 | 1 | 0 | 3.270596  | 4.625040  | -4.090452 |
| 119 | 6 | 0 | -2.416481 | 0.428055  | -1.483730 |

|     |   |   |           |           |           |
|-----|---|---|-----------|-----------|-----------|
| 120 | 6 | 0 | -3.939691 | 0.242657  | -1.523084 |
| 121 | 1 | 0 | -4.087417 | -0.760535 | -1.102808 |
| 122 | 6 | 0 | -4.628333 | 0.259755  | -2.927342 |
| 123 | 6 | 0 | -4.165778 | -0.998802 | -3.707361 |
| 124 | 1 | 0 | -3.096189 | -0.944390 | -3.912989 |
| 125 | 1 | 0 | -4.712306 | -1.054066 | -4.655651 |
| 126 | 1 | 0 | -4.362200 | -1.906758 | -3.128431 |
| 127 | 6 | 0 | -6.159070 | 0.153429  | -2.707186 |
| 128 | 1 | 0 | -6.556581 | 1.070296  | -2.258897 |
| 129 | 1 | 0 | -6.403827 | -0.691082 | -2.052965 |
| 130 | 1 | 0 | -6.650608 | 0.005338  | -3.674692 |
| 131 | 6 | 0 | -4.317753 | 1.528643  | -3.753993 |
| 132 | 1 | 0 | -3.244638 | 1.603453  | -3.934878 |
| 133 | 1 | 0 | -4.648684 | 2.435022  | -3.241312 |
| 134 | 1 | 0 | -4.840482 | 1.461234  | -4.715708 |
| 135 | 6 | 0 | -1.957140 | 3.239671  | 2.996035  |
| 136 | 6 | 0 | -3.154669 | 2.566931  | 3.257065  |
| 137 | 6 | 0 | -3.230533 | 1.169426  | 3.191284  |
| 138 | 6 | 0 | -2.079896 | 0.463747  | 2.873602  |
| 139 | 6 | 0 | -0.867018 | 1.142996  | 2.618559  |
| 140 | 6 | 0 | -0.796932 | 2.527583  | 2.665871  |
| 141 | 7 | 0 | -1.873913 | -0.916793 | 2.779710  |
| 142 | 6 | 0 | -0.545571 | -1.254239 | 2.522845  |
| 143 | 6 | 0 | 0.117401  | 0.098163  | 2.301644  |
| 144 | 8 | 0 | -0.051334 | -2.381276 | 2.513772  |
| 145 | 1 | 0 | -1.924353 | 4.321532  | 3.037299  |
| 146 | 1 | 0 | -4.046705 | 3.130992  | 3.498480  |
| 147 | 1 | 0 | -4.163998 | 0.655758  | 3.382852  |
| 148 | 1 | 0 | 0.121569  | 3.042657  | 2.418017  |
| 149 | 1 | 0 | -2.601048 | -1.621673 | 2.842349  |
| 150 | 7 | 0 | 1.425605  | 0.215445  | 2.502445  |
| 151 | 7 | 0 | 2.559036  | 0.268035  | 2.588815  |

-----

**C3:**

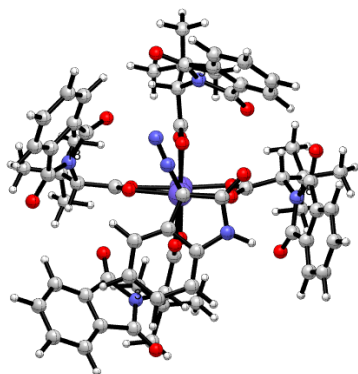

**E= -4334.4433717 a.u (E<sub>rel</sub>=1.5 kcal/mol)**

| Center<br>Number | Atomic<br>Number | Atomic<br>Type | Coordinates (Angstroms) |           |           |
|------------------|------------------|----------------|-------------------------|-----------|-----------|
| Z                |                  |                | X                       | Y         | Z         |
| 1                | 45               | 0              | -0.002483               | -0.196653 | -0.163550 |
| 2                | 45               | 0              | -0.138439               | -0.120200 | -2.574677 |
| 3                | 7                | 0              | 3.140476                | 3.200782  | -0.226975 |
| 4                | 8                | 0              | 4.047984                | 1.156315  | -0.926345 |
| 5                | 8                | 0              | 2.446093                | 5.011300  | 1.093945  |
| 6                | 6                | 0              | 3.939664                | 2.040997  | -0.075724 |
| 7                | 6                | 0              | 4.558594                | 2.163040  | 1.273835  |
| 8                | 6                | 0              | 5.407410                | 1.296301  | 1.939770  |
| 9                | 1                | 0              | 5.690084                | 0.345944  | 1.502204  |
| 10               | 6                | 0              | 5.833882                | 1.680100  | 3.222186  |
| 11               | 1                | 0              | 6.499898                | 1.030231  | 3.777370  |
| 12               | 6                | 0              | 5.404962                | 2.879542  | 3.802927  |
| 13               | 1                | 0              | 5.751698                | 3.146464  | 4.794360  |
| 14               | 6                | 0              | 4.519581                | 3.732605  | 3.124857  |
| 15               | 1                | 0              | 4.164167                | 4.653069  | 3.571742  |
| 16               | 6                | 0              | 4.110351                | 3.351576  | 1.859907  |
| 17               | 6                | 0              | 3.143085                | 4.005840  | 0.930156  |
| 18               | 7                | 0              | -2.994267               | 3.305100  | 0.074686  |
| 19               | 8                | 0              | -0.856684               | 3.942509  | -0.656321 |
| 20               | 8                | 0              | -4.839187               | 2.815216  | 1.441673  |
| 21               | 6                | 0              | -1.729404               | 3.919436  | 0.213939  |
| 22               | 6                | 0              | -1.711835               | 4.487589  | 1.590178  |
| 23               | 6                | 0              | -0.704671               | 5.173211  | 2.248407  |
| 24               | 1                | 0              | 0.260929                | 5.342010  | 1.782996  |
| 25               | 6                | 0              | -0.971108               | 5.587327  | 3.564541  |
| 26               | 1                | 0              | -0.210525               | 6.126820  | 4.116097  |
| 27               | 6                | 0              | -2.197161               | 5.306389  | 4.179712  |
| 28               | 1                | 0              | -2.371822               | 5.639552  | 5.195890  |
| 29               | 6                | 0              | -3.197162               | 4.586486  | 3.505176  |

|    |   |   |           |           |           |
|----|---|---|-----------|-----------|-----------|
| 30 | 1 | 0 | -4.141002 | 4.347296  | 3.979677  |
| 31 | 6 | 0 | -2.930159 | 4.186893  | 2.208240  |
| 32 | 6 | 0 | -3.750811 | 3.368489  | 1.263040  |
| 33 | 7 | 0 | -3.875250 | -2.797450 | -0.303577 |
| 34 | 8 | 0 | -4.034310 | -0.546484 | -0.939372 |
| 35 | 8 | 0 | -4.104854 | -4.820009 | 0.870224  |
| 36 | 6 | 0 | -4.332337 | -1.474635 | -0.183352 |
| 37 | 6 | 0 | -5.235832 | -1.463674 | 1.003250  |
| 38 | 6 | 0 | -5.892144 | -0.404813 | 1.608532  |
| 39 | 1 | 0 | -5.760255 | 0.618160  | 1.272602  |
| 40 | 6 | 0 | -6.684182 | -0.701464 | 2.731029  |
| 41 | 1 | 0 | -7.212038 | 0.099296  | 3.235152  |
| 42 | 6 | 0 | -6.797787 | -2.012030 | 3.213139  |
| 43 | 1 | 0 | -7.422484 | -2.210135 | 4.076184  |
| 44 | 6 | 0 | -6.098677 | -3.067309 | 2.604768  |
| 45 | 1 | 0 | -6.156700 | -4.080123 | 2.984847  |
| 46 | 6 | 0 | -5.318817 | -2.764414 | 1.503841  |
| 47 | 6 | 0 | -4.398092 | -3.637254 | 0.713514  |
| 48 | 7 | 0 | 3.814677  | -2.846308 | -0.348593 |
| 49 | 8 | 0 | 2.038640  | -4.346705 | -0.722809 |
| 50 | 8 | 0 | 5.554962  | -1.643065 | 0.664101  |
| 51 | 6 | 0 | 2.945112  | -3.906210 | -0.018710 |
| 52 | 6 | 0 | 3.370319  | -4.348451 | 1.346879  |
| 53 | 6 | 0 | 2.868095  | -5.362384 | 2.147180  |
| 54 | 1 | 0 | 2.059774  | -5.994663 | 1.798726  |
| 55 | 6 | 0 | 3.453074  | -5.541573 | 3.411813  |
| 56 | 1 | 0 | 3.089185  | -6.325553 | 4.065183  |
| 57 | 6 | 0 | 4.506801  | -4.722347 | 3.838495  |
| 58 | 1 | 0 | 4.940934  | -4.881527 | 4.818245  |
| 59 | 6 | 0 | 5.003862  | -3.699098 | 3.016206  |
| 60 | 1 | 0 | 5.813162  | -3.055941 | 3.338458  |
| 61 | 6 | 0 | 4.414869  | -3.528673 | 1.776373  |
| 62 | 6 | 0 | 4.708791  | -2.535274 | 0.697889  |
| 63 | 8 | 0 | 1.185185  | 1.453496  | -0.273689 |
| 64 | 8 | 0 | 0.954268  | 1.624883  | -2.543571 |
| 65 | 8 | 0 | -1.609515 | 1.071072  | -0.084260 |
| 66 | 8 | 0 | -1.829080 | 1.026786  | -2.368579 |
| 67 | 8 | 0 | -1.306113 | -1.796413 | -0.192245 |
| 68 | 8 | 0 | -1.298710 | -1.817900 | -2.483810 |
| 69 | 8 | 0 | 1.634361  | -1.389696 | -0.392248 |
| 70 | 8 | 0 | 1.643572  | -1.157195 | -2.666485 |
| 71 | 6 | 0 | 1.387412  | 2.050118  | -1.409147 |
| 72 | 6 | 0 | 2.143562  | 3.378945  | -1.292983 |
| 73 | 1 | 0 | 1.403569  | 4.069916  | -0.867070 |

|     |   |   |           |           |           |
|-----|---|---|-----------|-----------|-----------|
| 74  | 6 | 0 | 2.684601  | 4.015193  | -2.606268 |
| 75  | 6 | 0 | 3.520122  | 5.259780  | -2.215469 |
| 76  | 1 | 0 | 3.782499  | 5.817984  | -3.120675 |
| 77  | 1 | 0 | 4.445644  | 4.963025  | -1.711550 |
| 78  | 1 | 0 | 2.953643  | 5.915636  | -1.544168 |
| 79  | 6 | 0 | 3.556612  | 3.045248  | -3.434410 |
| 80  | 1 | 0 | 2.967222  | 2.180211  | -3.745050 |
| 81  | 1 | 0 | 4.412473  | 2.689936  | -2.855695 |
| 82  | 1 | 0 | 3.923289  | 3.566196  | -4.326703 |
| 83  | 6 | 0 | 1.468818  | 4.482011  | -3.447781 |
| 84  | 1 | 0 | 0.860248  | 3.625745  | -3.742643 |
| 85  | 1 | 0 | 1.826462  | 4.995361  | -4.347460 |
| 86  | 1 | 0 | 0.845074  | 5.175707  | -2.871805 |
| 87  | 6 | 0 | -2.173618 | 1.432823  | -1.197925 |
| 88  | 6 | 0 | -3.354778 | 2.396922  | -1.026520 |
| 89  | 1 | 0 | -4.154293 | 1.767942  | -0.620013 |
| 90  | 6 | 0 | -3.913536 | 3.094873  | -2.301527 |
| 91  | 6 | 0 | -2.831872 | 3.844555  | -3.110581 |
| 92  | 1 | 0 | -2.347435 | 4.615536  | -2.507378 |
| 93  | 1 | 0 | -3.301313 | 4.318959  | -3.980426 |
| 94  | 1 | 0 | -2.068235 | 3.145107  | -3.454772 |
| 95  | 6 | 0 | -5.005463 | 4.095132  | -1.846853 |
| 96  | 1 | 0 | -4.562061 | 4.932030  | -1.297597 |
| 97  | 1 | 0 | -5.740896 | 3.604031  | -1.198536 |
| 98  | 1 | 0 | -5.521436 | 4.493280  | -2.727291 |
| 99  | 6 | 0 | -4.575193 | 2.009078  | -3.188923 |
| 100 | 1 | 0 | -5.342454 | 1.463815  | -2.627086 |
| 101 | 1 | 0 | -3.825333 | 1.295873  | -3.532921 |
| 102 | 1 | 0 | -5.046110 | 2.487839  | -4.054787 |
| 103 | 6 | 0 | -1.744802 | -2.210496 | -1.337341 |
| 104 | 6 | 0 | -2.866050 | -3.273258 | -1.270595 |
| 105 | 1 | 0 | -2.430100 | -4.155976 | -0.783565 |
| 106 | 6 | 0 | -3.466421 | -3.740494 | -2.633472 |
| 107 | 6 | 0 | -2.355063 | -4.489605 | -3.411406 |
| 108 | 1 | 0 | -1.997768 | -5.353402 | -2.836969 |
| 109 | 1 | 0 | -1.517398 | -3.820562 | -3.613827 |
| 110 | 1 | 0 | -2.760366 | -4.853287 | -4.362061 |
| 111 | 6 | 0 | -4.617881 | -4.736246 | -2.342390 |
| 112 | 1 | 0 | -4.299226 | -5.523387 | -1.651395 |
| 113 | 1 | 0 | -4.939806 | -5.193934 | -3.284146 |
| 114 | 1 | 0 | -5.476569 | -4.217069 | -1.903465 |
| 115 | 6 | 0 | -4.019436 | -2.573711 | -3.484088 |
| 116 | 1 | 0 | -3.218010 | -1.886575 | -3.754828 |
| 117 | 1 | 0 | -4.786183 | -2.016303 | -2.939277 |

|     |   |   |           |           |           |
|-----|---|---|-----------|-----------|-----------|
| 118 | 1 | 0 | -4.469378 | -2.982496 | -4.396517 |
| 119 | 6 | 0 | 2.197518  | -1.499743 | -1.552281 |
| 120 | 6 | 0 | 3.659220  | -1.962973 | -1.514708 |
| 121 | 1 | 0 | 4.210592  | -1.051922 | -1.233888 |
| 122 | 6 | 0 | 4.275246  | -2.499428 | -2.842774 |
| 123 | 6 | 0 | 4.469700  | -1.291818 | -3.795930 |
| 124 | 1 | 0 | 3.505051  | -0.838535 | -4.029769 |
| 125 | 1 | 0 | 4.942394  | -1.633305 | -4.723879 |
| 126 | 1 | 0 | 5.112384  | -0.534692 | -3.331350 |
| 127 | 6 | 0 | 5.666427  | -3.094949 | -2.514513 |
| 128 | 1 | 0 | 5.568090  | -4.019575 | -1.936641 |
| 129 | 1 | 0 | 6.266687  | -2.383374 | -1.935503 |
| 130 | 1 | 0 | 6.190810  | -3.324077 | -3.448621 |
| 131 | 6 | 0 | 3.393009  | -3.569079 | -3.525900 |
| 132 | 1 | 0 | 2.437289  | -3.129826 | -3.821461 |
| 133 | 1 | 0 | 3.192513  | -4.406512 | -2.853885 |
| 134 | 1 | 0 | 3.905258  | -3.941271 | -4.420867 |
| 135 | 6 | 0 | -2.907723 | -1.609093 | 3.521822  |
| 136 | 6 | 0 | -2.451008 | -2.923783 | 3.659782  |
| 137 | 6 | 0 | -1.123695 | -3.265150 | 3.371124  |
| 138 | 6 | 0 | -0.265378 | -2.260366 | 2.950294  |
| 139 | 6 | 0 | -0.730247 | -0.933219 | 2.793004  |
| 140 | 6 | 0 | -2.047497 | -0.599159 | 3.074041  |
| 141 | 7 | 0 | 1.101017  | -2.314012 | 2.654715  |
| 142 | 6 | 0 | 1.638331  | -1.068398 | 2.334048  |
| 143 | 6 | 0 | 0.422882  | -0.161193 | 2.322484  |
| 144 | 8 | 0 | 2.824448  | -0.795132 | 2.147132  |
| 145 | 1 | 0 | -3.940274 | -1.372911 | 3.741695  |
| 146 | 1 | 0 | -3.134787 | -3.696812 | 3.988719  |
| 147 | 1 | 0 | -0.777198 | -4.285184 | 3.481117  |
| 148 | 1 | 0 | -2.406281 | 0.413124  | 2.927684  |
| 149 | 1 | 0 | 1.665114  | -3.156324 | 2.627119  |
| 150 | 7 | 0 | 0.576852  | 1.146770  | 2.422450  |
| 151 | 7 | 0 | 0.772524  | 2.269872  | 2.426167  |

---

C4:

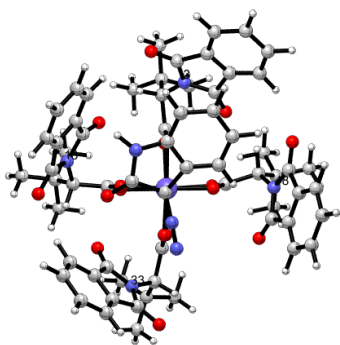

**E= -4334.4428038 a.u. (E<sub>rel</sub>=1.8 kcal/mol)**

| Center<br>Number<br>Z | Atomic<br>Number | Atomic<br>Type | Coordinates (Angstroms) |           |           |
|-----------------------|------------------|----------------|-------------------------|-----------|-----------|
|                       |                  |                | X                       | Y         | Z         |
| 1                     | 45               | 0              | 0.301200                | 0.336246  | -0.104659 |
| 2                     | 45               | 0              | 0.524799                | 0.398029  | -2.516523 |
| 3                     | 7                | 0              | -3.111313               | -2.903346 | -0.715514 |
| 4                     | 8                | 0              | -3.753438               | -0.766682 | -1.426909 |
| 5                     | 8                | 0              | -2.846495               | -4.842499 | 0.583671  |
| 6                     | 6                | 0              | -3.928600               | -1.756358 | -0.712205 |
| 7                     | 6                | 0              | -4.990436               | -2.030327 | 0.296098  |
| 8                     | 6                | 0              | -6.046904               | -1.234209 | 0.699747  |
| 9                     | 1                | 0              | -6.151788               | -0.221666 | 0.327565  |
| 10                    | 6                | 0              | -6.916811               | -1.767753 | 1.665573  |
| 11                    | 1                | 0              | -7.762045               | -1.180988 | 2.005373  |
| 12                    | 6                | 0              | -6.703656               | -3.043002 | 2.205274  |
| 13                    | 1                | 0              | -7.394604               | -3.430772 | 2.944756  |
| 14                    | 6                | 0              | -5.599194               | -3.818858 | 1.813858  |
| 15                    | 1                | 0              | -5.412254               | -4.794854 | 2.245249  |
| 16                    | 6                | 0              | -4.756112               | -3.290082 | 0.853494  |
| 17                    | 6                | 0              | -3.483551               | -3.830969 | 0.278187  |
| 18                    | 7                | 0              | 3.062427                | -3.264730 | 0.051232  |
| 19                    | 8                | 0              | 0.999358                | -3.783397 | -0.945539 |
| 20                    | 8                | 0              | 4.731873                | -2.878315 | 1.656903  |
| 21                    | 6                | 0              | 1.767234                | -3.815348 | 0.019737  |
| 22                    | 6                | 0              | 1.540818                | -4.399095 | 1.372516  |
| 23                    | 6                | 0              | 0.414190                | -5.023043 | 1.887930  |
| 24                    | 1                | 0              | -0.489179               | -5.152301 | 1.299185  |
| 25                    | 6                | 0              | 0.469135                | -5.426125 | 3.233991  |
| 26                    | 1                | 0              | -0.387857               | -5.918989 | 3.677765  |
| 27                    | 6                | 0              | 1.612714                | -5.197234 | 4.013966  |
| 28                    | 1                | 0              | 1.623605                | -5.518680 | 5.048634  |
| 29                    | 6                | 0              | 2.732611                | -4.540658 | 3.479389  |



|    |   |   |           |           |           |
|----|---|---|-----------|-----------|-----------|
| 30 | 1 | 0 | 3.607360  | -4.328742 | 4.081228  |
| 31 | 6 | 0 | 2.670176  | -4.147262 | 2.154475  |
| 32 | 6 | 0 | 3.648581  | -3.363052 | 1.336186  |
| 33 | 7 | 0 | 4.090490  | 2.833391  | 0.243853  |
| 34 | 8 | 0 | 4.366134  | 0.594929  | -0.400737 |
| 35 | 8 | 0 | 4.002455  | 4.814713  | 1.496229  |
| 36 | 6 | 0 | 4.440331  | 1.483079  | 0.452084  |
| 37 | 6 | 0 | 4.901849  | 1.402158  | 1.865607  |
| 38 | 6 | 0 | 5.299765  | 0.300360  | 2.603812  |
| 39 | 1 | 0 | 5.276995  | -0.701142 | 2.189703  |
| 40 | 6 | 0 | 5.682862  | 0.529863  | 3.935734  |
| 41 | 1 | 0 | 5.997806  | -0.306507 | 4.548040  |
| 42 | 6 | 0 | 5.651222  | 1.815016  | 4.490294  |
| 43 | 1 | 0 | 5.953120  | 1.958581  | 5.521125  |
| 44 | 6 | 0 | 5.216592  | 2.916429  | 3.735690  |
| 45 | 1 | 0 | 5.165198  | 3.911495  | 4.160494  |
| 46 | 6 | 0 | 4.843859  | 2.682850  | 2.424463  |
| 47 | 6 | 0 | 4.284164  | 3.621213  | 1.408019  |
| 48 | 7 | 0 | -3.482936 | 3.150671  | -0.314202 |
| 49 | 8 | 0 | -1.602614 | 4.557910  | -0.470597 |
| 50 | 8 | 0 | -5.369772 | 2.010876  | 0.508824  |
| 51 | 6 | 0 | -2.606916 | 4.173526  | 0.123370  |
| 52 | 6 | 0 | -3.174938 | 4.642722  | 1.423347  |
| 53 | 6 | 0 | -2.731269 | 5.637057  | 2.276538  |
| 54 | 1 | 0 | -1.842656 | 6.211648  | 2.045054  |
| 55 | 6 | 0 | -3.473963 | 5.868556  | 3.445264  |
| 56 | 1 | 0 | -3.157084 | 6.639373  | 4.137448  |
| 57 | 6 | 0 | -4.620310 | 5.116315  | 3.729834  |
| 58 | 1 | 0 | -5.175903 | 5.315530  | 4.638334  |
| 59 | 6 | 0 | -5.057405 | 4.108233  | 2.855823  |
| 60 | 1 | 0 | -5.942810 | 3.521191  | 3.067449  |
| 61 | 6 | 0 | -4.316374 | 3.890157  | 1.707786  |
| 62 | 6 | 0 | -4.512591 | 2.893566  | 0.609083  |
| 63 | 8 | 0 | -0.950964 | -1.280264 | -0.336466 |
| 64 | 8 | 0 | -0.638548 | -1.281673 | -2.609816 |
| 65 | 8 | 0 | 1.850971  | -0.967725 | -0.095550 |
| 66 | 8 | 0 | 2.184759  | -0.826153 | -2.357310 |
| 67 | 8 | 0 | 1.622197  | 1.899422  | -0.037291 |
| 68 | 8 | 0 | 1.776649  | 2.032573  | -2.315021 |
| 69 | 8 | 0 | -1.337825 | 1.569431  | -0.263289 |
| 70 | 8 | 0 | -1.197458 | 1.526116  | -2.551319 |
| 71 | 6 | 0 | -1.125875 | -1.773836 | -1.522314 |
| 72 | 6 | 0 | -1.929650 | -3.079774 | -1.570431 |
| 73 | 1 | 0 | -1.296245 | -3.804739 | -1.047526 |

|     |   |   |           |           |           |
|-----|---|---|-----------|-----------|-----------|
| 74  | 6 | 0 | -2.253702 | -3.670281 | -2.978954 |
| 75  | 6 | 0 | -3.122307 | -4.937265 | -2.774619 |
| 76  | 1 | 0 | -3.246127 | -5.447406 | -3.736027 |
| 77  | 1 | 0 | -4.115562 | -4.671209 | -2.397289 |
| 78  | 1 | 0 | -2.652619 | -5.627726 | -2.064985 |
| 79  | 6 | 0 | -3.009693 | -2.680423 | -3.893927 |
| 80  | 1 | 0 | -2.412487 | -1.781775 | -4.050966 |
| 81  | 1 | 0 | -3.971477 | -2.392017 | -3.460640 |
| 82  | 1 | 0 | -3.197211 | -3.162422 | -4.860780 |
| 83  | 6 | 0 | -0.919274 | -4.094183 | -3.644281 |
| 84  | 1 | 0 | -0.296055 | -3.219332 | -3.831041 |
| 85  | 1 | 0 | -1.134722 | -4.595750 | -4.594498 |
| 86  | 1 | 0 | -0.364838 | -4.781009 | -2.996317 |
| 87  | 6 | 0 | 2.456946  | -1.299378 | -1.191896 |
| 88  | 6 | 0 | 3.582458  | -2.317742 | -0.957399 |
| 89  | 1 | 0 | 4.348014  | -1.744116 | -0.421555 |
| 90  | 6 | 0 | 4.253059  | -2.964442 | -2.199086 |
| 91  | 6 | 0 | 3.246805  | -3.652223 | -3.148572 |
| 92  | 1 | 0 | 2.704561  | -4.453843 | -2.641824 |
| 93  | 1 | 0 | 3.792503  | -4.077966 | -3.998885 |
| 94  | 1 | 0 | 2.521463  | -2.925065 | -3.518549 |
| 95  | 6 | 0 | 5.283642  | -4.002385 | -1.690640 |
| 96  | 1 | 0 | 4.778997  | -4.855116 | -1.224918 |
| 97  | 1 | 0 | 5.958114  | -3.551957 | -0.952823 |
| 98  | 1 | 0 | 5.877077  | -4.369561 | -2.535041 |
| 99  | 6 | 0 | 5.008275  | -1.844699 | -2.960875 |
| 100 | 1 | 0 | 5.731065  | -1.348726 | -2.302672 |
| 101 | 1 | 0 | 4.303114  | -1.098662 | -3.330932 |
| 102 | 1 | 0 | 5.547182  | -2.283245 | -3.808217 |
| 103 | 6 | 0 | 2.160542  | 2.349832  | -1.129605 |
| 104 | 6 | 0 | 3.319729  | 3.341746  | -0.904431 |
| 105 | 1 | 0 | 2.871179  | 4.269790  | -0.521270 |
| 106 | 6 | 0 | 4.169613  | 3.730378  | -2.151661 |
| 107 | 6 | 0 | 3.271024  | 4.570965  | -3.094488 |
| 108 | 1 | 0 | 2.909321  | 5.471509  | -2.582422 |
| 109 | 1 | 0 | 2.416601  | 3.980371  | -3.430336 |
| 110 | 1 | 0 | 3.853943  | 4.883507  | -3.968001 |
| 111 | 6 | 0 | 5.341648  | 4.617039  | -1.661619 |
| 112 | 1 | 0 | 4.979456  | 5.429065  | -1.020704 |
| 113 | 1 | 0 | 5.855778  | 5.047586  | -2.527735 |
| 114 | 1 | 0 | 6.061935  | 4.021558  | -1.091647 |
| 115 | 6 | 0 | 4.733845  | 2.508775  | -2.912247 |
| 116 | 1 | 0 | 3.920438  | 1.890981  | -3.295750 |
| 117 | 1 | 0 | 5.357335  | 1.891595  | -2.261639 |

|     |   |   |           |           |           |
|-----|---|---|-----------|-----------|-----------|
| 118 | 1 | 0 | 5.341844  | 2.864098  | -3.752517 |
| 119 | 6 | 0 | -1.811556 | 1.794765  | -1.448735 |
| 120 | 6 | 0 | -3.257330 | 2.309148  | -1.497726 |
| 121 | 1 | 0 | -3.857584 | 1.406288  | -1.313420 |
| 122 | 6 | 0 | -3.749459 | 2.929460  | -2.844403 |
| 123 | 6 | 0 | -3.894284 | 1.780001  | -3.875793 |
| 124 | 1 | 0 | -2.920765 | 1.331564  | -4.076520 |
| 125 | 1 | 0 | -4.308624 | 2.179781  | -4.808323 |
| 126 | 1 | 0 | -4.565010 | 1.001863  | -3.494294 |
| 127 | 6 | 0 | -5.149969 | 3.544998  | -2.601254 |
| 128 | 1 | 0 | -5.082284 | 4.432969  | -1.964428 |
| 129 | 1 | 0 | -5.816902 | 2.819685  | -2.120633 |
| 130 | 1 | 0 | -5.584075 | 3.841935  | -3.562072 |
| 131 | 6 | 0 | -2.793193 | 4.011744  | -3.394539 |
| 132 | 1 | 0 | -1.821715 | 3.568823  | -3.623926 |
| 133 | 1 | 0 | -2.642028 | 4.815649  | -2.670448 |
| 134 | 1 | 0 | -3.218277 | 4.434367  | -4.312583 |
| 135 | 6 | 0 | -3.558929 | 0.191207  | 2.871272  |
| 136 | 6 | 0 | -3.592835 | -1.163302 | 3.215447  |
| 137 | 6 | 0 | -2.423503 | -1.932687 | 3.253308  |
| 138 | 6 | 0 | -1.220462 | -1.310116 | 2.953308  |
| 139 | 6 | 0 | -1.183869 | 0.061624  | 2.618391  |
| 140 | 6 | 0 | -2.344994 | 0.818012  | 2.566431  |
| 141 | 7 | 0 | 0.077840  | -1.828635 | 2.943440  |
| 142 | 6 | 0 | 1.049688  | -0.867499 | 2.663815  |
| 143 | 6 | 0 | 0.226739  | 0.372353  | 2.345360  |
| 144 | 8 | 0 | 2.270595  | -1.014776 | 2.704408  |
| 145 | 1 | 0 | -4.481701 | 0.751118  | 2.791014  |
| 146 | 1 | 0 | -4.542475 | -1.636563 | 3.426783  |
| 147 | 1 | 0 | -2.458937 | -2.985969 | 3.502349  |
| 148 | 1 | 0 | -2.314714 | 1.853432  | 2.257252  |
| 149 | 1 | 0 | 0.313377  | -2.803815 | 3.086731  |
| 150 | 7 | 0 | 0.769158  | 1.572997  | 2.522520  |
| 151 | 7 | 0 | 1.279630  | 2.587054  | 2.592598  |

-----

**C5:**

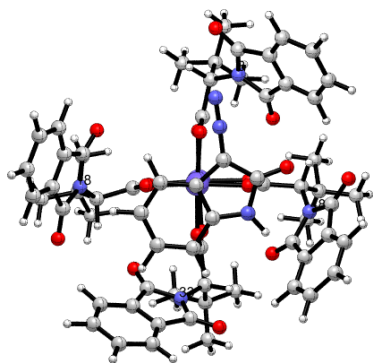

**E= -4334.4406062 a.u. (E<sub>rel</sub>=3.2 kcal/mol)**

| Center<br>Number | Atomic<br>Number | Atomic<br>Type | Coordinates (Angstroms) |           |           |
|------------------|------------------|----------------|-------------------------|-----------|-----------|
| Z                |                  |                | X                       | Y         | Z         |
| 1                | 45               | 0              | -0.006905               | -0.343846 | -0.072449 |
| 2                | 45               | 0              | -0.154979               | -0.525362 | -2.469930 |
| 3                | 7                | 0              | -3.708656               | -3.187906 | 0.086877  |
| 4                | 8                | 0              | -4.002792               | -1.020296 | -0.746473 |
| 5                | 8                | 0              | -3.841802               | -5.128745 | 1.402880  |
| 6                | 6                | 0              | -4.222668               | -1.880232 | 0.111889  |
| 7                | 6                | 0              | -5.053558               | -1.793329 | 1.344075  |
| 8                | 6                | 0              | -5.697963               | -0.702619 | 1.904536  |
| 9                | 1                | 0              | -5.625422               | 0.291343  | 1.479479  |
| 10               | 6                | 0              | -6.409930               | -0.927259 | 3.095405  |
| 11               | 1                | 0              | -6.925365               | -0.099487 | 3.566913  |
| 12               | 6                | 0              | -6.447766               | -2.192127 | 3.693028  |
| 13               | 1                | 0              | -7.004371               | -2.330645 | 4.612396  |
| 14               | 6                | 0              | -5.753671               | -3.276930 | 3.132733  |
| 15               | 1                | 0              | -5.746322               | -4.252026 | 3.604021  |
| 16               | 6                | 0              | -5.061271               | -3.050464 | 1.957629  |
| 17               | 6                | 0              | -4.166618               | -3.964476 | 1.186759  |
| 18               | 7                | 0              | 4.047233                | -2.724099 | -0.078054 |
| 19               | 8                | 0              | 2.284922                | -4.286705 | -0.037523 |
| 20               | 8                | 0              | 5.861184                | -1.374910 | 0.549886  |
| 21               | 6                | 0              | 3.250834                | -3.745032 | 0.493947  |
| 22               | 6                | 0              | 3.850638                | -3.995864 | 1.840757  |
| 23               | 6                | 0              | 3.484069                | -4.902078 | 2.819527  |
| 24               | 1                | 0              | 2.643217                | -5.568851 | 2.671777  |
| 25               | 6                | 0              | 4.241277                | -4.922770 | 4.002000  |
| 26               | 1                | 0              | 3.983045                | -5.618535 | 4.791257  |
| 27               | 6                | 0              | 5.328035                | -4.057041 | 4.175909  |
| 28               | 1                | 0              | 5.896924                | -4.095053 | 5.097130  |
| 29               | 6                | 0              | 5.689914                | -3.143133 | 3.173282  |

|    |   |   |           |           |           |
|----|---|---|-----------|-----------|-----------|
| 30 | 1 | 0 | 6.531039  | -2.471737 | 3.295932  |
| 31 | 6 | 0 | 4.933801  | -3.131672 | 2.014319  |
| 32 | 6 | 0 | 5.059950  | -2.281849 | 0.791297  |
| 33 | 7 | 0 | 2.973584  | 3.202649  | -0.624779 |
| 34 | 8 | 0 | 3.951183  | 1.175989  | -1.283340 |
| 35 | 8 | 0 | 2.244187  | 4.989903  | 0.716325  |
| 36 | 6 | 0 | 3.901145  | 2.141280  | -0.519396 |
| 37 | 6 | 0 | 4.729439  | 2.459285  | 0.679143  |
| 38 | 6 | 0 | 5.773445  | 1.750103  | 1.247416  |
| 39 | 1 | 0 | 6.086473  | 0.794541  | 0.842265  |
| 40 | 6 | 0 | 6.351030  | 2.285404  | 2.411714  |
| 41 | 1 | 0 | 7.172298  | 1.762445  | 2.887367  |
| 42 | 6 | 0 | 5.875346  | 3.475230  | 2.977134  |
| 43 | 1 | 0 | 6.339689  | 3.861260  | 3.876838  |
| 44 | 6 | 0 | 4.793086  | 4.163700  | 2.404316  |
| 45 | 1 | 0 | 4.399763  | 5.070408  | 2.847725  |
| 46 | 6 | 0 | 4.239640  | 3.636622  | 1.252087  |
| 47 | 6 | 0 | 3.046154  | 4.084423  | 0.470314  |
| 48 | 7 | 0 | -3.247863 | 2.962163  | -0.222784 |
| 49 | 8 | 0 | -1.121232 | 3.598102  | -0.980142 |
| 50 | 8 | 0 | -5.186466 | 2.689797  | 1.074103  |
| 51 | 6 | 0 | -2.027655 | 3.649536  | -0.143331 |
| 52 | 6 | 0 | -2.080464 | 4.412873  | 1.135571  |
| 53 | 6 | 0 | -1.104700 | 5.200769  | 1.728005  |
| 54 | 1 | 0 | -0.129367 | 5.331624  | 1.267992  |
| 55 | 6 | 0 | -1.419491 | 5.774952  | 2.971957  |
| 56 | 1 | 0 | -0.687642 | 6.397253  | 3.472804  |
| 57 | 6 | 0 | -2.661653 | 5.547757  | 3.579719  |
| 58 | 1 | 0 | -2.873640 | 6.001297  | 4.540571  |
| 59 | 6 | 0 | -3.626037 | 4.723931  | 2.975568  |
| 60 | 1 | 0 | -4.574430 | 4.516040  | 3.454754  |
| 61 | 6 | 0 | -3.312010 | 4.163329  | 1.750915  |
| 62 | 6 | 0 | -4.080418 | 3.195222  | 0.902072  |
| 63 | 8 | 0 | -1.188701 | -2.042090 | 0.071968  |
| 64 | 8 | 0 | -1.208661 | -2.270925 | -2.204404 |
| 65 | 8 | 0 | 1.766152  | -1.375306 | -0.175792 |
| 66 | 8 | 0 | 1.662799  | -1.474717 | -2.461454 |
| 67 | 8 | 0 | 1.049670  | 1.375716  | -0.359815 |
| 68 | 8 | 0 | 0.819842  | 1.271797  | -2.637684 |
| 69 | 8 | 0 | -1.715150 | 0.783927  | -0.146992 |
| 70 | 8 | 0 | -1.910670 | 0.529325  | -2.413144 |
| 71 | 6 | 0 | -1.624050 | -2.583281 | -1.023017 |
| 72 | 6 | 0 | -2.692443 | -3.689657 | -0.856924 |
| 73 | 1 | 0 | -2.210949 | -4.513034 | -0.311300 |

|     |   |   |           |           |           |
|-----|---|---|-----------|-----------|-----------|
| 74  | 6 | 0 | -3.281530 | -4.291369 | -2.172373 |
| 75  | 6 | 0 | -4.383712 | -5.309694 | -1.783316 |
| 76  | 1 | 0 | -4.686327 | -5.867663 | -2.676193 |
| 77  | 1 | 0 | -5.264294 | -4.792467 | -1.388116 |
| 78  | 1 | 0 | -4.027675 | -6.012822 | -1.023521 |
| 79  | 6 | 0 | -3.896097 | -3.225498 | -3.108708 |
| 80  | 1 | 0 | -3.128813 | -2.532965 | -3.454471 |
| 81  | 1 | 0 | -4.674097 | -2.653099 | -2.597137 |
| 82  | 1 | 0 | -4.344137 | -3.729982 | -3.972933 |
| 83  | 6 | 0 | -2.145617 | -5.053652 | -2.900281 |
| 84  | 1 | 0 | -1.339168 | -4.369217 | -3.167881 |
| 85  | 1 | 0 | -2.543503 | -5.511147 | -3.812845 |
| 86  | 1 | 0 | -1.746307 | -5.852052 | -2.262238 |
| 87  | 6 | 0 | 2.278639  | -1.629872 | -1.335388 |
| 88  | 6 | 0 | 3.757833  | -2.036476 | -1.344035 |
| 89  | 1 | 0 | 4.296069  | -1.079719 | -1.263908 |
| 90  | 6 | 0 | 4.284225  | -2.769195 | -2.620808 |
| 91  | 6 | 0 | 3.381772  | -3.948643 | -3.048793 |
| 92  | 1 | 0 | 3.261666  | -4.671547 | -2.238678 |
| 93  | 1 | 0 | 3.831764  | -4.451022 | -3.913005 |
| 94  | 1 | 0 | 2.393194  | -3.578383 | -3.328715 |
| 95  | 6 | 0 | 5.713386  | -3.285246 | -2.320545 |
| 96  | 1 | 0 | 5.689272  | -4.110776 | -1.601797 |
| 97  | 1 | 0 | 6.338553  | -2.483273 | -1.911243 |
| 98  | 1 | 0 | 6.166657  | -3.649125 | -3.248918 |
| 99  | 6 | 0 | 4.374017  | -1.729465 | -3.767740 |
| 100 | 1 | 0 | 5.040186  | -0.904632 | -3.487675 |
| 101 | 1 | 0 | 3.385487  | -1.324695 | -3.987892 |
| 102 | 1 | 0 | 4.774569  | -2.213852 | -4.665454 |
| 103 | 6 | 0 | 1.208698  | 1.852586  | -1.554225 |
| 104 | 6 | 0 | 1.863264  | 3.237831  | -1.588582 |
| 105 | 1 | 0 | 1.113543  | 3.894623  | -1.130642 |
| 106 | 6 | 0 | 2.228857  | 3.833632  | -2.979115 |
| 107 | 6 | 0 | 0.906587  | 4.097952  | -3.744619 |
| 108 | 1 | 0 | 0.236678  | 4.730150  | -3.151180 |
| 109 | 1 | 0 | 0.396934  | 3.156762  | -3.954954 |
| 110 | 1 | 0 | 1.130146  | 4.606436  | -4.689258 |
| 111 | 6 | 0 | 2.938681  | 5.188940  | -2.737542 |
| 112 | 1 | 0 | 2.339466  | 5.834363  | -2.084567 |
| 113 | 1 | 0 | 3.085704  | 5.696506  | -3.697016 |
| 114 | 1 | 0 | 3.918551  | 5.036339  | -2.273363 |
| 115 | 6 | 0 | 3.146367  | 2.913702  | -3.815283 |
| 116 | 1 | 0 | 2.655989  | 1.955404  | -3.993312 |
| 117 | 1 | 0 | 4.096800  | 2.730001  | -3.307583 |

|     |   |   |           |           |           |
|-----|---|---|-----------|-----------|-----------|
| 118 | 1 | 0 | 3.352519  | 3.395936  | -4.778145 |
| 119 | 6 | 0 | -2.296475 | 1.013709  | -1.283493 |
| 120 | 6 | 0 | -3.541920 | 1.908338  | -1.207123 |
| 121 | 1 | 0 | -4.295895 | 1.276036  | -0.726626 |
| 122 | 6 | 0 | -4.143182 | 2.419514  | -2.550405 |
| 123 | 6 | 0 | -4.714093 | 1.199136  | -3.318079 |
| 124 | 1 | 0 | -3.911747 | 0.513135  | -3.591808 |
| 125 | 1 | 0 | -5.217380 | 1.548332  | -4.226744 |
| 126 | 1 | 0 | -5.439604 | 0.658254  | -2.699514 |
| 127 | 6 | 0 | -5.312689 | 3.377078  | -2.209138 |
| 128 | 1 | 0 | -4.935910 | 4.308670  | -1.773810 |
| 129 | 1 | 0 | -6.003007 | 2.915761  | -1.494413 |
| 130 | 1 | 0 | -5.858293 | 3.621616  | -3.126757 |
| 131 | 6 | 0 | -3.115300 | 3.162712  | -3.432819 |
| 132 | 1 | 0 | -2.290167 | 2.498138  | -3.693181 |
| 133 | 1 | 0 | -2.708699 | 4.036366  | -2.917047 |
| 134 | 1 | 0 | -3.610060 | 3.497330  | -4.352313 |
| 135 | 6 | 0 | 2.489071  | -0.387519 | 2.926236  |
| 136 | 6 | 0 | 2.605046  | 1.008344  | 2.928031  |
| 137 | 6 | 0 | 1.479865  | 1.834178  | 2.834380  |
| 138 | 6 | 0 | 0.230272  | 1.234629  | 2.755978  |
| 139 | 6 | 0 | 0.104944  | -0.181863 | 2.756043  |
| 140 | 6 | 0 | 1.235692  | -0.996685 | 2.840753  |
| 141 | 7 | 0 | -1.039423 | 1.798499  | 2.728276  |
| 142 | 6 | 0 | -2.062307 | 0.834907  | 2.724565  |
| 143 | 6 | 0 | -1.324054 | -0.451937 | 2.799287  |
| 144 | 8 | 0 | -3.274883 | 1.069658  | 2.677922  |
| 145 | 1 | 0 | 3.376945  | -1.003959 | 2.984060  |
| 146 | 1 | 0 | 3.585492  | 1.460110  | 2.994533  |
| 147 | 1 | 0 | 1.580237  | 2.912345  | 2.818982  |
| 148 | 1 | 0 | 1.141330  | -2.076414 | 2.831355  |
| 149 | 1 | 0 | -1.236218 | 2.781587  | 2.584560  |
| 150 | 7 | 0 | -1.868208 | -1.622490 | 2.920081  |
| 151 | 7 | 0 | -2.317710 | -2.673112 | 3.040471  |

---

C6:

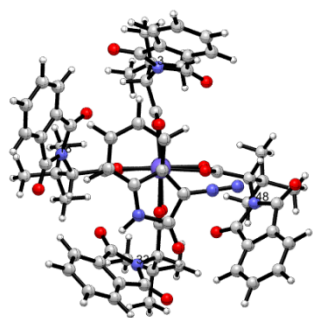

**E= -4334.4405931 a.u. (E<sub>rel</sub>=3.2 kcal/mol)**

| Center<br>Number<br>Z | Atomic<br>Number | Atomic<br>Type | Coordinates (Angstroms) |           |           |
|-----------------------|------------------|----------------|-------------------------|-----------|-----------|
|                       |                  |                | X                       | Y         | Z         |
| 1                     | 45               | 0              | -0.007429               | -0.341699 | -0.074191 |
| 2                     | 45               | 0              | -0.154785               | -0.520346 | -2.471727 |
| 3                     | 7                | 0              | 4.040277                | -2.730479 | -0.079679 |
| 4                     | 8                | 0              | 2.273096                | -4.287749 | -0.047319 |
| 5                     | 8                | 0              | 5.855686                | -1.387237 | 0.556882  |
| 6                     | 6                | 0              | 3.239109                | -3.750131 | 0.488060  |
| 7                     | 6                | 0              | 3.834065                | -4.005286 | 1.836182  |
| 8                     | 6                | 0              | 3.461574                | -4.911902 | 2.812373  |
| 9                     | 1                | 0              | 2.619084                | -5.575794 | 2.660975  |
| 10                    | 6                | 0              | 4.214936                | -4.936705 | 3.997206  |
| 11                    | 1                | 0              | 3.952031                | -5.632849 | 4.784585  |
| 12                    | 6                | 0              | 5.303810                | -4.074603 | 4.175925  |
| 13                    | 1                | 0              | 5.869587                | -4.115812 | 5.098922  |
| 14                    | 6                | 0              | 5.671698                | -3.160252 | 3.175909  |
| 15                    | 1                | 0              | 6.514395                | -2.491517 | 3.302261  |
| 16                    | 6                | 0              | 4.919280                | -3.144676 | 2.014576  |
| 17                    | 6                | 0              | 5.051451                | -2.292717 | 0.793647  |
| 18                    | 7                | 0              | 2.977988                | 3.200492  | -0.622185 |
| 19                    | 8                | 0              | 3.951260                | 1.173283  | -1.285880 |
| 20                    | 8                | 0              | 2.252419                | 4.985229  | 0.724400  |
| 21                    | 6                | 0              | 3.903727                | 2.137241  | -0.520010 |
| 22                    | 6                | 0              | 4.733942                | 2.451163  | 0.678160  |
| 23                    | 6                | 0              | 5.776982                | 1.738537  | 1.243797  |
| 24                    | 1                | 0              | 6.087377                | 0.782977  | 0.836721  |
| 25                    | 6                | 0              | 6.356869                | 2.270090  | 2.408734  |
| 26                    | 1                | 0              | 7.177583                | 1.744368  | 2.882274  |
| 27                    | 6                | 0              | 5.884030                | 3.459516  | 2.977288  |
| 28                    | 1                | 0              | 6.349944                | 3.842591  | 3.877448  |
| 29                    | 6                | 0              | 4.802518                | 4.151474  | 2.407093  |
| 30                    | 1                | 0              | 4.411295                | 5.057773  | 2.853183  |
| 31                    | 6                | 0              | 4.246963                | 3.628172  | 1.254228  |



|    |   |   |           |           |           |
|----|---|---|-----------|-----------|-----------|
| 32 | 6 | 0 | 3.052994  | 4.079407  | 0.475108  |
| 33 | 7 | 0 | -3.245983 | 2.965470  | -0.220343 |
| 34 | 8 | 0 | -1.119303 | 3.601277  | -0.978083 |
| 35 | 8 | 0 | -5.183364 | 2.691565  | 1.078024  |
| 36 | 6 | 0 | -2.025168 | 3.651926  | -0.140631 |
| 37 | 6 | 0 | -2.076541 | 4.413184  | 1.139565  |
| 38 | 6 | 0 | -1.099773 | 5.199281  | 1.732737  |
| 39 | 1 | 0 | -0.124493 | 5.329955  | 1.272561  |
| 40 | 6 | 0 | -1.413301 | 5.771579  | 2.977877  |
| 41 | 1 | 0 | -0.680595 | 6.392381  | 3.479328  |
| 42 | 6 | 0 | -2.655212 | 5.544282  | 3.586108  |
| 43 | 1 | 0 | -2.866187 | 5.996314  | 4.547891  |
| 44 | 6 | 0 | -3.620600 | 4.722141  | 2.981240  |
| 45 | 1 | 0 | -4.568783 | 4.514047  | 3.460759  |
| 46 | 6 | 0 | -3.307837 | 4.163454  | 1.755385  |
| 47 | 6 | 0 | -4.077371 | 3.196976  | 0.905575  |
| 48 | 7 | 0 | -3.708205 | -3.185466 | 0.083039  |
| 49 | 8 | 0 | -4.003754 | -1.016154 | -0.745521 |
| 50 | 8 | 0 | -3.838551 | -5.128777 | 1.395611  |
| 51 | 6 | 0 | -4.222015 | -1.877799 | 0.111561  |
| 52 | 6 | 0 | -5.050881 | -1.793403 | 1.345274  |
| 53 | 6 | 0 | -5.694898 | -0.703920 | 1.908490  |
| 54 | 1 | 0 | -5.623264 | 0.290704  | 1.484872  |
| 55 | 6 | 0 | -6.404940 | -0.930847 | 3.100082  |
| 56 | 1 | 0 | -6.920076 | -0.104111 | 3.573733  |
| 57 | 6 | 0 | -6.441218 | -2.196691 | 3.695714  |
| 58 | 1 | 0 | -6.996324 | -2.336982 | 4.615720  |
| 59 | 6 | 0 | -5.747577 | -3.280294 | 3.132528  |
| 60 | 1 | 0 | -5.739202 | -4.256178 | 3.602168  |
| 61 | 6 | 0 | -5.057161 | -3.051609 | 1.956676  |
| 62 | 6 | 0 | -4.163971 | -3.964138 | 1.182399  |
| 63 | 8 | 0 | 1.764272  | -1.374739 | -0.177442 |
| 64 | 8 | 0 | 1.662658  | -1.470356 | -2.463421 |
| 65 | 8 | 0 | 1.050591  | 1.377093  | -0.359116 |
| 66 | 8 | 0 | 0.820418  | 1.276849  | -2.637127 |
| 67 | 8 | 0 | -1.714691 | 0.786916  | -0.147525 |
| 68 | 8 | 0 | -1.910731 | 0.534267  | -2.413863 |
| 69 | 8 | 0 | -1.190270 | -2.039054 | 0.067952  |
| 70 | 8 | 0 | -1.208467 | -2.266226 | -2.208604 |
| 71 | 6 | 0 | 2.277144  | -1.628601 | -1.337092 |
| 72 | 6 | 0 | 3.755311  | -2.038888 | -1.344502 |
| 73 | 1 | 0 | 4.295737  | -1.083656 | -1.261132 |
| 74 | 6 | 0 | 4.282173  | -2.769561 | -2.622141 |
| 75 | 6 | 0 | 5.710002  | -3.288688 | -2.320856 |

|     |   |   |           |           |           |
|-----|---|---|-----------|-----------|-----------|
| 76  | 1 | 0 | 6.164081  | -3.651460 | -3.249271 |
| 77  | 1 | 0 | 5.683369  | -4.115619 | -1.603806 |
| 78  | 1 | 0 | 6.335937  | -2.488645 | -1.908930 |
| 79  | 6 | 0 | 3.378356  | -3.946458 | -3.054185 |
| 80  | 1 | 0 | 2.390710  | -3.573921 | -3.334391 |
| 81  | 1 | 0 | 3.256042  | -4.671271 | -2.246111 |
| 82  | 1 | 0 | 3.828602  | -4.447384 | -3.919115 |
| 83  | 6 | 0 | 4.375324  | -1.727317 | -3.766527 |
| 84  | 1 | 0 | 3.387674  | -1.320892 | -3.987567 |
| 85  | 1 | 0 | 4.776988  | -2.210119 | -4.664586 |
| 86  | 1 | 0 | 5.041809  | -0.903841 | -3.483287 |
| 87  | 6 | 0 | 1.210059  | 1.855528  | -1.552792 |
| 88  | 6 | 0 | 1.866758  | 3.239804  | -1.584831 |
| 89  | 1 | 0 | 1.118567  | 3.896815  | -1.124741 |
| 90  | 6 | 0 | 2.232005  | 3.838069  | -2.974349 |
| 91  | 6 | 0 | 3.148281  | 2.919046  | -3.812851 |
| 92  | 1 | 0 | 4.099031  | 2.733902  | -3.306252 |
| 93  | 1 | 0 | 3.353975  | 3.402853  | -4.775019 |
| 94  | 1 | 0 | 2.657190  | 1.961356  | -3.992173 |
| 95  | 6 | 0 | 2.943076  | 5.192309  | -2.730448 |
| 96  | 1 | 0 | 3.922911  | 5.037979  | -2.266772 |
| 97  | 1 | 0 | 2.344576  | 5.837043  | -2.076133 |
| 98  | 1 | 0 | 3.090317  | 5.701539  | -3.689011 |
| 99  | 6 | 0 | 0.909478  | 4.104933  | -3.738543 |
| 100 | 1 | 0 | 0.239914  | 4.735477  | -3.142972 |
| 101 | 1 | 0 | 0.399552  | 3.164456  | -3.951378 |
| 102 | 1 | 0 | 1.132775  | 4.616127  | -4.681780 |
| 103 | 6 | 0 | -2.296151 | 1.017828  | -1.283673 |
| 104 | 6 | 0 | -3.541213 | 1.912860  | -1.205739 |
| 105 | 1 | 0 | -4.295055 | 1.280313  | -0.725284 |
| 106 | 6 | 0 | -4.143077 | 2.425677  | -2.548029 |
| 107 | 6 | 0 | -4.714896 | 1.206232  | -3.316520 |
| 108 | 1 | 0 | -5.440581 | 0.665323  | -2.698178 |
| 109 | 1 | 0 | -3.912981 | 0.519997  | -3.590945 |
| 110 | 1 | 0 | -5.218196 | 1.556404  | -4.224801 |
| 111 | 6 | 0 | -5.311951 | 3.383366  | -2.205036 |
| 112 | 1 | 0 | -6.002013 | 2.921555  | -1.490375 |
| 113 | 1 | 0 | -5.858025 | 3.629152  | -3.122041 |
| 114 | 1 | 0 | -4.934469 | 4.314301  | -1.768909 |
| 115 | 6 | 0 | -3.115406 | 3.169332  | -3.430335 |
| 116 | 1 | 0 | -2.290739 | 2.504642  | -3.691879 |
| 117 | 1 | 0 | -2.708075 | 4.042257  | -2.913905 |
| 118 | 1 | 0 | -3.610576 | 3.505127  | -4.349175 |
| 119 | 6 | 0 | -1.624844 | -2.579376 | -1.027761 |

|     |   |   |           |           |           |
|-----|---|---|-----------|-----------|-----------|
| 120 | 6 | 0 | -2.693624 | -3.685465 | -0.863292 |
| 121 | 1 | 0 | -2.212086 | -4.510674 | -0.320441 |
| 122 | 6 | 0 | -3.284673 | -4.283309 | -2.179669 |
| 123 | 6 | 0 | -2.150481 | -5.045691 | -2.910143 |
| 124 | 1 | 0 | -1.343091 | -4.361913 | -3.176586 |
| 125 | 1 | 0 | -2.549689 | -5.500318 | -3.823563 |
| 126 | 1 | 0 | -1.752087 | -5.846273 | -2.274270 |
| 127 | 6 | 0 | -4.388054 | -5.300804 | -1.791869 |
| 128 | 1 | 0 | -5.267644 | -4.783119 | -1.395068 |
| 129 | 1 | 0 | -4.032422 | -6.005879 | -1.033670 |
| 130 | 1 | 0 | -4.692038 | -5.856663 | -2.685596 |
| 131 | 6 | 0 | -3.898149 | -3.214352 | -3.113179 |
| 132 | 1 | 0 | -3.129844 | -2.522548 | -3.458189 |
| 133 | 1 | 0 | -4.674514 | -2.641438 | -2.599746 |
| 134 | 1 | 0 | -4.347891 | -3.716135 | -3.978096 |
| 135 | 6 | 0 | 2.494830  | -0.378178 | 2.930055  |
| 136 | 6 | 0 | 2.606304  | 1.018027  | 2.933058  |
| 137 | 6 | 0 | 1.478549  | 1.840231  | 2.838893  |
| 138 | 6 | 0 | 0.230990  | 1.236725  | 2.759458  |
| 139 | 6 | 0 | 0.110042  | -0.180094 | 2.758980  |
| 140 | 6 | 0 | 1.243343  | -0.991297 | 2.843493  |
| 141 | 7 | 0 | -1.040261 | 1.796874  | 2.730441  |
| 142 | 6 | 0 | -2.060302 | 0.830468  | 2.725090  |
| 143 | 6 | 0 | -1.318384 | -0.454423 | 2.799783  |
| 144 | 8 | 0 | -3.273451 | 1.061968  | 2.676963  |
| 145 | 1 | 0 | 3.384712  | -0.991776 | 2.988061  |
| 146 | 1 | 0 | 3.584796  | 1.473661  | 3.001210  |
| 147 | 1 | 0 | 1.575578  | 2.918738  | 2.823459  |
| 148 | 1 | 0 | 1.152524  | -2.071316 | 2.833307  |
| 149 | 1 | 0 | -1.239699 | 2.779427  | 2.586978  |
| 150 | 7 | 0 | -1.859899 | -1.626483 | 2.918184  |
| 151 | 7 | 0 | -2.308026 | -2.677972 | 3.035932  |

C7:

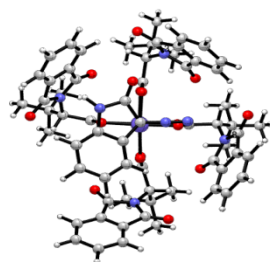

**E= -4334.4451766 a.u. ( $E_{\text{rel}}=0.4$  kcal/mol)**

Center      Atomic      Atomic      Coordinates (Angstroms)

| Number<br>Z | Number | Type | X         | Y         |           |
|-------------|--------|------|-----------|-----------|-----------|
| 1           | 45     | 0    | 0.080613  | 0.104942  | -0.124221 |
| 2           | 45     | 0    | 0.137845  | 0.026308  | -2.544911 |
| 3           | 7      | 0    | 4.090165  | -2.007502 | 0.045233  |
| 4           | 8      | 0    | 2.306302  | -3.391614 | -0.598507 |
| 5           | 8      | 0    | 5.648482  | -0.824136 | 1.339431  |
| 6           | 6      | 0    | 3.115207  | -3.006220 | 0.250781  |
| 7           | 6      | 0    | 3.284106  | -3.448877 | 1.661423  |
| 8           | 6      | 0    | 2.570671  | -4.392497 | 2.381867  |
| 9           | 1      | 0    | 1.734842  | -4.928889 | 1.945297  |
| 10          | 6      | 0    | 2.947409  | -4.591759 | 3.720808  |
| 11          | 1      | 0    | 2.415467  | -5.321128 | 4.320010  |
| 12          | 6      | 0    | 3.992914  | -3.859168 | 4.295562  |
| 13          | 1      | 0    | 4.260178  | -4.035240 | 5.330895  |
| 14          | 6      | 0    | 4.688041  | -2.888709 | 3.555868  |
| 15          | 1      | 0    | 5.480194  | -2.298362 | 3.999218  |
| 16          | 6      | 0    | 4.312702  | -2.699711 | 2.239270  |
| 17          | 6      | 0    | 4.807505  | -1.717395 | 1.229035  |
| 18          | 7      | 0    | 2.546157  | 3.940381  | -0.290270 |
| 19          | 8      | 0    | 3.666758  | 1.994575  | -0.979500 |
| 20          | 8      | 0    | 1.715116  | 5.689359  | 1.041357  |
| 21          | 6      | 0    | 3.479038  | 2.887418  | -0.152272 |
| 22          | 6      | 0    | 4.137692  | 3.103419  | 1.168500  |
| 23          | 6      | 0    | 5.059871  | 2.318056  | 1.839706  |
| 24          | 1      | 0    | 5.407415  | 1.371491  | 1.442209  |
| 25          | 6      | 0    | 5.478468  | 2.766011  | 3.105557  |
| 26          | 1      | 0    | 6.196932  | 2.176820  | 3.662044  |
| 27          | 6      | 0    | 4.966258  | 3.940267  | 3.669108  |
| 28          | 1      | 0    | 5.306530  | 4.255312  | 4.648267  |
| 29          | 6      | 0    | 3.995100  | 4.699922  | 2.994631  |
| 30          | 1      | 0    | 3.565163  | 5.592052  | 3.433801  |
| 31          | 6      | 0    | 3.597370  | 4.258779  | 1.744187  |
| 32          | 6      | 0    | 2.519718  | 4.776717  | 0.848000  |
| 33          | 7      | 0    | -4.574473 | 1.310750  | -0.435226 |
| 34          | 8      | 0    | -3.399094 | 3.227836  | -1.112659 |
| 35          | 8      | 0    | -5.863448 | -0.200593 | 0.820063  |
| 36          | 6      | 0    | -4.224316 | 2.680360  | -0.386354 |
| 37          | 6      | 0    | -5.061646 | 3.254061  | 0.711920  |
| 38          | 6      | 0    | -5.153756 | 4.554742  | 1.171919  |
| 39          | 1      | 0    | -4.574892 | 5.347271  | 0.713867  |
| 40          | 6      | 0    | -6.015191 | 4.802127  | 2.252795  |
| 41          | 1      | 0    | -6.115727 | 5.809586  | 2.638644  |

|    |   |   |           |           |           |
|----|---|---|-----------|-----------|-----------|
| 42 | 6 | 0 | -6.746570 | 3.763328  | 2.843138  |
| 43 | 1 | 0 | -7.401992 | 3.980835  | 3.677963  |
| 44 | 6 | 0 | -6.641669 | 2.446637  | 2.366240  |
| 45 | 1 | 0 | -7.201882 | 1.635108  | 2.814476  |
| 46 | 6 | 0 | -5.795616 | 2.219495  | 1.295454  |
| 47 | 6 | 0 | -5.464905 | 0.944481  | 0.587226  |
| 48 | 7 | 0 | -1.706305 | -4.147216 | -0.021866 |
| 49 | 8 | 0 | -3.231104 | -2.565337 | -0.834834 |
| 50 | 8 | 0 | -0.457253 | -5.513950 | 1.421959  |
| 51 | 6 | 0 | -2.841396 | -3.315719 | 0.063660  |
| 52 | 6 | 0 | -3.401292 | -3.534270 | 1.425018  |
| 53 | 6 | 0 | -4.495105 | -2.943263 | 2.035024  |
| 54 | 1 | 0 | -5.081450 | -2.183156 | 1.528835  |
| 55 | 6 | 0 | -4.779015 | -3.337923 | 3.353685  |
| 56 | 1 | 0 | -5.626082 | -2.900936 | 3.868971  |
| 57 | 6 | 0 | -3.983060 | -4.280618 | 4.016029  |
| 58 | 1 | 0 | -4.228469 | -4.564646 | 5.032544  |
| 59 | 6 | 0 | -2.863059 | -4.850668 | 3.388695  |
| 60 | 1 | 0 | -2.228070 | -5.562930 | 3.901026  |
| 61 | 6 | 0 | -2.591378 | -4.459877 | 2.090363  |
| 62 | 6 | 0 | -1.449263 | -4.819650 | 1.194390  |
| 63 | 8 | 0 | 2.046361  | -0.394447 | -0.170494 |
| 64 | 8 | 0 | 2.144299  | -0.433443 | -2.457469 |
| 65 | 8 | 0 | 0.612406  | 2.079392  | -0.242685 |
| 66 | 8 | 0 | 0.616132  | 2.038769  | -2.534650 |
| 67 | 8 | 0 | -1.949835 | 0.492119  | -0.245622 |
| 68 | 8 | 0 | -1.879690 | 0.369897  | -2.534488 |
| 69 | 8 | 0 | -0.372742 | -1.877329 | -0.136500 |
| 70 | 8 | 0 | -0.259284 | -1.996083 | -2.420320 |
| 71 | 6 | 0 | 2.658986  | -0.612689 | -1.291961 |
| 72 | 6 | 0 | 4.105569  | -1.093028 | -1.110596 |
| 73 | 1 | 0 | 4.643188  | -0.206743 | -0.753239 |
| 74 | 6 | 0 | 4.853384  | -1.621818 | -2.368053 |
| 75 | 6 | 0 | 6.237455  | -2.141242 | -1.906495 |
| 76 | 1 | 0 | 6.846879  | -2.380472 | -2.784751 |
| 77 | 1 | 0 | 6.129254  | -3.047106 | -1.301414 |
| 78 | 1 | 0 | 6.758875  | -1.384740 | -1.308092 |
| 79 | 6 | 0 | 4.093456  | -2.749744 | -3.101194 |
| 80 | 1 | 0 | 3.121726  | -2.387539 | -3.441559 |
| 81 | 1 | 0 | 3.931660  | -3.610107 | -2.448231 |
| 82 | 1 | 0 | 4.681379  | -3.069826 | -3.969566 |
| 83 | 6 | 0 | 5.065516  | -0.423856 | -3.329326 |
| 84 | 1 | 0 | 4.102523  | -0.039406 | -3.669186 |
| 85 | 1 | 0 | 5.649018  | -0.753608 | -4.196223 |

|     |   |   |           |           |           |
|-----|---|---|-----------|-----------|-----------|
| 86  | 1 | 0 | 5.610180  | 0.384233  | -2.826633 |
| 87  | 6 | 0 | 0.862537  | 2.600878  | -1.401733 |
| 88  | 6 | 0 | 1.490410  | 4.008845  | -1.323798 |
| 89  | 1 | 0 | 0.729848  | 4.658623  | -0.869315 |
| 90  | 6 | 0 | 1.930489  | 4.674365  | -2.659930 |
| 91  | 6 | 0 | 2.910135  | 3.808041  | -3.483359 |
| 92  | 1 | 0 | 3.810586  | 3.573244  | -2.911049 |
| 93  | 1 | 0 | 3.200251  | 4.361157  | -4.384388 |
| 94  | 1 | 0 | 2.432272  | 2.872028  | -3.775515 |
| 95  | 6 | 0 | 2.604173  | 6.025778  | -2.314750 |
| 96  | 1 | 0 | 3.567055  | 5.862060  | -1.819978 |
| 97  | 1 | 0 | 1.969490  | 6.624802  | -1.651132 |
| 98  | 1 | 0 | 2.781005  | 6.587829  | -3.238166 |
| 99  | 6 | 0 | 0.649693  | 4.952267  | -3.487553 |
| 100 | 1 | 0 | -0.032020 | 5.611930  | -2.936350 |
| 101 | 1 | 0 | 0.136085  | 4.016183  | -3.715443 |
| 102 | 1 | 0 | 0.924038  | 5.447008  | -4.425836 |
| 103 | 6 | 0 | -2.512877 | 0.443764  | -1.411464 |
| 104 | 6 | 0 | -4.045295 | 0.347228  | -1.407896 |
| 105 | 1 | 0 | -4.238889 | -0.636432 | -0.961242 |
| 106 | 6 | 0 | -4.771344 | 0.375875  | -2.792215 |
| 107 | 6 | 0 | -4.399447 | -0.921504 | -3.556944 |
| 108 | 1 | 0 | -4.628711 | -1.805649 | -2.953152 |
| 109 | 1 | 0 | -3.334390 | -0.929219 | -3.791107 |
| 110 | 1 | 0 | -4.974071 | -0.966970 | -4.488948 |
| 111 | 6 | 0 | -6.298166 | 0.358689  | -2.526644 |
| 112 | 1 | 0 | -6.569973 | -0.461278 | -1.852189 |
| 113 | 1 | 0 | -6.826446 | 0.225679  | -3.476811 |
| 114 | 1 | 0 | -6.629120 | 1.302622  | -2.080512 |
| 115 | 6 | 0 | -4.415270 | 1.609929  | -3.652332 |
| 116 | 1 | 0 | -3.344367 | 1.624931  | -3.859613 |
| 117 | 1 | 0 | -4.685608 | 2.541766  | -3.149898 |
| 118 | 1 | 0 | -4.964201 | 1.552017  | -4.599946 |
| 119 | 6 | 0 | -0.433617 | -2.524653 | -1.261419 |
| 120 | 6 | 0 | -0.686567 | -4.028944 | -1.080842 |
| 121 | 1 | 0 | 0.238157  | -4.396837 | -0.618814 |
| 122 | 6 | 0 | -0.949509 | -4.880360 | -2.353274 |
| 123 | 6 | 0 | 0.352466  | -4.884751 | -3.195443 |
| 124 | 1 | 0 | 0.579465  | -3.876848 | -3.546614 |
| 125 | 1 | 0 | 0.222446  | -5.546670 | -4.058932 |
| 126 | 1 | 0 | 1.197936  | -5.244770 | -2.598027 |
| 127 | 6 | 0 | -1.248645 | -6.328389 | -1.892620 |
| 128 | 1 | 0 | -2.211461 | -6.377418 | -1.373488 |
| 129 | 1 | 0 | -0.469073 | -6.692085 | -1.213018 |

|     |   |   |           |           |           |
|-----|---|---|-----------|-----------|-----------|
| 130 | 1 | 0 | -1.292635 | -6.986115 | -2.767461 |
| 131 | 6 | 0 | -2.125283 | -4.355092 | -3.206040 |
| 132 | 1 | 0 | -1.924618 | -3.335107 | -3.538264 |
| 133 | 1 | 0 | -3.059435 | -4.358700 | -2.638691 |
| 134 | 1 | 0 | -2.245400 | -5.000932 | -4.083810 |
| 135 | 6 | 0 | -2.652282 | 2.606893  | 2.989684  |
| 136 | 6 | 0 | -1.849245 | 3.751662  | 3.036495  |
| 137 | 6 | 0 | -0.457778 | 3.669967  | 2.906741  |
| 138 | 6 | 0 | 0.105605  | 2.412012  | 2.743915  |
| 139 | 6 | 0 | -0.706866 | 1.259261  | 2.640119  |
| 140 | 6 | 0 | -2.086432 | 1.346329  | 2.764280  |
| 141 | 7 | 0 | 1.450970  | 2.040886  | 2.674203  |
| 142 | 6 | 0 | 1.636058  | 0.668872  | 2.524114  |
| 143 | 6 | 0 | 0.215842  | 0.147022  | 2.382167  |
| 144 | 8 | 0 | 2.704534  | 0.058165  | 2.546863  |
| 145 | 1 | 0 | -3.723703 | 2.699372  | 3.101774  |
| 146 | 1 | 0 | -2.311935 | 4.722041  | 3.171677  |
| 147 | 1 | 0 | 0.157902  | 4.561067  | 2.897625  |
| 148 | 1 | 0 | -2.707159 | 0.463273  | 2.670510  |
| 149 | 1 | 0 | 2.234567  | 2.682030  | 2.696765  |
| 150 | 7 | 0 | -0.038340 | -1.136072 | 2.571971  |
| 151 | 7 | 0 | -0.207138 | -2.259920 | 2.667146  |

C8:

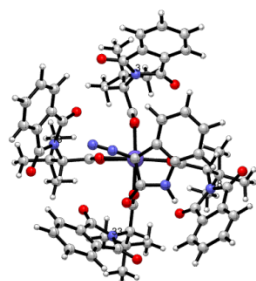

**E= -4334.4444109 a.u. (E<sub>rel</sub>=0.8 kcal/mol)**

| Center<br>Number | Atomic<br>Number | Atomic<br>Type | Coordinates (Angstroms) |           |           |
|------------------|------------------|----------------|-------------------------|-----------|-----------|
|                  |                  |                | X                       | Y         | Z         |
| 1                | 45               | 0              | -0.078519               | -0.169719 | -0.109085 |
| 2                | 45               | 0              | -0.150927               | -0.061102 | -2.527139 |
| 3                | 7                | 0              | 4.236607                | -2.228223 | -0.373640 |
| 4                | 8                | 0              | 2.767962                | -3.973853 | -0.937893 |
| 5                | 8                | 0              | 5.789933                | -0.879237 | 0.761052  |
| 6                | 6                | 0              | 3.652428                | -3.507260 | -0.224849 |
| 7                | 6                | 0              | 4.344220                | -4.113158 | 0.955841  |

|    |   |   |           |           |           |
|----|---|---|-----------|-----------|-----------|
| 8  | 6 | 0 | 4.203931  | -5.369075 | 1.520027  |
| 9  | 1 | 0 | 3.508919  | -6.088846 | 1.104358  |
| 10 | 6 | 0 | 4.996876  | -5.671094 | 2.639117  |
| 11 | 1 | 0 | 4.916546  | -6.645660 | 3.105633  |
| 12 | 6 | 0 | 5.894435  | -4.730567 | 3.160109  |
| 13 | 1 | 0 | 6.494121  | -4.988983 | 4.024592  |
| 14 | 6 | 0 | 6.029355  | -3.461731 | 2.575214  |
| 15 | 1 | 0 | 6.723869  | -2.728434 | 2.966456  |
| 16 | 6 | 0 | 5.244501  | -3.178326 | 1.471491  |
| 17 | 6 | 0 | 5.174203  | -1.940579 | 0.634306  |
| 18 | 7 | 0 | 2.611648  | 3.663425  | -0.092602 |
| 19 | 8 | 0 | 3.751084  | 1.771303  | -0.862705 |
| 20 | 8 | 0 | 1.771519  | 5.369817  | 1.284969  |
| 21 | 6 | 0 | 3.589655  | 2.654324  | -0.015834 |
| 22 | 6 | 0 | 4.317259  | 2.897011  | 1.260291  |
| 23 | 6 | 0 | 5.352194  | 2.181518  | 1.836598  |
| 24 | 1 | 0 | 5.730946  | 1.276260  | 1.374591  |
| 25 | 6 | 0 | 5.841366  | 2.648135  | 3.069055  |
| 26 | 1 | 0 | 6.652682  | 2.118897  | 3.554589  |
| 27 | 6 | 0 | 5.292575  | 3.778905  | 3.685431  |
| 28 | 1 | 0 | 5.691358  | 4.114470  | 4.635462  |
| 29 | 6 | 0 | 4.221308  | 4.473825  | 3.099443  |
| 30 | 1 | 0 | 3.773339  | 5.334427  | 3.580936  |
| 31 | 6 | 0 | 3.750682  | 4.012959  | 1.884352  |
| 32 | 6 | 0 | 2.598822  | 4.485149  | 1.055574  |
| 33 | 7 | 0 | -3.483237 | 2.848314  | 0.112446  |
| 34 | 8 | 0 | -1.466378 | 3.778554  | -0.635933 |
| 35 | 8 | 0 | -5.189041 | 2.053986  | 1.515095  |
| 36 | 6 | 0 | -2.322335 | 3.636836  | 0.242795  |
| 37 | 6 | 0 | -2.379272 | 4.215060  | 1.611927  |
| 38 | 6 | 0 | -1.482977 | 5.050532  | 2.255826  |
| 39 | 1 | 0 | -0.556442 | 5.361879  | 1.784893  |
| 40 | 6 | 0 | -1.797693 | 5.432500  | 3.570889  |
| 41 | 1 | 0 | -1.123434 | 6.086570  | 4.110882  |
| 42 | 6 | 0 | -2.962187 | 4.974640  | 4.198352  |
| 43 | 1 | 0 | -3.178132 | 5.286540  | 5.213478  |
| 44 | 6 | 0 | -3.843073 | 4.101658  | 3.539397  |
| 45 | 1 | 0 | -4.730169 | 3.718159  | 4.028121  |
| 46 | 6 | 0 | -3.528883 | 3.735196  | 2.245068  |
| 47 | 6 | 0 | -4.210650 | 2.778924  | 1.322530  |
| 48 | 7 | 0 | -3.443931 | -3.310902 | -0.313172 |
| 49 | 8 | 0 | -3.999825 | -1.105065 | -0.885830 |
| 50 | 8 | 0 | -3.263727 | -5.355923 | 0.830616  |
| 51 | 6 | 0 | -4.061022 | -2.062142 | -0.112395 |



|    |   |   |           |           |           |
|----|---|---|-----------|-----------|-----------|
| 52 | 6 | 0 | -4.783908 | -2.172925 | 1.189626  |
| 53 | 6 | 0 | -5.483473 | -1.210668 | 1.903096  |
| 54 | 1 | 0 | -5.551691 | -0.181202 | 1.565417  |
| 55 | 6 | 0 | -6.052091 | -1.611433 | 3.125570  |
| 56 | 1 | 0 | -6.600274 | -0.887478 | 3.716272  |
| 57 | 6 | 0 | -5.918283 | -2.925100 | 3.594426  |
| 58 | 1 | 0 | -6.374812 | -3.203795 | 4.536634  |
| 59 | 6 | 0 | -5.187498 | -3.879232 | 2.867581  |
| 60 | 1 | 0 | -5.061349 | -4.893149 | 3.228201  |
| 61 | 6 | 0 | -4.621525 | -3.474253 | 1.671197  |
| 62 | 6 | 0 | -3.720259 | -4.218969 | 0.737622  |
| 63 | 8 | 0 | 1.804727  | -1.012860 | -0.240258 |
| 64 | 8 | 0 | 1.739060  | -0.871648 | -2.528264 |
| 65 | 8 | 0 | 0.831813  | 1.661097  | -0.129496 |
| 66 | 8 | 0 | 0.711684  | 1.801019  | -2.412455 |
| 67 | 8 | 0 | -1.874409 | 0.771945  | -0.112440 |
| 68 | 8 | 0 | -1.987085 | 0.868415  | -2.397891 |
| 69 | 8 | 0 | -1.090786 | -1.960001 | -0.233719 |
| 70 | 8 | 0 | -1.096911 | -1.894750 | -2.523750 |
| 71 | 6 | 0 | 2.357063  | -1.070308 | -1.413044 |
| 72 | 6 | 0 | 3.880926  | -1.258436 | -1.417767 |
| 73 | 1 | 0 | 4.256533  | -0.298124 | -1.037666 |
| 74 | 6 | 0 | 4.570744  | -1.505870 | -2.797879 |
| 75 | 6 | 0 | 6.068622  | -1.803371 | -2.535542 |
| 76 | 1 | 0 | 6.603598  | -1.819505 | -3.491171 |
| 77 | 1 | 0 | 6.197049  | -2.778627 | -2.054112 |
| 78 | 1 | 0 | 6.514030  | -1.034353 | -1.894057 |
| 79 | 6 | 0 | 3.946105  | -2.669855 | -3.601107 |
| 80 | 1 | 0 | 2.901567  | -2.448106 | -3.826419 |
| 81 | 1 | 0 | 3.988051  | -3.609546 | -3.045510 |
| 82 | 1 | 0 | 4.497652  | -2.790441 | -4.541171 |
| 83 | 6 | 0 | 4.474553  | -0.192260 | -3.617571 |
| 84 | 1 | 0 | 3.431326  | 0.039877  | -3.835208 |
| 85 | 1 | 0 | 5.021205  | -0.313188 | -4.559704 |
| 86 | 1 | 0 | 4.908482  | 0.644041  | -3.058775 |
| 87 | 6 | 0 | 1.007898  | 2.282853  | -1.257161 |
| 88 | 6 | 0 | 1.552808  | 3.710572  | -1.113129 |
| 89 | 1 | 0 | 0.727546  | 4.258652  | -0.642408 |
| 90 | 6 | 0 | 1.940099  | 4.468982  | -2.416869 |
| 91 | 6 | 0 | 2.963029  | 3.702296  | -3.284466 |
| 92 | 1 | 0 | 3.892488  | 3.523034  | -2.737351 |
| 93 | 1 | 0 | 3.192711  | 4.297633  | -4.176173 |
| 94 | 1 | 0 | 2.550155  | 2.740899  | -3.593623 |
| 95 | 6 | 0 | 2.537777  | 5.837785  | -2.005335 |

|     |   |   |           |           |           |
|-----|---|---|-----------|-----------|-----------|
| 96  | 1 | 0 | 3.514029  | 5.706406  | -1.527011 |
| 97  | 1 | 0 | 1.875525  | 6.360739  | -1.306089 |
| 98  | 1 | 0 | 2.671524  | 6.456817  | -2.899065 |
| 99  | 6 | 0 | 0.641193  | 4.720185  | -3.225642 |
| 100 | 1 | 0 | -0.096801 | 5.252779  | -2.615482 |
| 101 | 1 | 0 | 0.205657  | 3.772634  | -3.545321 |
| 102 | 1 | 0 | 0.875505  | 5.326359  | -4.107987 |
| 103 | 6 | 0 | -2.434677 | 1.139364  | -1.222325 |
| 104 | 6 | 0 | -3.736272 | 1.922962  | -1.005534 |
| 105 | 1 | 0 | -4.430027 | 1.180562  | -0.596964 |
| 106 | 6 | 0 | -4.412777 | 2.560218  | -2.251375 |
| 107 | 6 | 0 | -4.876744 | 1.408017  | -3.179991 |
| 108 | 1 | 0 | -5.524476 | 0.710046  | -2.636892 |
| 109 | 1 | 0 | -4.013773 | 0.858728  | -3.559046 |
| 110 | 1 | 0 | -5.438080 | 1.825998  | -4.023271 |
| 111 | 6 | 0 | -5.659868 | 3.335971  | -1.760752 |
| 112 | 1 | 0 | -6.299234 | 2.696124  | -1.140675 |
| 113 | 1 | 0 | -6.236752 | 3.681929  | -2.625366 |
| 114 | 1 | 0 | -5.364398 | 4.207933  | -1.168466 |
| 115 | 6 | 0 | -3.481316 | 3.515396  | -3.031226 |
| 116 | 1 | 0 | -2.588201 | 2.982330  | -3.361671 |
| 117 | 1 | 0 | -3.171309 | 4.362045  | -2.413864 |
| 118 | 1 | 0 | -4.016903 | 3.897981  | -3.908194 |
| 119 | 6 | 0 | -1.471493 | -2.390268 | -1.394327 |
| 120 | 6 | 0 | -2.432073 | -3.601612 | -1.350412 |
| 121 | 1 | 0 | -1.858874 | -4.437741 | -0.926711 |
| 122 | 6 | 0 | -3.021918 | -4.085231 | -2.709644 |
| 123 | 6 | 0 | -1.852956 | -4.649017 | -3.557541 |
| 124 | 1 | 0 | -1.118878 | -3.867321 | -3.760627 |
| 125 | 1 | 0 | -2.244025 | -5.026554 | -4.508770 |
| 126 | 1 | 0 | -1.360938 | -5.478892 | -3.034717 |
| 127 | 6 | 0 | -4.017998 | -5.235183 | -2.416247 |
| 128 | 1 | 0 | -4.916682 | -4.850645 | -1.922552 |
| 129 | 1 | 0 | -3.567040 | -5.996030 | -1.769619 |
| 130 | 1 | 0 | -4.317787 | -5.701142 | -3.361010 |
| 131 | 6 | 0 | -3.751195 | -2.967223 | -3.488286 |
| 132 | 1 | 0 | -3.056887 | -2.163312 | -3.733231 |
| 133 | 1 | 0 | -4.573842 | -2.549997 | -2.902130 |
| 134 | 1 | 0 | -4.159576 | -3.387766 | -4.414716 |
| 135 | 6 | 0 | 1.097936  | -3.897618 | 2.777356  |
| 136 | 6 | 0 | -0.169963 | -4.412380 | 3.060130  |
| 137 | 6 | 0 | -1.297884 | -3.582878 | 3.094499  |
| 138 | 6 | 0 | -1.126214 | -2.229664 | 2.841741  |
| 139 | 6 | 0 | 0.156454  | -1.708348 | 2.556141  |

|     |   |   |           |           |          |
|-----|---|---|-----------|-----------|----------|
| 140 | 6 | 0 | 1.270387  | -2.532958 | 2.512971 |
| 141 | 7 | 0 | -2.064261 | -1.189576 | 2.839395 |
| 142 | 6 | 0 | -1.491559 | 0.061730  | 2.615596 |
| 143 | 6 | 0 | -0.038305 | -0.272395 | 2.310751 |
| 144 | 8 | 0 | -2.043597 | 1.157172  | 2.686869 |
| 145 | 1 | 0 | 1.957560  | -4.553777 | 2.747541 |
| 146 | 1 | 0 | -0.290770 | -5.472015 | 3.251196 |
| 147 | 1 | 0 | -2.276316 | -3.989827 | 3.309490 |
| 148 | 1 | 0 | 2.239530  | -2.135066 | 2.242470 |
| 149 | 1 | 0 | -3.065859 | -1.299830 | 2.949772 |
| 150 | 7 | 0 | 0.886205  | 0.662030  | 2.496559 |
| 151 | 7 | 0 | 1.639933  | 1.511085  | 2.577303 |

C9:

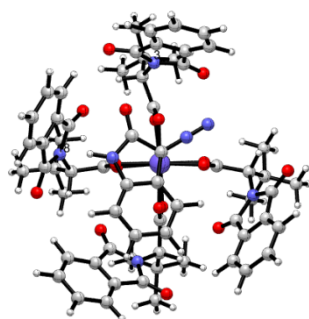

**E= -4334.4430481 a.u. (E<sub>rel</sub>=1.7 kcal/mol)**

| Center<br>Number | Atomic<br>Number | Atomic<br>Type | Coordinates (Angstroms) |           |           |
|------------------|------------------|----------------|-------------------------|-----------|-----------|
|                  |                  |                | X                       | Y         | Z         |
| 1                | 45               | 0              | 0.061038                | -0.432660 | -0.137559 |
| 2                | 45               | 0              | -0.068871               | -0.721146 | -2.529675 |
| 3                | 7                | 0              | 4.452424                | -1.958002 | -0.033261 |
| 4                | 8                | 0              | 3.134798                | -3.906216 | -0.098510 |
| 5                | 8                | 0              | 5.800962                | -0.188985 | 0.707673  |
| 6                | 6                | 0              | 3.891094                | -3.140423 | 0.497037  |
| 7                | 6                | 0              | 4.415925                | -3.229382 | 1.893204  |
| 8                | 6                | 0              | 4.204090                | -4.198276 | 2.857933  |
| 9                | 1                | 0              | 3.577210                | -5.057477 | 2.653034  |
| 10               | 6                | 0              | 4.828236                | -4.022054 | 4.102904  |
| 11               | 1                | 0              | 4.686451                | -4.760468 | 4.883054  |
| 12               | 6                | 0              | 5.633483                | -2.903460 | 4.350992  |
| 13               | 1                | 0              | 6.104661                | -2.791181 | 5.320286  |
| 14               | 6                | 0              | 5.836008                | -1.926911 | 3.363017  |
| 15               | 1                | 0              | 6.453115                | -1.055954 | 3.545839  |
| 16               | 6                | 0              | 5.213625                | -2.111509 | 2.141961  |
| 17               | 6                | 0              | 5.229719                | -1.260363 | 0.914918  |

|    |   |   |           |           |           |
|----|---|---|-----------|-----------|-----------|
| 18 | 7 | 0 | 2.197589  | 3.641627  | -0.739654 |
| 19 | 8 | 0 | 3.642204  | 1.843547  | -1.156225 |
| 20 | 8 | 0 | 1.000671  | 5.355637  | 0.329654  |
| 21 | 6 | 0 | 3.272802  | 2.769100  | -0.434768 |
| 22 | 6 | 0 | 3.787185  | 3.225812  | 0.887240  |
| 23 | 6 | 0 | 4.797787  | 2.697569  | 1.671965  |
| 24 | 1 | 0 | 5.337690  | 1.810723  | 1.360885  |
| 25 | 6 | 0 | 5.044444  | 3.328838  | 2.903113  |
| 26 | 1 | 0 | 5.829385  | 2.949920  | 3.546485  |
| 27 | 6 | 0 | 4.280778  | 4.423963  | 3.326330  |
| 28 | 1 | 0 | 4.492930  | 4.884351  | 4.284064  |
| 29 | 6 | 0 | 3.233361  | 4.923194  | 2.533540  |
| 30 | 1 | 0 | 2.624745  | 5.759380  | 2.856334  |
| 31 | 6 | 0 | 3.008645  | 4.307017  | 1.313530  |
| 32 | 6 | 0 | 1.941931  | 4.557877  | 0.295636  |
| 33 | 7 | 0 | -3.762790 | 2.233119  | -0.411779 |
| 34 | 8 | 0 | -1.810325 | 3.183724  | -1.293361 |
| 35 | 8 | 0 | -5.528481 | 1.676265  | 1.032749  |
| 36 | 6 | 0 | -2.721671 | 3.180312  | -0.462321 |
| 37 | 6 | 0 | -2.989898 | 4.125758  | 0.657062  |
| 38 | 6 | 0 | -2.265621 | 5.230398  | 1.069975  |
| 39 | 1 | 0 | -1.317394 | 5.485529  | 0.608780  |
| 40 | 6 | 0 | -2.782876 | 5.965097  | 2.150611  |
| 41 | 1 | 0 | -2.251697 | 6.841799  | 2.501980  |
| 42 | 6 | 0 | -3.974123 | 5.583823  | 2.781481  |
| 43 | 1 | 0 | -4.354821 | 6.177558  | 3.604363  |
| 44 | 6 | 0 | -4.673915 | 4.436089  | 2.372521  |
| 45 | 1 | 0 | -5.582397 | 4.119324  | 2.870554  |
| 46 | 6 | 0 | -4.157769 | 3.719264  | 1.308347  |
| 47 | 6 | 0 | -4.621395 | 2.437913  | 0.688254  |
| 48 | 7 | 0 | -2.943944 | -3.846730 | 0.332221  |
| 49 | 8 | 0 | -3.797750 | -1.900766 | -0.658610 |
| 50 | 8 | 0 | -2.408151 | -5.524841 | 1.883607  |
| 51 | 6 | 0 | -3.715289 | -2.671084 | 0.301156  |
| 52 | 6 | 0 | -4.377395 | -2.583873 | 1.634196  |
| 53 | 6 | 0 | -5.219115 | -1.608229 | 2.145454  |
| 54 | 1 | 0 | -5.467392 | -0.711658 | 1.586344  |
| 55 | 6 | 0 | -5.699953 | -1.801367 | 3.452055  |
| 56 | 1 | 0 | -6.365177 | -1.064784 | 3.886992  |
| 57 | 6 | 0 | -5.332355 | -2.925242 | 4.202938  |
| 58 | 1 | 0 | -5.720299 | -3.044868 | 5.207482  |
| 59 | 6 | 0 | -4.459255 | -3.890973 | 3.677283  |
| 60 | 1 | 0 | -4.153824 | -4.754604 | 4.255225  |
| 61 | 6 | 0 | -3.994881 | -3.697059 | 2.388612  |

|     |   |   |           |           |           |
|-----|---|---|-----------|-----------|-----------|
| 62  | 6 | 0 | -3.033920 | -4.511233 | 1.582703  |
| 63  | 8 | 0 | 1.953207  | -1.174075 | -0.221234 |
| 64  | 8 | 0 | 1.921077  | -1.284624 | -2.503414 |
| 65  | 8 | 0 | 0.789465  | 1.442476  | -0.489336 |
| 66  | 8 | 0 | 0.562099  | 1.219335  | -2.759382 |
| 67  | 8 | 0 | -1.836378 | 0.360170  | -0.198634 |
| 68  | 8 | 0 | -1.990167 | -0.017429 | -2.456692 |
| 69  | 8 | 0 | -0.772542 | -2.291989 | 0.085806  |
| 70  | 8 | 0 | -0.794668 | -2.631557 | -2.177732 |
| 71  | 6 | 0 | 2.538193  | -1.301943 | -1.369989 |
| 72  | 6 | 0 | 4.069561  | -1.349614 | -1.314232 |
| 73  | 1 | 0 | 4.358127  | -0.292419 | -1.202364 |
| 74  | 6 | 0 | 4.809636  | -1.915333 | -2.566336 |
| 75  | 6 | 0 | 6.305693  | -2.074717 | -2.200199 |
| 76  | 1 | 0 | 6.877404  | -2.304865 | -3.105857 |
| 77  | 1 | 0 | 6.447277  | -2.890802 | -1.484535 |
| 78  | 1 | 0 | 6.696921  | -1.151213 | -1.757549 |
| 79  | 6 | 0 | 4.235878  | -3.270439 | -3.039097 |
| 80  | 1 | 0 | 3.202425  | -3.142096 | -3.369986 |
| 81  | 1 | 0 | 4.248416  | -4.007716 | -2.233499 |
| 82  | 1 | 0 | 4.834410  | -3.642838 | -3.878724 |
| 83  | 6 | 0 | 4.691164  | -0.868892 | -3.704469 |
| 84  | 1 | 0 | 3.643171  | -0.715287 | -3.966802 |
| 85  | 1 | 0 | 5.234016  | -1.227221 | -4.586510 |
| 86  | 1 | 0 | 5.122519  | 0.089734  | -3.392707 |
| 87  | 6 | 0 | 0.844786  | 1.899650  | -1.702373 |
| 88  | 6 | 0 | 1.218385  | 3.383805  | -1.806546 |
| 89  | 1 | 0 | 0.308365  | 3.905023  | -1.481795 |
| 90  | 6 | 0 | 1.603068  | 3.937620  | -3.209662 |
| 91  | 6 | 0 | 2.721601  | 3.125176  | -3.899040 |
| 92  | 1 | 0 | 3.630293  | 3.106529  | -3.292890 |
| 93  | 1 | 0 | 2.951797  | 3.583839  | -4.867915 |
| 94  | 1 | 0 | 2.393488  | 2.096589  | -4.061533 |
| 95  | 6 | 0 | 2.064307  | 5.404591  | -3.022655 |
| 96  | 1 | 0 | 3.021040  | 5.446573  | -2.492093 |
| 97  | 1 | 0 | 1.324119  | 5.976616  | -2.450727 |
| 98  | 1 | 0 | 2.191929  | 5.872082  | -4.005004 |
| 99  | 6 | 0 | 0.326722  | 3.930147  | -4.090480 |
| 100 | 1 | 0 | -0.476142 | 4.502861  | -3.611772 |
| 101 | 1 | 0 | -0.019083 | 2.907134  | -4.244259 |
| 102 | 1 | 0 | 0.553600  | 4.384732  | -5.061253 |
| 103 | 6 | 0 | -2.452054 | 0.424402  | -1.336475 |
| 104 | 6 | 0 | -3.853305 | 1.047421  | -1.276549 |
| 105 | 1 | 0 | -4.446893 | 0.324062  | -0.709162 |

|     |   |   |           |           |           |
|-----|---|---|-----------|-----------|-----------|
| 106 | 6 | 0 | -4.586090 | 1.298268  | -2.629221 |
| 107 | 6 | 0 | -4.872931 | -0.076366 | -3.286637 |
| 108 | 1 | 0 | -5.430060 | -0.724262 | -2.600788 |
| 109 | 1 | 0 | -3.938143 | -0.572375 | -3.548050 |
| 110 | 1 | 0 | -5.470119 | 0.076019  | -4.192799 |
| 111 | 6 | 0 | -5.940047 | 1.982823  | -2.314072 |
| 112 | 1 | 0 | -6.498956 | 1.420734  | -1.557249 |
| 113 | 1 | 0 | -6.538358 | 2.038405  | -3.229897 |
| 114 | 1 | 0 | -5.782933 | 3.001469  | -1.943861 |
| 115 | 6 | 0 | -3.777211 | 2.189642  | -3.598309 |
| 116 | 1 | 0 | -2.811401 | 1.731202  | -3.814470 |
| 117 | 1 | 0 | -3.605871 | 3.183290  | -3.175111 |
| 118 | 1 | 0 | -4.339534 | 2.303018  | -4.532739 |
| 119 | 6 | 0 | -1.111362 | -2.959124 | -0.974944 |
| 120 | 6 | 0 | -1.936653 | -4.229145 | -0.678449 |
| 121 | 1 | 0 | -1.270743 | -4.911248 | -0.131246 |
| 122 | 6 | 0 | -2.496723 | -5.017565 | -1.899879 |
| 123 | 6 | 0 | -1.287927 | -5.615889 | -2.663667 |
| 124 | 1 | 0 | -0.637283 | -4.818438 | -3.027806 |
| 125 | 1 | 0 | -1.650492 | -6.198303 | -3.517733 |
| 126 | 1 | 0 | -0.710284 | -6.283302 | -2.011995 |
| 127 | 6 | 0 | -3.364387 | -6.177674 | -1.352168 |
| 128 | 1 | 0 | -4.279435 | -5.789405 | -0.893044 |
| 129 | 1 | 0 | -2.818554 | -6.758434 | -0.599600 |
| 130 | 1 | 0 | -3.645364 | -6.840535 | -2.177711 |
| 131 | 6 | 0 | -3.345813 | -4.149131 | -2.855192 |
| 132 | 1 | 0 | -2.737637 | -3.350447 | -3.281524 |
| 133 | 1 | 0 | -4.193137 | -3.698289 | -2.334017 |
| 134 | 1 | 0 | -3.726795 | -4.782981 | -3.664519 |
| 135 | 6 | 0 | -2.734620 | 0.892006  | 3.628864  |
| 136 | 6 | 0 | -2.311737 | 2.212982  | 3.802922  |
| 137 | 6 | 0 | -1.002316 | 2.603489  | 3.493800  |
| 138 | 6 | 0 | -0.123504 | 1.639287  | 3.022818  |
| 139 | 6 | 0 | -0.551396 | 0.301331  | 2.845420  |
| 140 | 6 | 0 | -1.852391 | -0.079668 | 3.141222  |
| 141 | 7 | 0 | 1.230270  | 1.742706  | 2.688660  |
| 142 | 6 | 0 | 1.793513  | 0.521875  | 2.310144  |
| 143 | 6 | 0 | 0.615221  | -0.424345 | 2.336283  |
| 144 | 8 | 0 | 2.980826  | 0.305126  | 2.060353  |
| 145 | 1 | 0 | -3.755386 | 0.613459  | 3.857916  |
| 146 | 1 | 0 | -3.007401 | 2.957193  | 4.167439  |
| 147 | 1 | 0 | -0.688898 | 3.631692  | 3.621467  |
| 148 | 1 | 0 | -2.185224 | -1.097515 | 2.977892  |
| 149 | 1 | 0 | 1.769457  | 2.601520  | 2.668049  |

|     |   |   |          |           |          |
|-----|---|---|----------|-----------|----------|
| 150 | 7 | 0 | 0.794824 | -1.731163 | 2.402543 |
| 151 | 7 | 0 | 0.962802 | -2.858417 | 2.389869 |

---

**C10:**

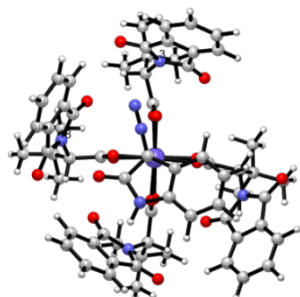

**E= -4334.442423 a.u. (E<sub>rel</sub>=2.1 kcal/mol)**

---

| Center<br>Number<br>Z | Atomic<br>Number | Atomic<br>Type | Coordinates (Angstroms) |           |           |
|-----------------------|------------------|----------------|-------------------------|-----------|-----------|
|                       |                  |                | X                       | Y         | Z         |
| 1                     | 45               | 0              | 0.064493                | -0.214882 | -0.139669 |
| 2                     | 45               | 0              | 0.006546                | -0.307805 | -2.555965 |
| 3                     | 7                | 0              | 4.011276                | -2.767369 | -0.089113 |
| 4                     | 8                | 0              | 2.227193                | -4.258228 | -0.447582 |
| 5                     | 8                | 0              | 5.746783                | -1.549230 | 0.917261  |
| 6                     | 6                | 0              | 3.146193                | -3.833411 | 0.249518  |
| 7                     | 6                | 0              | 3.598888                | -4.287755 | 1.599944  |
| 8                     | 6                | 0              | 3.121763                | -5.312594 | 2.397410  |
| 9                     | 1                | 0              | 2.296158                | -5.932862 | 2.070103  |
| 10                    | 6                | 0              | 3.747807                | -5.515972 | 3.637609  |
| 11                    | 1                | 0              | 3.401630                | -6.309778 | 4.288670  |
| 12                    | 6                | 0              | 4.815736                | -4.707205 | 4.045748  |
| 13                    | 1                | 0              | 5.281884                | -4.886004 | 5.007300  |
| 14                    | 6                | 0              | 5.288837                | -3.669949 | 3.226571  |
| 15                    | 1                | 0              | 6.113585                | -3.037862 | 3.532093  |
| 16                    | 6                | 0              | 4.663093                | -3.480555 | 2.007551  |
| 17                    | 6                | 0              | 4.925529                | -2.468603 | 0.939508  |
| 18                    | 7                | 0              | 3.047257                | 3.263571  | -0.300181 |
| 19                    | 8                | 0              | 4.077727                | 1.248382  | -0.917174 |
| 20                    | 8                | 0              | 2.190833                | 5.041637  | 0.968212  |
| 21                    | 6                | 0              | 3.886622                | 2.148661  | -0.094453 |
| 22                    | 6                | 0              | 4.435205                | 2.311125  | 1.280852  |
| 23                    | 6                | 0              | 5.309584                | 1.499392  | 1.984383  |
| 24                    | 1                | 0              | 5.683571                | 0.574685  | 1.558638  |
| 25                    | 6                | 0              | 5.648085                | 1.903398  | 3.286911  |
| 26                    | 1                | 0              | 6.330301                | 1.297809  | 3.871745  |

|    |   |   |           |           |           |
|----|---|---|-----------|-----------|-----------|
| 27 | 6 | 0 | 5.114340  | 3.071281  | 3.845061  |
| 28 | 1 | 0 | 5.394362  | 3.356694  | 4.852304  |
| 29 | 6 | 0 | 4.211200  | 3.869354  | 3.124246  |
| 30 | 1 | 0 | 3.775749  | 4.762635  | 3.554520  |
| 31 | 6 | 0 | 3.885220  | 3.467010  | 1.842611  |
| 32 | 6 | 0 | 2.935487  | 4.067286  | 0.858625  |
| 33 | 7 | 0 | -3.133433 | 3.081920  | -0.234775 |
| 34 | 8 | 0 | -0.998511 | 3.796987  | -0.905358 |
| 35 | 8 | 0 | -4.999601 | 2.538666  | 1.083888  |
| 36 | 6 | 0 | -1.896399 | 3.750345  | -0.063814 |
| 37 | 6 | 0 | -1.945219 | 4.333965  | 1.304918  |
| 38 | 6 | 0 | -0.967841 | 5.021397  | 2.004104  |
| 39 | 1 | 0 | 0.013735  | 5.198323  | 1.579605  |
| 40 | 6 | 0 | -1.285985 | 5.421887  | 3.313931  |
| 41 | 1 | 0 | -0.549896 | 5.963042  | 3.895701  |
| 42 | 6 | 0 | -2.523718 | 5.111445  | 3.889901  |
| 43 | 1 | 0 | -2.734793 | 5.429675  | 4.903933  |
| 44 | 6 | 0 | -3.487295 | 4.372913  | 3.180131  |
| 45 | 1 | 0 | -4.438656 | 4.105413  | 3.624099  |
| 46 | 6 | 0 | -3.173479 | 3.997014  | 1.884726  |
| 47 | 6 | 0 | -3.930630 | 3.134226  | 0.924327  |
| 48 | 7 | 0 | -3.639116 | -3.064093 | -0.225089 |
| 49 | 8 | 0 | -3.911517 | -0.875346 | -1.021190 |
| 50 | 8 | 0 | -3.777937 | -5.006454 | 1.089547  |
| 51 | 6 | 0 | -4.193876 | -1.772188 | -0.223187 |
| 52 | 6 | 0 | -5.176112 | -1.755823 | 0.899266  |
| 53 | 6 | 0 | -5.959046 | -0.718734 | 1.378277  |
| 54 | 1 | 0 | -5.872700 | 0.288442  | 0.985103  |
| 55 | 6 | 0 | -6.820727 | -1.010140 | 2.449133  |
| 56 | 1 | 0 | -7.452676 | -0.227163 | 2.851265  |
| 57 | 6 | 0 | -6.874908 | -2.293536 | 3.008680  |
| 58 | 1 | 0 | -7.558189 | -2.490063 | 3.826605  |
| 59 | 6 | 0 | -6.043977 | -3.322039 | 2.535226  |
| 60 | 1 | 0 | -6.056080 | -4.310859 | 2.977784  |
| 61 | 6 | 0 | -5.198719 | -3.024270 | 1.481825  |
| 62 | 6 | 0 | -4.158078 | -3.868649 | 0.820892  |
| 63 | 8 | 0 | 1.800230  | -1.296500 | -0.205521 |
| 64 | 8 | 0 | 1.831014  | -1.262101 | -2.493649 |
| 65 | 8 | 0 | 1.176447  | 1.462873  | -0.329657 |
| 66 | 8 | 0 | 1.001196  | 1.500073  | -2.611357 |
| 67 | 8 | 0 | -1.625674 | 0.935895  | -0.226980 |
| 68 | 8 | 0 | -1.747863 | 0.751567  | -2.511538 |
| 69 | 8 | 0 | -1.132229 | -1.900310 | -0.095455 |
| 70 | 8 | 0 | -1.059844 | -2.059014 | -2.380805 |



|     |   |   |           |           |           |
|-----|---|---|-----------|-----------|-----------|
| 71  | 6 | 0 | 2.380225  | -1.488823 | -1.351143 |
| 72  | 6 | 0 | 3.854881  | -1.903826 | -1.268446 |
| 73  | 1 | 0 | 4.372242  | -0.971088 | -0.997362 |
| 74  | 6 | 0 | 4.518136  | -2.446864 | -2.571714 |
| 75  | 6 | 0 | 5.934211  | -2.957775 | -2.206740 |
| 76  | 1 | 0 | 6.481121  | -3.190116 | -3.126941 |
| 77  | 1 | 0 | 5.876153  | -3.867859 | -1.600696 |
| 78  | 1 | 0 | 6.490501  | -2.198824 | -1.644803 |
| 79  | 6 | 0 | 3.707401  | -3.585858 | -3.230508 |
| 80  | 1 | 0 | 2.729791  | -3.214448 | -3.544515 |
| 81  | 1 | 0 | 3.554407  | -4.417194 | -2.538037 |
| 82  | 1 | 0 | 4.250232  | -3.950821 | -4.110269 |
| 83  | 6 | 0 | 4.664684  | -1.261851 | -3.561413 |
| 84  | 1 | 0 | 3.681503  | -0.885350 | -3.847184 |
| 85  | 1 | 0 | 5.195105  | -1.602130 | -4.458045 |
| 86  | 1 | 0 | 5.233931  | -0.444840 | -3.102987 |
| 87  | 6 | 0 | 1.380656  | 2.006037  | -1.489368 |
| 88  | 6 | 0 | 2.078204  | 3.368703  | -1.403486 |
| 89  | 1 | 0 | 1.298941  | 4.040938  | -1.019462 |
| 90  | 6 | 0 | 2.629249  | 3.984216  | -2.719947 |
| 91  | 6 | 0 | 3.567945  | 3.028648  | -3.489934 |
| 92  | 1 | 0 | 4.424919  | 2.735923  | -2.878883 |
| 93  | 1 | 0 | 3.931344  | 3.533797  | -4.392620 |
| 94  | 1 | 0 | 3.027581  | 2.125481  | -3.781160 |
| 95  | 6 | 0 | 3.392957  | 5.279496  | -2.348596 |
| 96  | 1 | 0 | 4.313025  | 5.044246  | -1.803884 |
| 97  | 1 | 0 | 2.774033  | 5.930092  | -1.719446 |
| 98  | 1 | 0 | 3.659701  | 5.819166  | -3.263840 |
| 99  | 6 | 0 | 1.416872  | 4.360076  | -3.610231 |
| 100 | 1 | 0 | 0.744819  | 5.043297  | -3.077752 |
| 101 | 1 | 0 | 0.858314  | 3.463950  | -3.885830 |
| 102 | 1 | 0 | 1.774098  | 4.855461  | -4.520004 |
| 103 | 6 | 0 | -2.161518 | 1.201614  | -1.379334 |
| 104 | 6 | 0 | -3.398111 | 2.108515  | -1.308603 |
| 105 | 1 | 0 | -4.183659 | 1.457880  | -0.908193 |
| 106 | 6 | 0 | -3.928193 | 2.717821  | -2.639413 |
| 107 | 6 | 0 | -4.491982 | 1.559883  | -3.503215 |
| 108 | 1 | 0 | -5.254357 | 0.999054  | -2.949687 |
| 109 | 1 | 0 | -3.691347 | 0.874428  | -3.783763 |
| 110 | 1 | 0 | -4.949276 | 1.973804  | -4.409001 |
| 111 | 6 | 0 | -5.088370 | 3.679340  | -2.281672 |
| 112 | 1 | 0 | -5.827743 | 3.180180  | -1.643940 |
| 113 | 1 | 0 | -5.581491 | 4.010950  | -3.201721 |
| 114 | 1 | 0 | -4.711739 | 4.560411  | -1.752331 |

|     |   |   |           |           |           |
|-----|---|---|-----------|-----------|-----------|
| 115 | 6 | 0 | -2.846489 | 3.484081  | -3.433007 |
| 116 | 1 | 0 | -2.026798 | 2.812636  | -3.693994 |
| 117 | 1 | 0 | -2.440786 | 4.314826  | -2.851316 |
| 118 | 1 | 0 | -3.291917 | 3.880576  | -4.353037 |
| 119 | 6 | 0 | -1.511302 | -2.409359 | -1.222828 |
| 120 | 6 | 0 | -2.562098 | -3.537332 | -1.116578 |
| 121 | 1 | 0 | -2.089852 | -4.351871 | -0.551048 |
| 122 | 6 | 0 | -3.076618 | -4.140322 | -2.461436 |
| 123 | 6 | 0 | -1.884542 | -4.850688 | -3.151600 |
| 124 | 1 | 0 | -1.094458 | -4.133053 | -3.376903 |
| 125 | 1 | 0 | -2.227781 | -5.310864 | -4.084800 |
| 126 | 1 | 0 | -1.481321 | -5.641393 | -2.506585 |
| 127 | 6 | 0 | -4.157479 | -5.202579 | -2.136549 |
| 128 | 1 | 0 | -5.067397 | -4.725662 | -1.756949 |
| 129 | 1 | 0 | -3.802108 | -5.916720 | -1.386296 |
| 130 | 1 | 0 | -4.412875 | -5.744166 | -3.053829 |
| 131 | 6 | 0 | -3.686542 | -3.079152 | -3.405911 |
| 132 | 1 | 0 | -2.935081 | -2.339692 | -3.681727 |
| 133 | 1 | 0 | -4.525986 | -2.563856 | -2.930817 |
| 134 | 1 | 0 | -4.053374 | -3.578650 | -4.310382 |
| 135 | 6 | 0 | -2.126227 | -2.579012 | 3.480070  |
| 136 | 6 | 0 | -3.145746 | -1.670687 | 3.783478  |
| 137 | 6 | 0 | -2.969227 | -0.292842 | 3.606229  |
| 138 | 6 | 0 | -1.745059 | 0.155637  | 3.132961  |
| 139 | 6 | 0 | -0.714392 | -0.761742 | 2.822092  |
| 140 | 6 | 0 | -0.895924 | -2.127557 | 2.987007  |
| 141 | 7 | 0 | -1.291974 | 1.460211  | 2.913150  |
| 142 | 6 | 0 | 0.034095  | 1.512618  | 2.482037  |
| 143 | 6 | 0 | 0.404402  | 0.050797  | 2.329210  |
| 144 | 8 | 0 | 0.719905  | 2.522400  | 2.314485  |
| 145 | 1 | 0 | -2.297556 | -3.642047 | 3.599455  |
| 146 | 1 | 0 | -4.099951 | -2.035372 | 4.139928  |
| 147 | 1 | 0 | -3.770079 | 0.400496  | 3.829791  |
| 148 | 1 | 0 | -0.113612 | -2.826625 | 2.715145  |
| 149 | 1 | 0 | -1.855484 | 2.298369  | 3.001565  |
| 150 | 7 | 0 | 1.675892  | -0.313755 | 2.362362  |
| 151 | 7 | 0 | 2.774989  | -0.608747 | 2.317954  |

-----

**C11:**

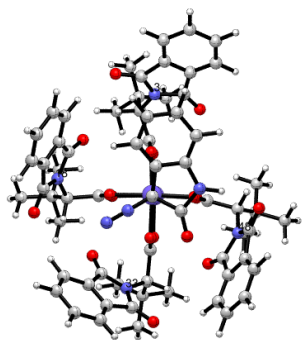

**E= -4334.4409739 a.u. (E<sub>rel</sub>=3.0 kcal/mol)**

| Center<br>Number | Atomic<br>Number | Atomic<br>Type | Coordinates (Angstroms) |           |           |
|------------------|------------------|----------------|-------------------------|-----------|-----------|
|                  |                  |                | X                       | Y         | Z         |
| 1                | 45               | 0              | -0.062180               | -0.193027 | -0.085551 |
| 2                | 45               | 0              | -0.212416               | -0.217216 | -2.502692 |
| 3                | 7                | 0              | 4.680218                | -1.020063 | -0.542988 |
| 4                | 8                | 0              | 3.640125                | -3.059200 | -1.066352 |
| 5                | 8                | 0              | 5.908309                | 0.646127  | 0.573387  |
| 6                | 6                | 0              | 4.466962                | -2.412716 | -0.427667 |
| 7                | 6                | 0              | 5.448423                | -2.870424 | 0.603937  |
| 8                | 6                | 0              | 5.706714                | -4.141186 | 1.083609  |
| 9                | 1                | 0              | 5.159337                | -4.997615 | 0.709381  |
| 10               | 6                | 0              | 6.699362                | -4.275562 | 2.067950  |
| 11               | 1                | 0              | 6.932807                | -5.256856 | 2.463707  |
| 12               | 6                | 0              | 7.396461                | -3.157536 | 2.544126  |
| 13               | 1                | 0              | 8.161211                | -3.288820 | 3.300475  |
| 14               | 6                | 0              | 7.119073                | -1.872094 | 2.051147  |
| 15               | 1                | 0              | 7.650910                | -0.999993 | 2.412017  |
| 16               | 6                | 0              | 6.140761                | -1.756255 | 1.080515  |
| 17               | 6                | 0              | 5.613318                | -0.538566 | 0.390482  |
| 18               | 7                | 0              | 1.362781                | 4.189065  | -0.169463 |
| 19               | 8                | 0              | 3.022589                | 2.751888  | -0.992174 |
| 20               | 8                | 0              | -0.006373               | 5.413110  | 1.295805  |
| 21               | 6                | 0              | 2.573080                | 3.467738  | -0.094268 |
| 22               | 6                | 0              | 3.122951                | 3.741012  | 1.260816  |
| 23               | 6                | 0              | 4.280599                | 3.264435  | 1.853906  |
| 24               | 1                | 0              | 4.934782                | 2.571302  | 1.334033  |
| 25               | 6                | 0              | 4.536456                | 3.679026  | 3.172425  |
| 26               | 1                | 0              | 5.430939                | 3.332027  | 3.675892  |
| 27               | 6                | 0              | 3.651591                | 4.526904  | 3.850774  |
| 28               | 1                | 0              | 3.876564                | 4.827433  | 4.867203  |
| 29               | 6                | 0              | 2.470943                | 4.980395  | 3.239703  |
| 30               | 1                | 0              | 1.771098                | 5.619343  | 3.764202  |

|    |   |   |           |           |           |
|----|---|---|-----------|-----------|-----------|
| 31 | 6 | 0 | 2.227595  | 4.572644  | 1.940427  |
| 32 | 6 | 0 | 1.048144  | 4.823654  | 1.053671  |
| 33 | 7 | 0 | -4.306060 | 1.676713  | 0.026938  |
| 34 | 8 | 0 | -2.565505 | 3.103836  | -0.629537 |
| 35 | 8 | 0 | -5.963934 | 0.582038  | 1.279083  |
| 36 | 6 | 0 | -3.417937 | 2.757445  | 0.192728  |
| 37 | 6 | 0 | -3.743753 | 3.342121  | 1.522847  |
| 38 | 6 | 0 | -3.149821 | 4.399963  | 2.190085  |
| 39 | 1 | 0 | -2.289852 | 4.915897  | 1.776018  |
| 40 | 6 | 0 | -3.670522 | 4.731061  | 3.451998  |
| 41 | 1 | 0 | -3.234789 | 5.551821  | 4.009064  |
| 42 | 6 | 0 | -4.735204 | 4.011291  | 4.007940  |
| 43 | 1 | 0 | -5.114195 | 4.290164  | 4.984048  |
| 44 | 6 | 0 | -5.307524 | 2.923776  | 3.327694  |
| 45 | 1 | 0 | -6.116088 | 2.347079  | 3.759685  |
| 46 | 6 | 0 | -4.793126 | 2.607438  | 2.083634  |
| 47 | 6 | 0 | -5.145209 | 1.493625  | 1.149251  |
| 48 | 7 | 0 | -2.458488 | -4.011053 | 0.009240  |
| 49 | 8 | 0 | -3.789669 | -2.364292 | -1.016541 |
| 50 | 8 | 0 | -1.339398 | -5.149942 | 1.730730  |
| 51 | 6 | 0 | -3.550958 | -3.109397 | -0.063708 |
| 52 | 6 | 0 | -4.283148 | -3.261622 | 1.225230  |
| 53 | 6 | 0 | -5.413250 | -2.612466 | 1.687836  |
| 54 | 1 | 0 | -5.894123 | -1.825428 | 1.121059  |
| 55 | 6 | 0 | -5.866008 | -2.948212 | 2.975054  |
| 56 | 1 | 0 | -6.747260 | -2.457916 | 3.370706  |
| 57 | 6 | 0 | -5.186232 | -3.884512 | 3.761288  |
| 58 | 1 | 0 | -5.558773 | -4.122292 | 4.750608  |
| 59 | 6 | 0 | -4.010031 | -4.494832 | 3.297102  |
| 60 | 1 | 0 | -3.450490 | -5.187644 | 3.913686  |
| 61 | 6 | 0 | -3.581235 | -4.164990 | 2.026145  |
| 62 | 6 | 0 | -2.336481 | -4.550553 | 1.309601  |
| 63 | 8 | 0 | 1.976150  | -0.452029 | -0.278224 |
| 64 | 8 | 0 | 1.824674  | -0.441080 | -2.565070 |
| 65 | 8 | 0 | 0.245404  | 1.817481  | -0.167815 |
| 66 | 8 | 0 | 0.066505  | 1.831238  | -2.453246 |
| 67 | 8 | 0 | -2.085986 | 0.188272  | -0.078478 |
| 68 | 8 | 0 | -2.222090 | 0.130277  | -2.363916 |
| 69 | 8 | 0 | -0.453850 | -2.186291 | -0.105701 |
| 70 | 8 | 0 | -0.620535 | -2.252212 | -2.388202 |
| 71 | 6 | 0 | 2.497367  | -0.404285 | -1.463632 |
| 72 | 6 | 0 | 4.010974  | -0.150967 | -1.518003 |
| 73 | 1 | 0 | 4.116504  | 0.863503  | -1.111859 |
| 74 | 6 | 0 | 4.683585  | -0.156743 | -2.930295 |

|     |   |   |           |           |           |
|-----|---|---|-----------|-----------|-----------|
| 75  | 6 | 0 | 6.210158  | 0.028849  | -2.733543 |
| 76  | 1 | 0 | 6.680400  | 0.182010  | -3.710814 |
| 77  | 1 | 0 | 6.658287  | -0.859062 | -2.274713 |
| 78  | 1 | 0 | 6.422322  | 0.895852  | -2.098004 |
| 79  | 6 | 0 | 4.426990  | -1.455039 | -3.729192 |
| 80  | 1 | 0 | 3.357299  | -1.584217 | -3.899092 |
| 81  | 1 | 0 | 4.804713  | -2.334001 | -3.200713 |
| 82  | 1 | 0 | 4.938929  | -1.383661 | -4.696435 |
| 83  | 6 | 0 | 4.150274  | 1.063702  | -3.725308 |
| 84  | 1 | 0 | 3.084442  | 0.948313  | -3.924674 |
| 85  | 1 | 0 | 4.688523  | 1.136138  | -4.677193 |
| 86  | 1 | 0 | 4.300428  | 1.988835  | -3.159407 |
| 87  | 6 | 0 | 0.219241  | 2.418814  | -1.319578 |
| 88  | 6 | 0 | 0.338621  | 3.945984  | -1.203046 |
| 89  | 1 | 0 | -0.605800 | 4.246072  | -0.731993 |
| 90  | 6 | 0 | 0.497310  | 4.769076  | -2.509997 |
| 91  | 6 | 0 | 1.696352  | 4.319865  | -3.373115 |
| 92  | 1 | 0 | 2.638717  | 4.433130  | -2.831653 |
| 93  | 1 | 0 | 1.735406  | 4.936617  | -4.278760 |
| 94  | 1 | 0 | 1.584275  | 3.272494  | -3.658371 |
| 95  | 6 | 0 | 0.672862  | 6.254686  | -2.108592 |
| 96  | 1 | 0 | 1.635232  | 6.410160  | -1.610147 |
| 97  | 1 | 0 | -0.126572 | 6.572308  | -1.428588 |
| 98  | 1 | 0 | 0.642141  | 6.879946  | -3.007489 |
| 99  | 6 | 0 | -0.818697 | 4.624747  | -3.317752 |
| 100 | 1 | 0 | -1.679240 | 4.929099  | -2.710888 |
| 101 | 1 | 0 | -0.961574 | 3.587842  | -3.626165 |
| 102 | 1 | 0 | -0.770555 | 5.261937  | -4.207861 |
| 103 | 6 | 0 | -2.731151 | 0.316368  | -1.196775 |
| 104 | 6 | 0 | -4.214920 | 0.686144  | -1.057014 |
| 105 | 1 | 0 | -4.687722 | -0.217773 | -0.657845 |
| 106 | 6 | 0 | -4.982037 | 1.076012  | -2.357314 |
| 107 | 6 | 0 | -5.069913 | -0.178322 | -3.264861 |
| 108 | 1 | 0 | -5.499520 | -1.024397 | -2.717426 |
| 109 | 1 | 0 | -4.076309 | -0.462718 | -3.612190 |
| 110 | 1 | 0 | -5.706029 | 0.045884  | -4.128682 |
| 111 | 6 | 0 | -6.418172 | 1.488782  | -1.947151 |
| 112 | 1 | 0 | -6.883074 | 0.722431  | -1.316839 |
| 113 | 1 | 0 | -7.025786 | 1.625650  | -2.848205 |
| 114 | 1 | 0 | -6.406514 | 2.432685  | -1.392217 |
| 115 | 6 | 0 | -4.317072 | 2.238251  | -3.128097 |
| 116 | 1 | 0 | -3.302927 | 1.964482  | -3.422961 |
| 117 | 1 | 0 | -4.269524 | 3.143734  | -2.517816 |
| 118 | 1 | 0 | -4.906298 | 2.453245  | -4.027519 |

|     |   |   |           |           |           |
|-----|---|---|-----------|-----------|-----------|
| 119 | 6 | 0 | -0.776889 | -2.765214 | -1.217794 |
| 120 | 6 | 0 | -1.373896 | -4.165225 | -0.986155 |
| 121 | 1 | 0 | -0.608005 | -4.714916 | -0.422503 |
| 122 | 6 | 0 | -1.729424 | -5.013336 | -2.238764 |
| 123 | 6 | 0 | -0.401514 | -5.285029 | -2.992430 |
| 124 | 1 | 0 | 0.042808  | -4.344727 | -3.326303 |
| 125 | 1 | 0 | -0.601568 | -5.913879 | -3.866859 |
| 126 | 1 | 0 | 0.312754  | -5.809943 | -2.345861 |
| 127 | 6 | 0 | -2.314173 | -6.361810 | -1.754276 |
| 128 | 1 | 0 | -3.272496 | -6.211132 | -1.247210 |
| 129 | 1 | 0 | -1.625768 | -6.862745 | -1.062393 |
| 130 | 1 | 0 | -2.477260 | -7.016683 | -2.617047 |
| 131 | 6 | 0 | -2.733487 | -4.328634 | -3.194789 |
| 132 | 1 | 0 | -2.332395 | -3.375145 | -3.540258 |
| 133 | 1 | 0 | -3.691081 | -4.143111 | -2.704461 |
| 134 | 1 | 0 | -2.900672 | -4.984413 | -4.057397 |
| 135 | 6 | 0 | 3.701496  | -0.632979 | 3.204749  |
| 136 | 6 | 0 | 3.680165  | -2.018888 | 3.391038  |
| 137 | 6 | 0 | 2.495449  | -2.751674 | 3.246017  |
| 138 | 6 | 0 | 1.333128  | -2.065485 | 2.922090  |
| 139 | 6 | 0 | 1.359985  | -0.665908 | 2.719385  |
| 140 | 6 | 0 | 2.534297  | 0.057228  | 2.856204  |
| 141 | 7 | 0 | 0.024357  | -2.536561 | 2.784998  |
| 142 | 6 | 0 | -0.888814 | -1.517034 | 2.521287  |
| 143 | 6 | 0 | -0.015849 | -0.282309 | 2.380848  |
| 144 | 8 | 0 | -2.111720 | -1.624843 | 2.438037  |
| 145 | 1 | 0 | 4.631386  | -0.087218 | 3.304298  |
| 146 | 1 | 0 | 4.596430  | -2.539371 | 3.639618  |
| 147 | 1 | 0 | 2.484314  | -3.824025 | 3.395860  |
| 148 | 1 | 0 | 2.557964  | 1.124913  | 2.673920  |
| 149 | 1 | 0 | -0.246262 | -3.514832 | 2.692590  |
| 150 | 7 | 0 | -0.502873 | 0.938424  | 2.538148  |
| 151 | 7 | 0 | -0.915449 | 1.999293  | 2.609247  |

-----

**C12:**

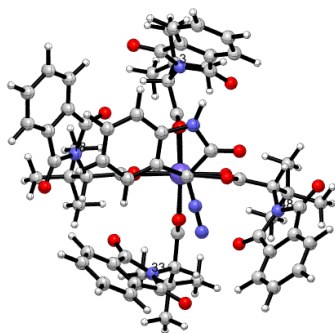

**E= -4334.4397362 a.u. (E<sub>rel</sub>=3.8 kcal/mol)**

| Center<br>Number | Atomic<br>Number | Atomic<br>Type | Coordinates (Angstroms) |           |           |
|------------------|------------------|----------------|-------------------------|-----------|-----------|
|                  |                  |                | X                       | Y         | Z         |
| 1                | 45               | 0              | -0.295355               | -0.285676 | -0.111835 |
| 2                | 45               | 0              | -0.576491               | -0.299843 | -2.517689 |
| 3                | 7                | 0              | 3.438985                | -3.124807 | -0.445060 |
| 4                | 8                | 0              | 1.503081                | -4.460724 | -0.301913 |
| 5                | 8                | 0              | 5.467617                | -2.055124 | 0.056910  |
| 6                | 6                | 0              | 2.554244                | -4.041373 | 0.171995  |
| 7                | 6                | 0              | 3.193482                | -4.370690 | 1.485597  |
| 8                | 6                | 0              | 2.751447                | -5.198674 | 2.504673  |
| 9                | 1                | 0              | 1.812427                | -5.732179 | 2.417494  |
| 10               | 6                | 0              | 3.561314                | -5.308297 | 3.647964  |
| 11               | 1                | 0              | 3.246840                | -5.943729 | 4.467027  |
| 12               | 6                | 0              | 4.770889                | -4.608152 | 3.744297  |
| 13               | 1                | 0              | 5.377458                | -4.714277 | 4.635615  |
| 14               | 6                | 0              | 5.205061                | -3.771354 | 2.702926  |
| 15               | 1                | 0              | 6.138827                | -3.225542 | 2.765111  |
| 16               | 6                | 0              | 4.394583                | -3.665905 | 1.585806  |
| 17               | 6                | 0              | 4.560583                | -2.837199 | 0.351117  |
| 18               | 7                | 0              | 3.179679                | 2.864195  | -0.732667 |
| 19               | 8                | 0              | 3.740459                | 0.725171  | -1.503934 |
| 20               | 8                | 0              | 2.978906                | 4.764932  | 0.633997  |
| 21               | 6                | 0              | 3.955828                | 1.686452  | -0.763186 |
| 22               | 6                | 0              | 5.029493                | 1.896120  | 0.250262  |
| 23               | 6                | 0              | 6.062223                | 1.057748  | 0.631015  |
| 24               | 1                | 0              | 6.143500                | 0.055691  | 0.226110  |
| 25               | 6                | 0              | 6.950951                | 1.540021  | 1.606984  |
| 26               | 1                | 0              | 7.779658                | 0.919105  | 1.926594  |
| 27               | 6                | 0              | 6.782300                | 2.807903  | 2.177884  |
| 28               | 1                | 0              | 7.488831                | 3.156316  | 2.922254  |
| 29               | 6                | 0              | 5.703423                | 3.628376  | 1.807594  |
| 30               | 1                | 0              | 5.550336                | 4.600713  | 2.260269  |

|    |   |   |           |           |           |
|----|---|---|-----------|-----------|-----------|
| 31 | 6 | 0 | 4.840048  | 3.149119  | 0.839824  |
| 32 | 6 | 0 | 3.583955  | 3.746333  | 0.287520  |
| 33 | 7 | 0 | -2.992003 | 3.373062  | 0.164902  |
| 34 | 8 | 0 | -0.926255 | 3.840381  | -0.852838 |
| 35 | 8 | 0 | -4.645732 | 2.999235  | 1.790933  |
| 36 | 6 | 0 | -1.672785 | 3.876044  | 0.127997  |
| 37 | 6 | 0 | -1.403713 | 4.408465  | 1.492497  |
| 38 | 6 | 0 | -0.252462 | 4.985629  | 2.005664  |
| 39 | 1 | 0 | 0.647851  | 5.097767  | 1.408612  |
| 40 | 6 | 0 | -0.282798 | 5.375161  | 3.355942  |
| 41 | 1 | 0 | 0.595428  | 5.830351  | 3.797880  |
| 42 | 6 | 0 | -1.424226 | 5.177045  | 4.142981  |
| 43 | 1 | 0 | -1.414963 | 5.486908  | 5.181168  |
| 44 | 6 | 0 | -2.572775 | 4.568436  | 3.611470  |
| 45 | 1 | 0 | -3.452577 | 4.391106  | 4.217788  |
| 46 | 6 | 0 | -2.537731 | 4.191609  | 2.280883  |
| 47 | 6 | 0 | -3.556283 | 3.467747  | 1.457425  |
| 48 | 7 | 0 | -4.180499 | -2.698605 | 0.235599  |
| 49 | 8 | 0 | -4.408018 | -0.451717 | -0.401865 |
| 50 | 8 | 0 | -4.189478 | -4.694515 | 1.471234  |
| 51 | 6 | 0 | -4.542202 | -1.355257 | 0.429415  |
| 52 | 6 | 0 | -5.109507 | -1.285928 | 1.807282  |
| 53 | 6 | 0 | -5.586485 | -0.194357 | 2.515035  |
| 54 | 1 | 0 | -5.543672 | 0.809913  | 2.108016  |
| 55 | 6 | 0 | -6.070237 | -0.434899 | 3.811805  |
| 56 | 1 | 0 | -6.450671 | 0.392461  | 4.398842  |
| 57 | 6 | 0 | -6.059262 | -1.722105 | 4.362687  |
| 58 | 1 | 0 | -6.439070 | -1.875673 | 5.365874  |
| 59 | 6 | 0 | -5.548833 | -2.812643 | 3.640284  |
| 60 | 1 | 0 | -5.515147 | -3.808898 | 4.063768  |
| 61 | 6 | 0 | -5.078250 | -2.567563 | 2.363444  |
| 62 | 6 | 0 | -4.449596 | -3.498172 | 1.379213  |
| 63 | 8 | 0 | 1.335770  | -1.515754 | -0.353135 |
| 64 | 8 | 0 | 1.095595  | -1.487415 | -2.633159 |
| 65 | 8 | 0 | 0.979095  | 1.311288  | -0.345350 |
| 66 | 8 | 0 | 0.631087  | 1.352023  | -2.613404 |
| 67 | 8 | 0 | -1.838843 | 1.035610  | -0.024495 |
| 68 | 8 | 0 | -2.191273 | 0.969153  | -2.286873 |
| 69 | 8 | 0 | -1.674603 | -1.793621 | -0.031564 |
| 70 | 8 | 0 | -1.853138 | -1.910356 | -2.309974 |
| 71 | 6 | 0 | 1.742576  | -1.776684 | -1.553726 |
| 72 | 6 | 0 | 3.150557  | -2.377315 | -1.677806 |
| 73 | 1 | 0 | 3.814165  | -1.501289 | -1.625658 |
| 74 | 6 | 0 | 3.479468  | -3.144204 | -3.000105 |



|     |   |   |           |           |           |
|-----|---|---|-----------|-----------|-----------|
| 75  | 6 | 0 | 4.838201  | -3.863368 | -2.811701 |
| 76  | 1 | 0 | 5.166680  | -4.268703 | -3.774830 |
| 77  | 1 | 0 | 4.747905  | -4.692236 | -2.102173 |
| 78  | 1 | 0 | 5.599549  | -3.166519 | -2.442419 |
| 79  | 6 | 0 | 2.390933  | -4.173961 | -3.380694 |
| 80  | 1 | 0 | 1.447513  | -3.661297 | -3.581440 |
| 81  | 1 | 0 | 2.225413  | -4.894191 | -2.576177 |
| 82  | 1 | 0 | 2.702849  | -4.711038 | -4.284070 |
| 83  | 6 | 0 | 3.635615  | -2.100228 | -4.135790 |
| 84  | 1 | 0 | 2.699689  | -1.559480 | -4.279385 |
| 85  | 1 | 0 | 3.904316  | -2.613914 | -5.065793 |
| 86  | 1 | 0 | 4.427275  | -1.382138 | -3.890767 |
| 87  | 6 | 0 | 1.148953  | 1.814772  | -1.527407 |
| 88  | 6 | 0 | 1.989922  | 3.097035  | -1.563086 |
| 89  | 1 | 0 | 1.389125  | 3.828349  | -1.011096 |
| 90  | 6 | 0 | 2.305172  | 3.709445  | -2.962912 |
| 91  | 6 | 0 | 3.013254  | 2.718695  | -3.914513 |
| 92  | 1 | 0 | 3.967685  | 2.381402  | -3.500931 |
| 93  | 1 | 0 | 3.207777  | 3.220518  | -4.869802 |
| 94  | 1 | 0 | 2.379941  | 1.848195  | -4.088696 |
| 95  | 6 | 0 | 3.214059  | 4.945573  | -2.746126 |
| 96  | 1 | 0 | 4.207277  | 4.641592  | -2.398742 |
| 97  | 1 | 0 | 2.780377  | 5.629428  | -2.007583 |
| 98  | 1 | 0 | 3.331164  | 5.478319  | -3.696093 |
| 99  | 6 | 0 | 0.970552  | 4.185341  | -3.591494 |
| 100 | 1 | 0 | 0.449963  | 4.875025  | -2.918588 |
| 101 | 1 | 0 | 0.318331  | 3.332494  | -3.782041 |
| 102 | 1 | 0 | 1.180279  | 4.699605  | -4.536125 |
| 103 | 6 | 0 | -2.446951 | 1.412742  | -1.110253 |
| 104 | 6 | 0 | -3.547249 | 2.451125  | -0.847806 |
| 105 | 1 | 0 | -4.319826 | 1.887231  | -0.312273 |
| 106 | 6 | 0 | -4.218953 | 3.128110  | -2.072260 |
| 107 | 6 | 0 | -4.996949 | 2.033778  | -2.848477 |
| 108 | 1 | 0 | -5.709152 | 1.523822  | -2.189540 |
| 109 | 1 | 0 | -4.305757 | 1.292764  | -3.253036 |
| 110 | 1 | 0 | -5.549426 | 2.498705  | -3.672614 |
| 111 | 6 | 0 | -5.230473 | 4.170456  | -1.535039 |
| 112 | 1 | 0 | -5.910266 | 3.714123  | -0.805782 |
| 113 | 1 | 0 | -5.820330 | 4.567001  | -2.368425 |
| 114 | 1 | 0 | -4.710033 | 5.003399  | -1.051358 |
| 115 | 6 | 0 | -3.211221 | 3.821451  | -3.015993 |
| 116 | 1 | 0 | -2.494494 | 3.094448  | -3.402279 |
| 117 | 1 | 0 | -2.659336 | 4.610245  | -2.499279 |
| 118 | 1 | 0 | -3.757624 | 4.266291  | -3.855941 |

|     |   |   |           |           |           |
|-----|---|---|-----------|-----------|-----------|
| 119 | 6 | 0 | -2.225903 | -2.230822 | -1.117982 |
| 120 | 6 | 0 | -3.388816 | -3.217495 | -0.894085 |
| 121 | 1 | 0 | -2.942975 | -4.139199 | -0.493999 |
| 122 | 6 | 0 | -4.226335 | -3.617563 | -2.146859 |
| 123 | 6 | 0 | -3.316542 | -4.461114 | -3.076121 |
| 124 | 1 | 0 | -2.460699 | -3.869863 | -3.406720 |
| 125 | 1 | 0 | -3.890232 | -4.780385 | -3.953378 |
| 126 | 1 | 0 | -2.957514 | -5.357373 | -2.554897 |
| 127 | 6 | 0 | -5.401994 | -4.505481 | -1.666992 |
| 128 | 1 | 0 | -6.133578 | -3.908855 | -1.112317 |
| 129 | 1 | 0 | -5.046950 | -5.311550 | -1.015335 |
| 130 | 1 | 0 | -5.902298 | -4.942793 | -2.537819 |
| 131 | 6 | 0 | -4.787925 | -2.402065 | -2.919704 |
| 132 | 1 | 0 | -3.972931 | -1.786893 | -3.303261 |
| 133 | 1 | 0 | -5.416932 | -1.781019 | -2.277425 |
| 134 | 1 | 0 | -5.391808 | -2.764235 | -3.760096 |
| 135 | 6 | 0 | 2.611934  | 2.045005  | 3.131674  |
| 136 | 6 | 0 | 3.589379  | 1.070267  | 3.355489  |
| 137 | 6 | 0 | 3.293565  | -0.293865 | 3.240685  |
| 138 | 6 | 0 | 1.996275  | -0.658897 | 2.906945  |
| 139 | 6 | 0 | 1.013147  | 0.328031  | 2.669242  |
| 140 | 6 | 0 | 1.309011  | 1.678057  | 2.774530  |
| 141 | 7 | 0 | 1.420344  | -1.926483 | 2.793202  |
| 142 | 6 | 0 | 0.049203  | -1.886157 | 2.523497  |
| 143 | 6 | 0 | -0.219130 | -0.399623 | 2.331192  |
| 144 | 8 | 0 | -0.721956 | -2.840747 | 2.494169  |
| 145 | 1 | 0 | 2.865603  | 3.094968  | 3.206020  |
| 146 | 1 | 0 | 4.598905  | 1.373311  | 3.602252  |
| 147 | 1 | 0 | 4.052449  | -1.045509 | 3.417037  |
| 148 | 1 | 0 | 0.559246  | 2.431080  | 2.567519  |
| 149 | 1 | 0 | 1.920750  | -2.806149 | 2.849270  |
| 150 | 7 | 0 | -1.429962 | 0.097733  | 2.555481  |
| 151 | 7 | 0 | -2.470638 | 0.545471  | 2.668062  |

---
